# Supplementary material for: Inhibiting Histone and DNA Methylation Improves Cancer Vaccination in an Experimental Model of Melanoma
Source: PubMed Central journal article supplement (PMC9134079; doi:10.3389/fimmu.2022.799636), 2022-05-12
Supplement: DataSheet_2.pdf [file DataSheet_2.pdf]

## SUPPLEMENTARY TABLES

**Table S1:** RNA sequencing of CM-272-treated MO4 cells *in vitro* - normalized gene expression counts and log<sub>2</sub>-fold changes (**page 1-58**); **Table S2:** RNA sequencing of CM-272-treated MO4 cells *in vitro* - significantly changed gene sets (**page 59-68**); **Table S3:** Multiplex gene expression analysis on *ex vivo* tumor tissue - significantly changed gene sets (**page 69**); **Table S4:** Report on statistical significance pertaining to Figure 5C (**page 70**).

**Table S1 – RNA sequencing of CM-272-treated MO4 cells *in vitro* - normalized gene expression counts and log<sub>2</sub>-fold changes. <sup>1</sup>**

| Gene symbol | Log <sub>2</sub> -fold change <sup>2</sup> | q-value   | p-value   |
|-------------|--------------------------------------------|-----------|-----------|
| Ccnb1-ps    | -4,1347375                                 | 0,0000000 | 0,0000000 |
| Ska1        | -4,0254682                                 | 0,0000000 | 0,0000000 |
| H2ac12      | -3,9147032                                 | 0,0000000 | 0,0000000 |
| Gm12856     | -3,7981566                                 | 0,0000000 | 0,0000000 |
| Pimreg      | -3,6647352                                 | 0,0000000 | 0,0000000 |
| Depdc1a     | -3,6566913                                 | 0,0000000 | 0,0000000 |
| Ccna2       | -3,6081603                                 | 0,0000000 | 0,0000000 |
| Cenpf       | -3,5921527                                 | 0,0000000 | 0,0000000 |
| Hmmr        | -3,540225                                  | 0,0000000 | 0,0000000 |
| Cenpe       | -3,5394196                                 | 0,0000000 | 0,0000000 |
| Plk1        | -3,499661                                  | 0,0000000 | 0,0000000 |
| Ccnb1       | -3,4988183                                 | 0,0000000 | 0,0000000 |
| Cdkn3       | -3,4883359                                 | 0,0000000 | 0,0000000 |
| Mki67       | -3,4763774                                 | 0,0000000 | 0,0000000 |
| Spag5       | -3,4486162                                 | 0,0000000 | 0,0000000 |
| Pif1        | -3,4407567                                 | 0,0000000 | 0,0000000 |
| Aurkb       | -3,4194024                                 | 0,0000000 | 0,0000000 |
| Nek2        | -3,4183896                                 | 0,0000000 | 0,0000000 |
| Ccnb2       | -3,4131431                                 | 0,0000000 | 0,0000000 |
| Cdk1        | -3,3936285                                 | 0,0000000 | 0,0000000 |
| Troap       | -3,3870243                                 | 0,0000000 | 0,0000000 |
| H2bu1-ps    | -3,3667004                                 | 0,0000000 | 0,0000000 |
| H3c8        | -3,3658868                                 | 0,0000000 | 0,0000000 |
| Kif20a      | -3,3619289                                 | 0,0000000 | 0,0000000 |
| Aspm        | -3,3548509                                 | 0,0000000 | 0,0000000 |
| H2ac4       | -3,3493837                                 | 0,0000000 | 0,0000000 |
| Bub1        | -3,3368604                                 | 0,0000000 | 0,0000000 |
| Ube2c       | -3,3337322                                 | 0,0000000 | 0,0000000 |
| Sapcd2      | -3,3300053                                 | 0,0000000 | 0,0000000 |
| Pbk         | -3,3245753                                 | 0,0000000 | 0,0000000 |
| Nuf2        | -3,3144117                                 | 0,0000000 | 0,0000000 |
| Cdc25c      | -3,3112061                                 | 0,0000000 | 0,0000000 |

|                 |            |           |           |
|-----------------|------------|-----------|-----------|
| <b>Ttk</b>      | -3,3070152 | 0,0000000 | 0,0000000 |
| <b>Cit</b>      | -3,3021253 | 0,0000000 | 0,0000000 |
| <b>Tacc3</b>    | -3,2907224 | 0,0000000 | 0,0000000 |
| <b>Kn11</b>     | -3,2833459 | 0,0000000 | 0,0000000 |
| <b>Cenpa</b>    | -3,2776714 | 0,0000000 | 0,0000000 |
| <b>Kif11</b>    | -3,2767817 | 0,0000000 | 0,0000000 |
| <b>Ckap2l</b>   | -3,2726165 | 0,0000000 | 0,0000000 |
| <b>Birc5</b>    | -3,2711752 | 0,0000000 | 0,0000000 |
| <b>Kif2c</b>    | -3,2577494 | 0,0000000 | 0,0000000 |
| <b>H3c3</b>     | -3,254268  | 0,0000000 | 0,0000000 |
| <b>Prr11</b>    | -3,2269347 | 0,0000000 | 0,0000000 |
| <b>Kif14</b>    | -3,2218341 | 0,0000000 | 0,0000000 |
| <b>Dlgap5</b>   | -3,2168215 | 0,0000000 | 0,0000000 |
| <b>Kif15</b>    | -3,2127121 | 0,0000000 | 0,0000000 |
| <b>H2bc11</b>   | -3,1915446 | 0,0000000 | 0,0000000 |
| <b>Cep55</b>    | -3,1864117 | 0,0000000 | 0,0000000 |
| <b>Sgo1</b>     | -3,1823859 | 0,0000000 | 0,0000000 |
| <b>Racgap1</b>  | -3,1661056 | 0,0000000 | 0,0000000 |
| <b>Cdca3</b>    | -3,1598981 | 0,0000000 | 0,0000000 |
| <b>Ndc80</b>    | -3,1504508 | 0,0000000 | 0,0000000 |
| <b>H2bc12</b>   | -3,1458645 | 0,0000000 | 0,0000000 |
| <b>Iqgap3</b>   | -3,1257731 | 0,0000000 | 0,0000000 |
| <b>Knstrn</b>   | -3,1233334 | 0,0000000 | 0,0000000 |
| <b>E2f8</b>     | -3,1160295 | 0,0000000 | 0,0000000 |
| <b>Tpx2</b>     | -3,0982327 | 0,0000000 | 0,0000000 |
| <b>Cdca8</b>    | -3,0946976 | 0,0000000 | 0,0000000 |
| <b>Shcbp1</b>   | -3,0779693 | 0,0000000 | 0,0000000 |
| <b>Cip2a</b>    | -3,0700741 | 0,0000000 | 0,0000000 |
| <b>Spc24</b>    | -3,0692056 | 0,0000000 | 0,0000000 |
| <b>Clspn</b>    | -3,0681375 | 0,0000000 | 0,0000000 |
| <b>Top2a</b>    | -3,0672933 | 0,0000000 | 0,0000000 |
| <b>Mybl2</b>    | -3,0387531 | 0,0000000 | 0,0000000 |
| <b>Phf19</b>    | -3,0371398 | 0,0000000 | 0,0000000 |
| <b>Espl1</b>    | -3,0347456 | 0,0000000 | 0,0000000 |
| <b>Hmgb2</b>    | -3,0207861 | 0,0000000 | 0,0000000 |
| <b>Cdca2</b>    | -3,0167948 | 0,0000000 | 0,0000000 |
| <b>Kif4</b>     | -3,0149558 | 0,0000000 | 0,0000000 |
| <b>Arhgef39</b> | -3,0135798 | 0,0000000 | 0,0000000 |
| <b>Kif18b</b>   | -2,9927619 | 0,0000000 | 0,0000000 |
| <b>Gm13237</b>  | -2,9833873 | 0,0000000 | 0,0000000 |
| <b>Bub1b</b>    | -2,982978  | 0,0000000 | 0,0000000 |
| <b>Kif23</b>    | -2,9739727 | 0,0000000 | 0,0000000 |

|                 |            |           |           |
|-----------------|------------|-----------|-----------|
| <b>Neil3</b>    | -2,9665909 | 0,0000000 | 0,0000000 |
| <b>H2ac8</b>    | -2,9551475 | 0,0000000 | 0,0000000 |
| <b>Cdca5</b>    | -2,9471841 | 0,0000000 | 0,0000000 |
| <b>H2ac10</b>   | -2,9435189 | 0,0000000 | 0,0000000 |
| <b>Arhgap19</b> | -2,9418074 | 0,0000000 | 0,0000000 |
| <b>Kif20b</b>   | -2,9403812 | 0,0000000 | 0,0000000 |
| <b>Sgo2a</b>    | -2,9359783 | 0,0000000 | 0,0000000 |
| <b>H2bc3</b>    | -2,9356635 | 0,0000000 | 0,0000000 |
| <b>Gmn</b>      | -2,9306823 | 0,0000000 | 0,0000000 |
| <b>Polq</b>     | -2,9302649 | 0,0000000 | 0,0000000 |
| <b>Melk</b>     | -2,9160451 | 0,0000000 | 0,0000000 |
| <b>Chaf1b</b>   | -2,9131269 | 0,0000000 | 0,0000000 |
| <b>Cdc20</b>    | -2,9104946 | 0,0000000 | 0,0000000 |
| <b>Dna2</b>     | -2,9067503 | 0,0000000 | 0,0000000 |
| <b>H3c1</b>     | -2,9036269 | 0,0000000 | 0,0000000 |
| <b>Kif22</b>    | -2,8979858 | 0,0000000 | 0,0000000 |
| <b>Fbxo5</b>    | -2,8979286 | 0,0000000 | 0,0000000 |
| <b>Ncapd2</b>   | -2,8955089 | 0,0000000 | 0,0000000 |
| <b>Mcm5</b>     | -2,8934462 | 0,0000000 | 0,0000000 |
| <b>Aurka</b>    | -2,8899949 | 0,0000000 | 0,0000000 |
| <b>Mns1</b>     | -2,8767008 | 0,0000000 | 0,0000000 |
| <b>Hrob</b>     | -2,8636668 | 0,0000000 | 0,0000000 |
| <b>Uhrf1</b>    | -2,862257  | 0,0000000 | 0,0000000 |
| <b>Ncapg</b>    | -2,8537155 | 0,0000000 | 0,0000000 |
| <b>H2ax</b>     | -2,8493259 | 0,0000000 | 0,0000000 |
| <b>Cenpi</b>    | -2,8439729 | 0,0000000 | 0,0000000 |
| <b>Tk1</b>      | -2,8423123 | 0,0000000 | 0,0000000 |
| <b>Prcl</b>     | -2,8381259 | 0,0000000 | 0,0000000 |
| <b>Parpbp</b>   | -2,8353337 | 0,0000000 | 0,0000000 |
| <b>H4f16</b>    | -2,8326882 | 0,0000000 | 0,0000000 |
| <b>Nup210</b>   | -2,8228022 | 0,0000000 | 0,0000000 |
| <b>H2ac11</b>   | -2,8145992 | 0,0000000 | 0,0000000 |
| <b>Ticrr</b>    | -2,8018397 | 0,0000000 | 0,0000000 |
| <b>Gm15428</b>  | -2,7952902 | 0,0000000 | 0,0000000 |
| <b>Ccnf</b>     | -2,7890627 | 0,0000000 | 0,0000000 |
| <b>Gm6091</b>   | -2,7858897 | 0,0000000 | 0,0000000 |
| <b>Kntc1</b>    | -2,7825599 | 0,0000000 | 0,0000000 |
| <b>Gm5853</b>   | -2,775122  | 0,0000000 | 0,0000000 |
| <b>Gm5648</b>   | -2,7714933 | 0,0000000 | 0,0000000 |
| <b>Ercc6l</b>   | -2,7678747 | 0,0000000 | 0,0000000 |
| <b>Pclaf</b>    | -2,7641846 | 0,0000000 | 0,0000000 |
| <b>Mtfr2</b>    | -2,7429425 | 0,0000000 | 0,0000000 |

|                 |            |           |           |
|-----------------|------------|-----------|-----------|
| <b>Lig1</b>     | -2,7212199 | 0,0000000 | 0,0000000 |
| <b>H2bc6</b>    | -2,7197708 | 0,0000000 | 0,0000000 |
| <b>Nsl1</b>     | -2,7190627 | 0,0000000 | 0,0000000 |
| <b>Gm13160</b>  | -2,7169813 | 0,0000001 | 0,0000001 |
| <b>Incenp</b>   | -2,7152748 | 0,0000000 | 0,0000000 |
| <b>Atad2</b>    | -2,7029774 | 0,0000000 | 0,0000000 |
| <b>Mis18bp1</b> | -2,6921126 | 0,0000000 | 0,0000000 |
| <b>Dscc1</b>    | -2,6868389 | 0,0000000 | 0,0000000 |
| <b>H4c14</b>    | -2,6784439 | 0,0000000 | 0,0000000 |
| <b>Rmi2</b>     | -2,6567392 | 0,0000000 | 0,0000000 |
| <b>Ect2</b>     | -2,6506809 | 0,0000000 | 0,0000000 |
| <b>H4c6</b>     | -2,6493017 | 0,0000000 | 0,0000000 |
| <b>Mcm10</b>    | -2,6420664 | 0,0000000 | 0,0000000 |
| <b>Mxd3</b>     | -2,6408284 | 0,0000000 | 0,0000000 |
| <b>H3c7</b>     | -2,6407454 | 0,0000000 | 0,0000000 |
| <b>Kif18a</b>   | -2,6385523 | 0,0000000 | 0,0000000 |
| <b>Aunip</b>    | -2,6368671 | 0,0000000 | 0,0000000 |
| <b>H2bc8</b>    | -2,6234364 | 0,0000000 | 0,0000000 |
| <b>Fanci</b>    | -2,6212722 | 0,0000000 | 0,0000000 |
| <b>Fanced2</b>  | -2,6196934 | 0,0000000 | 0,0000000 |
| <b>Mcm2</b>     | -2,6129593 | 0,0000000 | 0,0000000 |
| <b>Ncapg2</b>   | -2,6069562 | 0,0000000 | 0,0000000 |
| <b>Mcm3</b>     | -2,6038143 | 0,0000000 | 0,0000000 |
| <b>Gen1</b>     | -2,599698  | 0,0000000 | 0,0000000 |
| <b>E2f2</b>     | -2,5959678 | 0,0000000 | 0,0000000 |
| <b>Exo1</b>     | -2,5510484 | 0,0000000 | 0,0000000 |
| <b>Bard1</b>    | -2,5468316 | 0,0000000 | 0,0000000 |
| <b>Rad51ap1</b> | -2,5468007 | 0,0000000 | 0,0000000 |
| <b>H1f3</b>     | -2,5407484 | 0,0000000 | 0,0000000 |
| <b>H4c1</b>     | -2,5403381 | 0,0000000 | 0,0000000 |
| <b>Traip</b>    | -2,5235152 | 0,0000000 | 0,0000000 |
| <b>Cdc6</b>     | -2,4924737 | 0,0000000 | 0,0000000 |
| <b>H3c6</b>     | -2,4915301 | 0,0000000 | 0,0000000 |
| <b>Mad2l1</b>   | -2,4893762 | 0,0000000 | 0,0000000 |
| <b>Cdc45</b>    | -2,4862271 | 0,0000000 | 0,0000000 |
| <b>Gins1</b>    | -2,4764353 | 0,0000000 | 0,0000000 |
| <b>N4bp3</b>    | -2,4695288 | 0,0000000 | 0,0000000 |
| <b>H2bc4</b>    | -2,4633956 | 0,0000000 | 0,0000000 |
| <b>Ccdc34</b>   | -2,4619313 | 0,0000000 | 0,0000000 |
| <b>Wdr62</b>    | -2,4443986 | 0,0000000 | 0,0000000 |
| <b>Pmf1</b>     | -2,4339944 | 0,0000000 | 0,0000000 |
| <b>Cdc25b</b>   | -2,4276333 | 0,0000000 | 0,0000000 |

|                  |            |           |            |
|------------------|------------|-----------|------------|
| <b>Pold1</b>     | -2,4176296 | 0,0000000 | 0,0000000  |
| <b>Cdt1</b>      | -2,4171866 | 0,0000000 | 0,0000000  |
| <b>Depdc1b</b>   | -2,4153508 | 0,0000003 | 0,0000004  |
| <b>Rrm2</b>      | -2,4150193 | 0,0000000 | 0,0000000  |
| <b>Rad51</b>     | -2,4085386 | 0,0000000 | 0,0000000  |
| <b>Eme1</b>      | -2,406928  | 0,0000000 | 0,0000000  |
| <b>Esco2</b>     | -2,4043727 | 0,0000000 | 0,0000000  |
| <b>Gjb2</b>      | -2,4042934 | 0,0000000 | 0,0000000  |
| <b>Lmnb1</b>     | -2,3996858 | 0,0000000 | 0,0000000  |
| <b>H4c2</b>      | -2,3988428 | 0,0000000 | 0,0000000  |
| <b>Pkmyt1</b>    | -2,3984809 | 0,0000000 | 0,0000000  |
| <b>Foxm1</b>     | -2,3867811 | 0,0000000 | 0,0000000  |
| <b>Trip13</b>    | -2,3865299 | 0,0000000 | 0,0000000  |
| <b>Cenpu</b>     | -2,3849786 | 0,0000000 | 0,0000000  |
| <b>Nusap1</b>    | -2,3830458 | 0,0000000 | 0,0000000  |
| <b>Cntfr</b>     | -2,3751741 | 0,0000000 | 0,0000000  |
| <b>Rbl1</b>      | -2,3745396 | 0,0000000 | 0,0000000  |
| <b>Cenpw</b>     | -2,3696453 | 0,0000000 | 0,0000000  |
| <b>Plk4</b>      | -2,3612534 | 0,0000000 | 0,0000000  |
| <b>Chek1</b>     | -2,3583141 | 0,0000000 | 0,0000000  |
| <b>Chaf1a</b>    | -2,3570417 | 0,0000000 | 0,0000000  |
| <b>Fanca</b>     | -2,355321  | 0,0000000 | 0,0000000  |
| <b>Prim1</b>     | -2,3526523 | 0,0000000 | 0,0000000  |
| <b>Cenph</b>     | -2,3526083 | 0,0000000 | 0,0000000  |
| <b>Aire</b>      | -2,3467895 | 0,0000225 | 0,00000424 |
| <b>H4c8</b>      | -2,3399366 | 0,0000000 | 0,0000000  |
| <b>H1f6</b>      | -2,3288339 | 0,0000000 | 0,0000000  |
| <b>Ankle1</b>    | -2,3265039 | 0,0000000 | 0,0000000  |
| <b>H1f4</b>      | -2,3222333 | 0,0000000 | 0,0000000  |
| <b>Arhgap11a</b> | -2,3075014 | 0,0000000 | 0,0000000  |
| <b>Gpsm2</b>     | -2,3058961 | 0,0000000 | 0,0000000  |
| <b>Ung</b>       | -2,292136  | 0,0000000 | 0,0000000  |
| <b>Pole</b>      | -2,2862413 | 0,0000000 | 0,0000000  |
| <b>Gm12387</b>   | -2,2703188 | 0,0001610 | 0,00003492 |
| <b>H2ac6</b>     | -2,2679386 | 0,0000000 | 0,0000000  |
| <b>Mcm7</b>      | -2,2568544 | 0,0000000 | 0,0000000  |
| <b>Mlf1</b>      | -2,2476333 | 0,0000000 | 0,0000000  |
| <b>Cenpm</b>     | -2,2468687 | 0,0000000 | 0,0000000  |
| <b>Fndc3c1</b>   | -2,2465597 | 0,0000000 | 0,0000000  |
| <b>H2ac20</b>    | -2,2434024 | 0,0000000 | 0,0000000  |
| <b>Wdhd1</b>     | -2,2353798 | 0,0000000 | 0,0000000  |
| <b>Dbf4</b>      | -2,2308662 | 0,0000000 | 0,0000000  |

|                      |            |           |            |
|----------------------|------------|-----------|------------|
| <b>Cenps</b>         | -2,2131403 | 0,0000000 | 0,0000000  |
| <b>Tyms</b>          | -2,207161  | 0,0000000 | 0,0000000  |
| <b>Hmx2</b>          | -2,192737  | 0,0000000 | 0,0000000  |
| <b>Mastl</b>         | -2,1882585 | 0,0000000 | 0,0000000  |
| <b>Cdc25a</b>        | -2,1858425 | 0,0000000 | 0,0000000  |
| <b>Impa2</b>         | -2,1824926 | 0,0000000 | 0,0000000  |
| <b>Cenpq</b>         | -2,1798743 | 0,0000000 | 0,0000000  |
| <b>Ska3</b>          | -2,1780578 | 0,0000000 | 0,0000000  |
| <b>Atad5</b>         | -2,1729647 | 0,0000000 | 0,0000000  |
| <b>Lmo1</b>          | -2,1706644 | 0,0000000 | 0,0000000  |
| <b>2700099C18Rik</b> | -2,1695322 | 0,0000000 | 0,0000000  |
| <b>Chtf18</b>        | -2,1672737 | 0,0000000 | 0,0000000  |
| <b>Hmgb1-ps3</b>     | -2,1623297 | 0,0000149 | 0,00000273 |
| <b>H4c3</b>          | -2,1619331 | 0,0000000 | 0,0000000  |
| <b>Iqgap2</b>        | -2,1586557 | 0,0000000 | 0,0000000  |
| <b>Mcm4</b>          | -2,1574914 | 0,0000000 | 0,0000000  |
| <b>Vash1</b>         | -2,1479079 | 0,0000000 | 0,0000000  |
| <b>Efcab11</b>       | -2,1427908 | 0,0000000 | 0,0000000  |
| <b>H4c4</b>          | -2,1388975 | 0,0000000 | 0,0000000  |
| <b>Enpp2</b>         | -2,1350249 | 0,0000000 | 0,0000000  |
| <b>Smc2</b>          | -2,1288572 | 0,0000000 | 0,0000000  |
| <b>Cep152</b>        | -2,1266937 | 0,0000000 | 0,0000000  |
| <b>2810429I04Rik</b> | -2,125589  | 0,0000000 | 0,0000000  |
| <b>Cep89</b>         | -2,1228246 | 0,0000000 | 0,0000000  |
| <b>Gm44521</b>       | -2,1222818 | 0,0002261 | 0,00005034 |
| <b>Lrr1</b>          | -2,1194085 | 0,0000000 | 0,0000000  |
| <b>Rrm1</b>          | -2,1115537 | 0,0000000 | 0,0000000  |
| <b>Cdk2</b>          | -2,1114148 | 0,0000000 | 0,0000000  |
| <b>Ccne2</b>         | -2,1062309 | 0,0000000 | 0,0000000  |
| <b>Ccsap</b>         | -2,0969306 | 0,0000000 | 0,0000000  |
| <b>Ccdc85c</b>       | -2,0768439 | 0,0000000 | 0,0000000  |
| <b>Stil</b>          | -2,0721507 | 0,0000000 | 0,0000000  |
| <b>Mgam2-ps</b>      | -2,0702346 | 0,0000001 | 0,00000001 |
| <b>Timeless</b>      | -2,0641858 | 0,0000000 | 0,0000000  |
| <b>Dut</b>           | -2,05539   | 0,0000000 | 0,0000000  |
| <b>E2f7</b>          | -2,053647  | 0,0000000 | 0,0000000  |
| <b>Gm20667</b>       | -2,0512635 | 0,0000002 | 0,00000002 |
| <b>Orc1</b>          | -2,047915  | 0,0000000 | 0,0000000  |
| <b>Arhgap33</b>      | -2,0453785 | 0,0005470 | 0,00013191 |
| <b>Asf1b</b>         | -2,0428776 | 0,0000000 | 0,0000000  |
| <b>Rad54l</b>        | -2,0425766 | 0,0000000 | 0,0000000  |
| <b>Spdl1</b>         | -2,0403423 | 0,0000000 | 0,0000000  |

|                      |            |           |            |
|----------------------|------------|-----------|------------|
| <b>4930558J18Rik</b> | -2,0384679 | 0,0000061 | 0,00000107 |
| <b>Ube2t</b>         | -2,0229467 | 0,0000000 | 0,00000000 |
| <b>E2f1</b>          | -2,0226574 | 0,0000000 | 0,00000000 |
| <b>Dtl</b>           | -2,0207382 | 0,0000000 | 0,00000000 |
| <b>Kifc1</b>         | -2,0196331 | 0,0000000 | 0,00000000 |
| <b>Spc25</b>         | -2,0165306 | 0,0000000 | 0,00000000 |
| <b>Mcm6</b>          | -2,0165224 | 0,0000000 | 0,00000000 |
| <b>Pitpnm3</b>       | -2,0129947 | 0,0003126 | 0,00007185 |
| <b>Recql4</b>        | -2,0127097 | 0,0000000 | 0,00000000 |
| <b>Smtnl2</b>        | -2,0123602 | 0,0000000 | 0,00000000 |
| <b>Aqp1</b>          | -2,0115104 | 0,0000001 | 0,00000002 |
| <b>Gm15452</b>       | -2,0111721 | 0,0000000 | 0,00000000 |
| <b>Lpar5</b>         | -2,0084814 | 0,0000000 | 0,00000000 |
| <b>Shmt1</b>         | -2,0078264 | 0,0000000 | 0,00000000 |
| <b>Dnmt1</b>         | -1,9916607 | 0,0000000 | 0,00000000 |
| <b>Xkr5</b>          | -1,9782918 | 0,0000000 | 0,00000000 |
| <b>Nckap5l</b>       | -1,9743013 | 0,0000000 | 0,00000000 |
| <b>Ccne1</b>         | -1,9733045 | 0,0000000 | 0,00000000 |
| <b>Batf3</b>         | -1,9722207 | 0,0000000 | 0,00000000 |
| <b>Gm10282</b>       | -1,9720448 | 0,0000000 | 0,00000000 |
| <b>Haspin</b>        | -1,9627518 | 0,0000000 | 0,00000000 |
| <b>Megf6</b>         | -1,9592576 | 0,0000000 | 0,00000000 |
| <b>Ddx11</b>         | -1,957994  | 0,0000000 | 0,00000000 |
| <b>Mpp6</b>          | -1,9560401 | 0,0000000 | 0,00000000 |
| <b>Pla2g4c</b>       | -1,9492965 | 0,0007419 | 0,00018376 |
| <b>Gm12261</b>       | -1,9445674 | 0,0000000 | 0,00000000 |
| <b>Sgcg</b>          | -1,9440108 | 0,0000000 | 0,00000000 |
| <b>Rpa2</b>          | -1,9412146 | 0,0000000 | 0,00000000 |
| <b>Rragd</b>         | -1,9312524 | 0,0000000 | 0,00000000 |
| <b>Ncaph</b>         | -1,9283816 | 0,0000000 | 0,00000000 |
| <b>Nasp</b>          | -1,9280666 | 0,0000000 | 0,00000000 |
| <b>Lrfr1</b>         | -1,9237936 | 0,0000000 | 0,00000000 |
| <b>Smc4</b>          | -1,9230941 | 0,0000000 | 0,00000000 |
| <b>Diaph3</b>        | -1,9201467 | 0,0000000 | 0,00000000 |
| <b>Hmgn2</b>         | -1,9186663 | 0,0000000 | 0,00000000 |
| <b>Cep128</b>        | -1,9124486 | 0,0000000 | 0,00000000 |
| <b>Zwilch</b>        | -1,9100512 | 0,0000000 | 0,00000000 |
| <b>Pole2</b>         | -1,9085832 | 0,0000000 | 0,00000000 |
| <b>H3c2</b>          | -1,9052792 | 0,0000000 | 0,00000000 |
| <b>Neurl1b</b>       | -1,901566  | 0,0000227 | 0,00000429 |
| <b>Cenpk</b>         | -1,9005434 | 0,0000000 | 0,00000000 |
| <b>Brip1</b>         | -1,8992739 | 0,0000000 | 0,00000000 |

|                      |            |           |            |
|----------------------|------------|-----------|------------|
| <b>2010110K18Rik</b> | -1,8961877 | 0,0012089 | 0,00031104 |
| <b>Rad54b</b>        | -1,8850622 | 0,0000000 | 0,00000000 |
| <b>Gins2</b>         | -1,8812065 | 0,0000000 | 0,00000000 |
| <b>Wdr76</b>         | -1,8758767 | 0,0000000 | 0,00000000 |
| <b>Cenpn</b>         | -1,8679685 | 0,0000000 | 0,00000000 |
| <b>Gm3756</b>        | -1,8646015 | 0,0000000 | 0,00000000 |
| <b>Gm15387</b>       | -1,8614012 | 0,0000003 | 0,00000004 |
| <b>Figl1</b>         | -1,8612409 | 0,0000000 | 0,00000000 |
| <b>Ctdspl</b>        | -1,8569196 | 0,0000000 | 0,00000000 |
| <b>Bora</b>          | -1,8561479 | 0,0000000 | 0,00000000 |
| <b>Cks2</b>          | -1,8530874 | 0,0000000 | 0,00000000 |
| <b>Hlf</b>           | -1,8511282 | 0,0000000 | 0,00000000 |
| <b>Fam83d</b>        | -1,8509055 | 0,0000024 | 0,00000040 |
| <b>Glt1d1</b>        | -1,8479909 | 0,0000000 | 0,00000000 |
| <b>Rapsn</b>         | -1,8432006 | 0,0000000 | 0,00000000 |
| <b>Pola2</b>         | -1,8391981 | 0,0000000 | 0,00000000 |
| <b>Gm6750</b>        | -1,8370299 | 0,0002925 | 0,00006679 |
| <b>Mis18a</b>        | -1,8357435 | 0,0000000 | 0,00000000 |
| <b>Rfc5</b>          | -1,8330447 | 0,0000000 | 0,00000000 |
| <b>Fam110a</b>       | -1,8327323 | 0,0000000 | 0,00000000 |
| <b>Poc1a</b>         | -1,8317179 | 0,0000000 | 0,00000000 |
| <b>Gm37599</b>       | -1,8270008 | 0,0000409 | 0,00000805 |
| <b>Gm9430</b>        | -1,8103811 | 0,0003453 | 0,00007990 |
| <b>Arhgap32</b>      | -1,8078322 | 0,0000000 | 0,00000000 |
| <b>Hpse</b>          | -1,8036443 | 0,0000000 | 0,00000000 |
| <b>Dmxl2</b>         | -1,7955166 | 0,0000000 | 0,00000000 |
| <b>Blm</b>           | -1,7946543 | 0,0000000 | 0,00000000 |
| <b>Vrk2</b>          | -1,7904219 | 0,0000000 | 0,00000000 |
| <b>Myo7a</b>         | -1,784834  | 0,0000000 | 0,00000000 |
| <b>Tcf19</b>         | -1,7821047 | 0,0000000 | 0,00000000 |
| <b>Map2k6</b>        | -1,775362  | 0,0000000 | 0,00000000 |
| <b>Tyro3</b>         | -1,7752341 | 0,0000000 | 0,00000000 |
| <b>Prickle1</b>      | -1,774294  | 0,0000000 | 0,00000000 |
| <b>2010008C14Rik</b> | -1,7727535 | 0,0000000 | 0,00000000 |
| <b>Nmral1</b>        | -1,7724385 | 0,0000000 | 0,00000000 |
| <b>Klhl23</b>        | -1,7692622 | 0,0000000 | 0,00000000 |
| <b>Pmel</b>          | -1,7659252 | 0,0000000 | 0,00000000 |
| <b>Rapgef3os2</b>    | -1,76436   | 0,0000006 | 0,00000009 |
| <b>Dnmt3b</b>        | -1,7641819 | 0,0000000 | 0,00000000 |
| <b>Lockd</b>         | -1,7572736 | 0,0000000 | 0,00000000 |
| <b>Ptprs</b>         | -1,7546021 | 0,0000000 | 0,00000000 |
| <b>Hmgn2-ps1</b>     | -1,7545762 | 0,0000437 | 0,00000865 |



|                 |            |           |            |
|-----------------|------------|-----------|------------|
| <b>Fancb</b>    | -1,7535402 | 0,0000000 | 0,0000000  |
| <b>Bace2</b>    | -1,75283   | 0,0000000 | 0,0000000  |
| <b>Hvcn1</b>    | -1,7502179 | 0,0000000 | 0,0000000  |
| <b>Tuba1b</b>   | -1,7492275 | 0,0000000 | 0,0000000  |
| <b>Gm10357</b>  | -1,7479874 | 0,0003568 | 0,00008290 |
| <b>Gm21596</b>  | -1,7451742 | 0,0000001 | 0,00000002 |
| <b>Gm11349</b>  | -1,7429325 | 0,0000623 | 0,00001268 |
| <b>Xylb</b>     | -1,7415624 | 0,0000000 | 0,0000000  |
| <b>Gm43096</b>  | -1,7361797 | 0,0000000 | 0,0000000  |
| <b>Cep72</b>    | -1,7322786 | 0,0000000 | 0,0000000  |
| <b>Selenoh</b>  | -1,7315521 | 0,0000000 | 0,0000000  |
| <b>Gm37510</b>  | -1,7280946 | 0,0000012 | 0,00000020 |
| <b>Myb</b>      | -1,7262957 | 0,0007340 | 0,00018156 |
| <b>Rad51b</b>   | -1,7259414 | 0,0001479 | 0,00003188 |
| <b>Itpk1</b>    | -1,7240997 | 0,0000000 | 0,0000000  |
| <b>Tenm4</b>    | -1,7220576 | 0,0000000 | 0,0000000  |
| <b>Mboat1</b>   | -1,7207371 | 0,0000000 | 0,0000000  |
| <b>Kifc5b</b>   | -1,7194629 | 0,0000000 | 0,0000000  |
| <b>Cbx3-ps7</b> | -1,7129792 | 0,0000000 | 0,0000000  |
| <b>Enkd1</b>    | -1,7116408 | 0,0000000 | 0,0000000  |
| <b>Ezh2</b>     | -1,7096555 | 0,0000000 | 0,0000000  |
| <b>Alms1</b>    | -1,7064411 | 0,0000000 | 0,0000000  |
| <b>Fndc4</b>    | -1,7044673 | 0,0000000 | 0,0000000  |
| <b>Haus4</b>    | -1,7022229 | 0,0000000 | 0,0000000  |
| <b>Echdc2</b>   | -1,7006805 | 0,0000000 | 0,0000000  |
| <b>Rfc4</b>     | -1,6950347 | 0,0000000 | 0,0000000  |
| <b>Mnd1</b>     | -1,6939715 | 0,0000044 | 0,00000076 |
| <b>Gm36401</b>  | -1,6882516 | 0,0002056 | 0,00004544 |
| <b>Adamts20</b> | -1,6864591 | 0,0000000 | 0,0000000  |
| <b>H1f1</b>     | -1,6862726 | 0,0000008 | 0,00000012 |
| <b>Smo</b>      | -1,6862544 | 0,0000000 | 0,0000000  |
| <b>Gm43029</b>  | -1,6842704 | 0,0000002 | 0,00000003 |
| <b>Mnd1-ps</b>  | -1,6779191 | 0,0004737 | 0,00011281 |
| <b>Nsmce4a</b>  | -1,6772262 | 0,0000000 | 0,0000000  |
| <b>Hmgb1</b>    | -1,6751614 | 0,0000000 | 0,0000000  |
| <b>Lbr</b>      | -1,6710142 | 0,0000000 | 0,0000000  |
| <b>Nt5dc2</b>   | -1,6681306 | 0,0000000 | 0,0000000  |
| <b>Anln</b>     | -1,6664051 | 0,0000000 | 0,0000000  |
| <b>Parp1</b>    | -1,6661662 | 0,0000000 | 0,0000000  |
| <b>Zfp469</b>   | -1,6632062 | 0,0000000 | 0,0000000  |
| <b>Topbp1</b>   | -1,6593869 | 0,0000000 | 0,0000000  |
| <b>Gm5620</b>   | -1,6570692 | 0,0000000 | 0,0000000  |

|                      |            |           |            |
|----------------------|------------|-----------|------------|
| <b>Chek2</b>         | -1,6566106 | 0,0000000 | 0,0000000  |
| <b>Gm16436</b>       | -1,6523979 | 0,0010344 | 0,00026246 |
| <b>Hirip3</b>        | -1,6469574 | 0,0000000 | 0,0000000  |
| <b>Tnfaip811</b>     | -1,6440393 | 0,0000008 | 0,00000013 |
| <b>Tmem51</b>        | -1,6389469 | 0,0000000 | 0,0000000  |
| <b>Palb2</b>         | -1,6389381 | 0,0000000 | 0,0000000  |
| <b>Hmgb3</b>         | -1,6351362 | 0,0000000 | 0,0000000  |
| <b>Bra1</b>          | -1,6320397 | 0,0000000 | 0,0000000  |
| <b>Dcbld1</b>        | -1,6314189 | 0,0000000 | 0,0000000  |
| <b>Cdca7</b>         | -1,6310517 | 0,0000000 | 0,0000000  |
| <b>Galnt12</b>       | -1,6293282 | 0,0000000 | 0,0000000  |
| <b>5031439G07Rik</b> | -1,6281196 | 0,0000000 | 0,0000000  |
| <b>Cdc7</b>          | -1,6263398 | 0,0000000 | 0,0000000  |
| <b>Tfap4</b>         | -1,6152388 | 0,0000000 | 0,0000000  |
| <b>Cers1</b>         | -1,6149443 | 0,0000000 | 0,0000000  |
| <b>Hat1</b>          | -1,6144047 | 0,0000000 | 0,0000000  |
| <b>Wee1</b>          | -1,6127475 | 0,0000000 | 0,0000000  |
| <b>Macroh2a1</b>     | -1,6091532 | 0,0000000 | 0,0000000  |
| <b>Gm6104</b>        | -1,6080714 | 0,0000000 | 0,0000000  |
| <b>Kif24</b>         | -1,608055  | 0,0000000 | 0,0000000  |
| <b>Tmcc2</b>         | -1,6005149 | 0,0000000 | 0,0000000  |
| <b>Trim59</b>        | -1,5969864 | 0,0000000 | 0,0000000  |
| <b>Pyg1</b>          | -1,5937739 | 0,0000000 | 0,0000000  |
| <b>Slc16a3</b>       | -1,5936605 | 0,0002853 | 0,00006508 |
| <b>Dlk2</b>          | -1,5919667 | 0,0011430 | 0,00029216 |
| <b>Pola1</b>         | -1,5913261 | 0,0000000 | 0,0000000  |
| <b>Mms22l</b>        | -1,5901189 | 0,0000000 | 0,0000000  |
| <b>Gm28229</b>       | -1,5898851 | 0,0000000 | 0,0000000  |
| <b>Hells</b>         | -1,589837  | 0,0000000 | 0,0000000  |
| <b>Plch1</b>         | -1,5886979 | 0,0000000 | 0,0000000  |
| <b>Poc1b</b>         | -1,5871307 | 0,0000000 | 0,0000000  |
| <b>Gm17383</b>       | -1,5858665 | 0,0000000 | 0,0000000  |
| <b>Gm12870</b>       | -1,5840846 | 0,0005115 | 0,00012254 |
| <b>Hmcn1</b>         | -1,5815843 | 0,0000000 | 0,0000000  |
| <b>Usp1</b>          | -1,5811451 | 0,0000000 | 0,0000000  |
| <b>Cpne4</b>         | -1,5784176 | 0,0000000 | 0,0000000  |
| <b>Exosc8</b>        | -1,5690392 | 0,0000000 | 0,0000000  |
| <b>Ckap5</b>         | -1,568641  | 0,0000000 | 0,0000000  |
| <b>Dsn1</b>          | -1,563507  | 0,0000000 | 0,0000000  |
| <b>Mdm1</b>          | -1,5611608 | 0,0000000 | 0,0000000  |
| <b>H2ac21</b>        | -1,557662  | 0,0000300 | 0,00000579 |
| <b>Tnk2</b>          | -1,5540373 | 0,0000000 | 0,0000000  |

|                 |            |           |            |
|-----------------|------------|-----------|------------|
| <b>Degs2</b>    | -1,5536161 | 0,0009131 | 0,00022919 |
| <b>Skp2</b>     | -1,5533928 | 0,0000000 | 0,00000000 |
| <b>Gm11223</b>  | -1,5533413 | 0,0000000 | 0,00000000 |
| <b>Tipin</b>    | -1,5521749 | 0,0000000 | 0,00000000 |
| <b>Pcna-ps2</b> | -1,5448787 | 0,0000000 | 0,00000000 |
| <b>BC055324</b> | -1,5446362 | 0,0000000 | 0,00000000 |
| <b>Cgas</b>     | -1,5419054 | 0,0000000 | 0,00000000 |
| <b>Hip1r</b>    | -1,5415877 | 0,0000000 | 0,00000000 |
| <b>Mapk11</b>   | -1,5380426 | 0,0000000 | 0,00000000 |
| <b>Stmn1</b>    | -1,5377802 | 0,0000000 | 0,00000000 |
| <b>Tspan10</b>  | -1,536284  | 0,0000000 | 0,00000000 |
| <b>Pcna</b>     | -1,5358703 | 0,0000000 | 0,00000000 |
| <b>Ppid</b>     | -1,535447  | 0,0000000 | 0,00000000 |
| <b>Oip5</b>     | -1,5318855 | 0,0000000 | 0,00000000 |
| <b>Clmn</b>     | -1,5307064 | 0,0000000 | 0,00000000 |
| <b>Cbx2</b>     | -1,5264321 | 0,0000000 | 0,00000000 |
| <b>Mtfp1</b>    | -1,5254271 | 0,0000000 | 0,00000000 |
| <b>Sass6</b>    | -1,5246978 | 0,0000000 | 0,00000000 |
| <b>Kpna2</b>    | -1,5211598 | 0,0000000 | 0,00000000 |
| <b>Vrk1</b>     | -1,5202885 | 0,0000000 | 0,00000000 |
| <b>Gm10184</b>  | -1,5165647 | 0,0000000 | 0,00000000 |
| <b>Cenpl</b>    | -1,511139  | 0,0000000 | 0,00000000 |
| <b>Lmnb2</b>    | -1,5076918 | 0,0000000 | 0,00000000 |
| <b>Gm7931</b>   | -1,5072555 | 0,0001944 | 0,00004276 |
| <b>Net1</b>     | -1,5046169 | 0,0000000 | 0,00000000 |
| <b>Gm13577</b>  | -1,5005041 | 0,0000029 | 0,00000049 |
| <b>Vegfb</b>    | -1,4985282 | 0,0000000 | 0,00000000 |
| <b>Mt2</b>      | -1,4970963 | 0,0000018 | 0,00000029 |
| <b>Hsf4</b>     | -1,4959603 | 0,0000000 | 0,00000000 |
| <b>Cks1b</b>    | -1,4936192 | 0,0000000 | 0,00000000 |
| <b>Dek</b>      | -1,4903492 | 0,0000000 | 0,00000000 |
| <b>Pold2</b>    | -1,485098  | 0,0000000 | 0,00000000 |
| <b>Mtbp</b>     | -1,4840852 | 0,0000000 | 0,00000000 |
| <b>Fxn</b>      | -1,4813692 | 0,0000000 | 0,00000000 |
| <b>Mknk2</b>    | -1,4812741 | 0,0000000 | 0,00000000 |
| <b>Tamm41</b>   | -1,4804289 | 0,0000000 | 0,00000000 |
| <b>Egln1</b>    | -1,4776218 | 0,0000000 | 0,00000000 |
| <b>Paqr6</b>    | -1,4735791 | 0,0000001 | 0,00000002 |
| <b>Plekhg3</b>  | -1,4653316 | 0,0000000 | 0,00000000 |
| <b>Abca12</b>   | -1,4616558 | 0,0000000 | 0,00000000 |
| <b>Rcc1</b>     | -1,4611474 | 0,0000000 | 0,00000000 |
| <b>Ttf2</b>     | -1,4607659 | 0,0000000 | 0,00000000 |

|                      |            |           |            |
|----------------------|------------|-----------|------------|
| <b>Tubg1</b>         | -1,4531276 | 0,0000000 | 0,0000000  |
| <b>Cibar1</b>        | -1,4528908 | 0,0000000 | 0,0000000  |
| <b>Gpr157</b>        | -1,4479397 | 0,0000000 | 0,0000000  |
| <b>Nsd2</b>          | -1,4455873 | 0,0000000 | 0,0000000  |
| <b>Bicc1</b>         | -1,4403303 | 0,0000000 | 0,0000000  |
| <b>Hjurp</b>         | -1,4399345 | 0,0000000 | 0,0000000  |
| <b>Tubb5</b>         | -1,4395642 | 0,0000000 | 0,0000000  |
| <b>Sdf2l1</b>        | -1,4395565 | 0,0000000 | 0,0000000  |
| <b>Fbxo48</b>        | -1,4380346 | 0,0011562 | 0,00029591 |
| <b>Ntrk3</b>         | -1,4361224 | 0,0012000 | 0,00030833 |
| <b>Gm10619</b>       | -1,4354177 | 0,0012914 | 0,00033375 |
| <b>Rcor2</b>         | -1,4348554 | 0,0000000 | 0,0000000  |
| <b>Scn1a</b>         | -1,4338622 | 0,0000000 | 0,0000000  |
| <b>Cenpv</b>         | -1,4319954 | 0,0000000 | 0,0000000  |
| <b>Ccdc69</b>        | -1,4281036 | 0,0000001 | 0,00000002 |
| <b>Cep192</b>        | -1,427951  | 0,0000000 | 0,0000000  |
| <b>Dhfr</b>          | -1,4261833 | 0,0000000 | 0,0000000  |
| <b>Mreg</b>          | -1,4257182 | 0,0000000 | 0,0000000  |
| <b>Suv39h1</b>       | -1,4244619 | 0,0000000 | 0,0000000  |
| <b>Cerox1</b>        | -1,4244045 | 0,0015008 | 0,00039233 |
| <b>Gm14276</b>       | -1,4240307 | 0,0000001 | 0,00000001 |
| <b>Gm12919</b>       | -1,4207134 | 0,0004396 | 0,00010399 |
| <b>Psmc3ip</b>       | -1,4159314 | 0,0000000 | 0,0000000  |
| <b>Cep135</b>        | -1,4134982 | 0,0000000 | 0,0000000  |
| <b>Dck</b>           | -1,4107803 | 0,0000000 | 0,0000000  |
| <b>Rnaseh2b</b>      | -1,4064145 | 0,0000000 | 0,0000000  |
| <b>Fbln1</b>         | -1,4043517 | 0,0000000 | 0,0000000  |
| <b>Paxip1</b>        | -1,4022158 | 0,0000000 | 0,0000000  |
| <b>Ccdc57</b>        | -1,4000419 | 0,0000000 | 0,0000000  |
| <b>Terf1</b>         | -1,3990442 | 0,0000000 | 0,0000000  |
| <b>Psen2</b>         | -1,3988194 | 0,0000000 | 0,0000000  |
| <b>Igsf8</b>         | -1,3986751 | 0,0000000 | 0,0000000  |
| <b>Pdk1</b>          | -1,3979763 | 0,0000154 | 0,00000282 |
| <b>Pold3</b>         | -1,3976708 | 0,0000000 | 0,0000000  |
| <b>Slfn9</b>         | -1,3952052 | 0,0000000 | 0,0000000  |
| <b>Tmem109</b>       | -1,3912244 | 0,0000000 | 0,0000000  |
| <b>Rttm</b>          | -1,3904136 | 0,0000000 | 0,0000000  |
| <b>Afap1l1</b>       | -1,3894963 | 0,0000000 | 0,0000000  |
| <b>Bckdhb</b>        | -1,3832128 | 0,0000000 | 0,0000000  |
| <b>Tjp2</b>          | -1,3827337 | 0,0000000 | 0,0000000  |
| <b>Gm14150</b>       | -1,3817134 | 0,0000000 | 0,0000000  |
| <b>D630045J12Rik</b> | -1,3798563 | 0,0000000 | 0,0000000  |

|                      |            |           |            |
|----------------------|------------|-----------|------------|
| <b>Bhlhe40</b>       | -1,3757357 | 0,0000000 | 0,0000000  |
| <b>Dnph1</b>         | -1,37455   | 0,0000000 | 0,0000000  |
| <b>Plekhg5</b>       | -1,373761  | 0,0000000 | 0,0000000  |
| <b>Cntrob</b>        | -1,3733027 | 0,0000000 | 0,0000000  |
| <b>Cbx3-ps6</b>      | -1,37235   | 0,0000000 | 0,0000000  |
| <b>Gas2l3</b>        | -1,369141  | 0,0000000 | 0,0000000  |
| <b>Gm10074</b>       | -1,3670756 | 0,0000000 | 0,0000000  |
| <b>Slc29a1</b>       | -1,3624428 | 0,0000000 | 0,0000000  |
| <b>Tmem268</b>       | -1,3603658 | 0,0000000 | 0,0000000  |
| <b>Cntln</b>         | -1,356192  | 0,0002693 | 0,00006106 |
| <b>Tube1</b>         | -1,3496785 | 0,0000002 | 0,00000003 |
| <b>Cars2</b>         | -1,3485028 | 0,0000000 | 0,0000000  |
| <b>Ncapd3</b>        | -1,343735  | 0,0000000 | 0,0000000  |
| <b>RbmX</b>          | -1,3414642 | 0,0000000 | 0,0000000  |
| <b>Metrn</b>         | -1,3399493 | 0,0000020 | 0,00000032 |
| <b>2810410L24Rik</b> | -1,3399056 | 0,0000003 | 0,00000005 |
| <b>Bcl7a</b>         | -1,3395675 | 0,0000000 | 0,0000000  |
| <b>McpH1</b>         | -1,3370937 | 0,0000000 | 0,0000000  |
| <b>Haus1</b>         | -1,3350358 | 0,0000000 | 0,0000000  |
| <b>Gpr143</b>        | -1,3345582 | 0,0000000 | 0,0000000  |
| <b>Wdr90</b>         | -1,3343104 | 0,0000000 | 0,0000000  |
| <b>Prkcz</b>         | -1,3342679 | 0,0000000 | 0,0000000  |
| <b>Brca2</b>         | -1,3289344 | 0,0000000 | 0,0000000  |
| <b>Aff3</b>          | -1,3270444 | 0,0000000 | 0,0000000  |
| <b>Cdca7l</b>        | -1,3269764 | 0,0000000 | 0,0000000  |
| <b>Pkp4</b>          | -1,3238606 | 0,0000000 | 0,0000000  |
| <b>Fam184b</b>       | -1,322853  | 0,0000000 | 0,0000000  |
| <b>Arhgef37</b>      | -1,3224172 | 0,0002161 | 0,00004797 |
| <b>Fen1</b>          | -1,3220808 | 0,0000149 | 0,00000273 |
| <b>Mt1</b>           | -1,3206777 | 0,0000017 | 0,00000028 |
| <b>Lin9</b>          | -1,3176814 | 0,0000000 | 0,0000000  |
| <b>Kdm2b</b>         | -1,3173155 | 0,0000000 | 0,0000000  |
| <b>Thra</b>          | -1,3169475 | 0,0000000 | 0,0000000  |
| <b>Eogt</b>          | -1,3168114 | 0,0000000 | 0,0000000  |
| <b>Gm8146</b>        | -1,3148394 | 0,0003076 | 0,00007059 |
| <b>Tal1</b>          | -1,3139247 | 0,0000060 | 0,00000106 |
| <b>Tnfsf9</b>        | -1,312176  | 0,0000000 | 0,0000000  |
| <b>4930579G24Rik</b> | -1,3093117 | 0,0000000 | 0,0000000  |
| <b>Msh6</b>          | -1,3063047 | 0,0000000 | 0,0000000  |
| <b>Ifrd2</b>         | -1,302833  | 0,0000000 | 0,0000000  |
| <b>Pwwp3a</b>        | -1,2972639 | 0,0000000 | 0,0000000  |
| <b>Kmt5a</b>         | -1,2972367 | 0,0000000 | 0,0000000  |

|                      |            |           |            |
|----------------------|------------|-----------|------------|
| <b>Gm11585</b>       | -1,2956657 | 0,0000000 | 0,0000000  |
| <b>Pde9a</b>         | -1,2953117 | 0,0000001 | 0,00000002 |
| <b>Gm42549</b>       | -1,2950817 | 0,0018740 | 0,00049997 |
| <b>Parvb</b>         | -1,2907131 | 0,0000000 | 0,00000000 |
| <b>Uchl5</b>         | -1,2906329 | 0,0000000 | 0,00000000 |
| <b>Hunk</b>          | -1,2855301 | 0,0000000 | 0,00000000 |
| <b>Thrap3</b>        | -1,2846699 | 0,0000000 | 0,00000000 |
| <b>Odf2</b>          | -1,2834141 | 0,0000000 | 0,00000000 |
| <b>Tedc1</b>         | -1,2833681 | 0,0000000 | 0,00000000 |
| <b>Ybx3</b>          | -1,2810631 | 0,0000000 | 0,00000000 |
| <b>Alg13</b>         | -1,2798782 | 0,0000000 | 0,00000000 |
| <b>Gm5841</b>        | -1,2797041 | 0,0000017 | 0,00000027 |
| <b>Cyp39a1</b>       | -1,2792588 | 0,0000000 | 0,00000000 |
| <b>A930004J17Rik</b> | -1,2789907 | 0,0001261 | 0,00002692 |
| <b>Paqr4</b>         | -1,2786124 | 0,0000000 | 0,00000000 |
| <b>Anp32b</b>        | -1,2748199 | 0,0000000 | 0,00000000 |
| <b>Vars</b>          | -1,2744722 | 0,0000000 | 0,00000000 |
| <b>Eps8</b>          | -1,2732668 | 0,0000000 | 0,00000000 |
| <b>Slf1</b>          | -1,2715996 | 0,0000000 | 0,00000000 |
| <b>Prdm16</b>        | -1,2658516 | 0,0000000 | 0,00000000 |
| <b>Dnajc3</b>        | -1,2639504 | 0,0000000 | 0,00000000 |
| <b>Tcof1</b>         | -1,2604584 | 0,0000000 | 0,00000000 |
| <b>Cenpp</b>         | -1,2570019 | 0,0000000 | 0,00000000 |
| <b>Ccdc88c</b>       | -1,2560564 | 0,0000000 | 0,00000000 |
| <b>Rad21</b>         | -1,2556611 | 0,0000000 | 0,00000000 |
| <b>Ube2s</b>         | -1,2549193 | 0,0000000 | 0,00000000 |
| <b>Foxd2os</b>       | -1,2542571 | 0,0000009 | 0,00000014 |
| <b>Mroh2a</b>        | -1,2534542 | 0,0000002 | 0,00000004 |
| <b>Zbed3</b>         | -1,2520683 | 0,0000000 | 0,00000000 |
| <b>Gm4617</b>        | -1,2473962 | 0,0000000 | 0,00000000 |
| <b>Dctpp1</b>        | -1,2449474 | 0,0000000 | 0,00000000 |
| <b>Nup85</b>         | -1,244719  | 0,0000000 | 0,00000000 |
| <b>Ccdc138</b>       | -1,2446733 | 0,0001174 | 0,00002492 |
| <b>Rab11fip4</b>     | -1,243218  | 0,0000000 | 0,00000000 |
| <b>Card14</b>        | -1,2430993 | 0,0000000 | 0,00000000 |
| <b>Ska2</b>          | -1,2372181 | 0,0000000 | 0,00000000 |
| <b>Nrm</b>           | -1,2327228 | 0,0000002 | 0,00000002 |
| <b>Srrt</b>          | -1,2296633 | 0,0000000 | 0,00000000 |
| <b>Pfkl</b>          | -1,2293757 | 0,0000000 | 0,00000000 |
| <b>2010204K13Rik</b> | -1,229308  | 0,0000000 | 0,00000000 |
| <b>Gm5898</b>        | -1,2292594 | 0,0000000 | 0,00000000 |
| <b>Gm9800</b>        | -1,2284225 | 0,0000000 | 0,00000000 |

|                      |            |           |            |
|----------------------|------------|-----------|------------|
| <b>Rangap1</b>       | -1,2256575 | 0,0000000 | 0,0000000  |
| <b>Ankrd44</b>       | -1,2248737 | 0,0000000 | 0,0000000  |
| <b>6720489N17Rik</b> | -1,2242665 | 0,0000492 | 0,00000983 |
| <b>Rasd2</b>         | -1,2238508 | 0,0001161 | 0,00002461 |
| <b>Insc</b>          | -1,223542  | 0,0000000 | 0,0000000  |
| <b>Axin2</b>         | -1,2215192 | 0,0000006 | 0,00000009 |
| <b>Tfdp1</b>         | -1,220881  | 0,0000000 | 0,0000000  |
| <b>Evc</b>           | -1,2177802 | 0,0000000 | 0,0000000  |
| <b>Polr3g</b>        | -1,2175973 | 0,0000000 | 0,0000000  |
| <b>Gm5903</b>        | -1,2175243 | 0,0000000 | 0,0000000  |
| <b>Galk1</b>         | -1,2165457 | 0,0000000 | 0,0000000  |
| <b>Suv39h2</b>       | -1,2161961 | 0,0000000 | 0,0000000  |
| <b>Paics</b>         | -1,2158727 | 0,0000000 | 0,0000000  |
| <b>D130058E05Rik</b> | -1,2151701 | 0,0000000 | 0,0000000  |
| <b>AU020206</b>      | -1,2137479 | 0,0000000 | 0,0000000  |
| <b>Gm16216</b>       | -1,2130903 | 0,0017127 | 0,00045300 |
| <b>Zfp651</b>        | -1,2055753 | 0,0000000 | 0,0000000  |
| <b>Epop</b>          | -1,2054813 | 0,0000000 | 0,0000000  |
| <b>Pcnt</b>          | -1,2049721 | 0,0000000 | 0,0000000  |
| <b>Lpcat1</b>        | -1,2045146 | 0,0000000 | 0,0000000  |
| <b>4930526A20Rik</b> | -1,2025551 | 0,0000071 | 0,00000126 |
| <b>Idh2</b>          | -1,201506  | 0,0000000 | 0,0000000  |
| <b>C77080</b>        | -1,2014944 | 0,0005002 | 0,00011961 |
| <b>H3c15</b>         | -1,2005739 | 0,0000155 | 0,00000285 |
| <b>Ssbp4</b>         | -1,200562  | 0,0000000 | 0,0000000  |
| <b>Exosc2</b>        | -1,196803  | 0,0000000 | 0,0000000  |
| <b>Gm4430</b>        | -1,1947201 | 0,0002126 | 0,00004711 |
| <b>Miip</b>          | -1,1942858 | 0,0000000 | 0,0000000  |
| <b>Scrib</b>         | -1,1925872 | 0,0000000 | 0,0000000  |
| <b>Bri3bp</b>        | -1,1902453 | 0,0000000 | 0,0000000  |
| <b>Bri3</b>          | -1,1899258 | 0,0000000 | 0,0000000  |
| <b>Hk2</b>           | -1,1881508 | 0,0000000 | 0,0000000  |
| <b>Ccdc18</b>        | -1,1873121 | 0,0002536 | 0,00005712 |
| <b>H1f2</b>          | -1,1857038 | 0,0000000 | 0,0000000  |
| <b>Dhrs2</b>         | -1,1850438 | 0,0000000 | 0,0000000  |
| <b>Hyls1</b>         | -1,1848636 | 0,0000000 | 0,0000000  |
| <b>Bsn</b>           | -1,1837534 | 0,0000000 | 0,0000000  |
| <b>Aif1l</b>         | -1,1780457 | 0,0000000 | 0,0000000  |
| <b>Zfp382</b>        | -1,1770634 | 0,0000001 | 0,00000001 |
| <b>Etaa1</b>         | -1,1757215 | 0,0000000 | 0,0000000  |
| <b>Itga9</b>         | -1,175323  | 0,0000000 | 0,0000000  |
| <b>Car14</b>         | -1,1736306 | 0,0000000 | 0,0000000  |

|                 |            |           |            |
|-----------------|------------|-----------|------------|
| <b>Tmem50b</b>  | -1,1722466 | 0,0000000 | 0,0000000  |
| <b>Dstyk</b>    | -1,1717213 | 0,0000000 | 0,0000000  |
| <b>Tpgs2</b>    | -1,168591  | 0,0000000 | 0,0000000  |
| <b>Gm26448</b>  | -1,1682897 | 0,0000000 | 0,0000000  |
| <b>Haus5</b>    | -1,1662879 | 0,0002577 | 0,00005811 |
| <b>G2e3</b>     | -1,16546   | 0,0000000 | 0,0000000  |
| <b>Tsen34</b>   | -1,1650226 | 0,0000000 | 0,0000000  |
| <b>Aph1c</b>    | -1,1636941 | 0,0000000 | 0,0000000  |
| <b>Rfc2</b>     | -1,1634602 | 0,0000000 | 0,0000000  |
| <b>Rfwd3</b>    | -1,1624836 | 0,0000000 | 0,0000000  |
| <b>Gm8652</b>   | -1,1621373 | 0,0007334 | 0,00018136 |
| <b>Dhrs13</b>   | -1,1618901 | 0,0000000 | 0,0000000  |
| <b>Hs3st1</b>   | -1,1601112 | 0,0007028 | 0,00017292 |
| <b>Dct</b>      | -1,1580833 | 0,0000000 | 0,0000000  |
| <b>Nin</b>      | -1,1574237 | 0,0000000 | 0,0000000  |
| <b>Tcf3</b>     | -1,1571831 | 0,0000000 | 0,0000000  |
| <b>Siah1b</b>   | -1,1555065 | 0,0000010 | 0,00000016 |
| <b>Csrnp2</b>   | -1,1546465 | 0,0000000 | 0,0000000  |
| <b>Cmtm5</b>    | -1,1544423 | 0,0007196 | 0,00017771 |
| <b>Rnf26</b>    | -1,1520139 | 0,0000000 | 0,0000000  |
| <b>Ryr3</b>     | -1,1513524 | 0,0000028 | 0,00000047 |
| <b>Klf15</b>    | -1,1512752 | 0,0000000 | 0,0000000  |
| <b>Gm11246</b>  | -1,1500511 | 0,0000102 | 0,00000183 |
| <b>Gnptab</b>   | -1,1491453 | 0,0000000 | 0,0000000  |
| <b>Mipol1</b>   | -1,1477726 | 0,0000000 | 0,0000000  |
| <b>Kit</b>      | -1,1473852 | 0,0000000 | 0,0000000  |
| <b>Kif26a</b>   | -1,1465698 | 0,0001646 | 0,00003581 |
| <b>Zw10</b>     | -1,1459843 | 0,0000000 | 0,0000000  |
| <b>Lsm5</b>     | -1,1457486 | 0,0000000 | 0,0000000  |
| <b>Fam111a</b>  | -1,1444437 | 0,0000000 | 0,0000000  |
| <b>Grk6</b>     | -1,1441873 | 0,0000000 | 0,0000000  |
| <b>Fkbp11</b>   | -1,1427024 | 0,0000000 | 0,00000001 |
| <b>Med12l</b>   | -1,1395644 | 0,0000000 | 0,0000000  |
| <b>Evl</b>      | -1,1392006 | 0,0000000 | 0,0000000  |
| <b>Ano3</b>     | -1,1348132 | 0,0000000 | 0,0000000  |
| <b>Hsp90b1</b>  | -1,1318835 | 0,0000000 | 0,0000000  |
| <b>Ephb4</b>    | -1,1302456 | 0,0000000 | 0,0000000  |
| <b>Ppp1r16b</b> | -1,1300929 | 0,0000000 | 0,0000000  |
| <b>Cfap20</b>   | -1,1291675 | 0,0000000 | 0,0000000  |
| <b>Hpgds</b>    | -1,1291641 | 0,0000000 | 0,0000000  |
| <b>Dixdc1</b>   | -1,1240565 | 0,0000000 | 0,0000000  |
| <b>Pou6f1</b>   | -1,1240087 | 0,0000000 | 0,0000000  |



|                      |            |           |            |
|----------------------|------------|-----------|------------|
| <b>Zmiz2</b>         | -1,121528  | 0,0000000 | 0,00000000 |
| <b>Cpsf6</b>         | -1,1201555 | 0,0000000 | 0,00000000 |
| <b>Adi1</b>          | -1,1192466 | 0,0000000 | 0,00000000 |
| <b>Rfc3</b>          | -1,1192048 | 0,0000000 | 0,00000000 |
| <b>Gm9256</b>        | -1,118874  | 0,0001437 | 0,00003093 |
| <b>Mbd4</b>          | -1,1187781 | 0,0000000 | 0,00000000 |
| <b>Epb4114b</b>      | -1,1175525 | 0,0000019 | 0,00000031 |
| <b>Ptma</b>          | -1,1173661 | 0,0000000 | 0,00000000 |
| <b>Sms-ps</b>        | -1,116643  | 0,0000000 | 0,00000000 |
| <b>Lpgat1</b>        | -1,1157473 | 0,0000000 | 0,00000000 |
| <b>Mlt6</b>          | -1,1156103 | 0,0000000 | 0,00000000 |
| <b>Tbc1d31</b>       | -1,1151057 | 0,0000000 | 0,00000000 |
| <b>Rbm14</b>         | -1,1149604 | 0,0000000 | 0,00000000 |
| <b>Xndc1</b>         | -1,1140353 | 0,0000688 | 0,00001411 |
| <b>Prim2</b>         | -1,1121768 | 0,0000000 | 0,00000000 |
| <b>L3hypdh</b>       | -1,1097059 | 0,0000000 | 0,00000000 |
| <b>Uaca</b>          | -1,1094839 | 0,0000000 | 0,00000000 |
| <b>Alyref</b>        | -1,1094653 | 0,0000000 | 0,00000000 |
| <b>Preli2</b>        | -1,1088639 | 0,0000026 | 0,00000043 |
| <b>Cdc42ep5</b>      | -1,1073064 | 0,0000000 | 0,00000000 |
| <b>Dennd11</b>       | -1,1056225 | 0,0000000 | 0,00000001 |
| <b>Cdkn2d</b>        | -1,1044749 | 0,0000000 | 0,00000000 |
| <b>Cep295</b>        | -1,1040759 | 0,0000000 | 0,00000000 |
| <b>Chd11</b>         | -1,1021139 | 0,0000000 | 0,00000000 |
| <b>Ragef1</b>        | -1,1006912 | 0,0000000 | 0,00000000 |
| <b>Gm4204</b>        | -1,1004745 | 0,0000000 | 0,00000000 |
| <b>Rtel1</b>         | -1,1002668 | 0,0000000 | 0,00000000 |
| <b>Mphosph9</b>      | -1,0997624 | 0,0000000 | 0,00000000 |
| <b>Rab27a</b>        | -1,0995786 | 0,0000000 | 0,00000000 |
| <b>Pdia4</b>         | -1,0991713 | 0,0000000 | 0,00000000 |
| <b>Mcmbp</b>         | -1,0987098 | 0,0000000 | 0,00000000 |
| <b>Celsr2</b>        | -1,0985377 | 0,0000000 | 0,00000000 |
| <b>Srm</b>           | -1,0983752 | 0,0000000 | 0,00000000 |
| <b>Scml2</b>         | -1,0983454 | 0,0011238 | 0,00028687 |
| <b>St6galnac3</b>    | -1,0974567 | 0,0000000 | 0,00000000 |
| <b>Reep4</b>         | -1,0969022 | 0,0000000 | 0,00000000 |
| <b>Cbx3</b>          | -1,095573  | 0,0000000 | 0,00000000 |
| <b>C330018A13Rik</b> | -1,0937059 | 0,0000573 | 0,00001159 |
| <b>Sc1t1</b>         | -1,0936687 | 0,0000001 | 0,00000001 |
| <b>Crocc</b>         | -1,0927178 | 0,0000000 | 0,00000000 |
| <b>Mdc1</b>          | -1,0921785 | 0,0000000 | 0,00000000 |
| <b>Zfp395</b>        | -1,0919161 | 0,0000001 | 0,00000001 |

|                      |            |           |            |
|----------------------|------------|-----------|------------|
| <b>Mbnl3</b>         | -1,0916495 | 0,0000000 | 0,0000000  |
| <b>Ak3l2-ps</b>      | -1,0912183 | 0,0001080 | 0,00002280 |
| <b>Gxylt1</b>        | -1,088497  | 0,0000000 | 0,0000000  |
| <b>Ppp5c</b>         | -1,0877707 | 0,0000000 | 0,0000000  |
| <b>Msh2</b>          | -1,0873271 | 0,0000000 | 0,0000000  |
| <b>Myo5a</b>         | -1,0872796 | 0,0000000 | 0,0000000  |
| <b>Telo2</b>         | -1,0872066 | 0,0000000 | 0,0000000  |
| <b>Adamts10</b>      | -1,0857418 | 0,0000000 | 0,0000000  |
| <b>L3mbtl2</b>       | -1,0845031 | 0,0000000 | 0,0000000  |
| <b>Lrrc4b</b>        | -1,0839927 | 0,0000000 | 0,0000000  |
| <b>Dpy30</b>         | -1,0836161 | 0,0000000 | 0,0000000  |
| <b>Mcm8</b>          | -1,0808227 | 0,0000000 | 0,0000000  |
| <b>Nup107</b>        | -1,0806382 | 0,0000000 | 0,0000000  |
| <b>Hmces</b>         | -1,0804799 | 0,0000000 | 0,0000000  |
| <b>Zc3hav1l</b>      | -1,0799935 | 0,0000000 | 0,0000000  |
| <b>Nup205</b>        | -1,0782937 | 0,0000000 | 0,0000000  |
| <b>Plxnd1</b>        | -1,077397  | 0,0000000 | 0,0000000  |
| <b>Prex2</b>         | -1,0771887 | 0,0000000 | 0,0000000  |
| <b>Slc45a2</b>       | -1,0756319 | 0,0000000 | 0,0000000  |
| <b>Nup37</b>         | -1,0754255 | 0,0000000 | 0,0000000  |
| <b>Rgma</b>          | -1,0752775 | 0,0000000 | 0,0000000  |
| <b>Arhgap10</b>      | -1,0747068 | 0,0000000 | 0,0000000  |
| <b>Sirpa</b>         | -1,074646  | 0,0000000 | 0,0000000  |
| <b>Dcps</b>          | -1,0722326 | 0,0000000 | 0,0000000  |
| <b>Arrb2</b>         | -1,0721591 | 0,0000000 | 0,0000000  |
| <b>Cyba</b>          | -1,0721098 | 0,0000000 | 0,0000000  |
| <b>Gm5643</b>        | -1,071088  | 0,0018403 | 0,00049018 |
| <b>Cln6</b>          | -1,0707426 | 0,0000000 | 0,0000000  |
| <b>Pdia6</b>         | -1,0702522 | 0,0000000 | 0,0000000  |
| <b>Gm10052</b>       | -1,0691454 | 0,0000000 | 0,0000000  |
| <b>Tpcn1</b>         | -1,0685825 | 0,0000000 | 0,0000000  |
| <b>Prps1</b>         | -1,068535  | 0,0000000 | 0,0000000  |
| <b>Rnaseh2a</b>      | -1,0684469 | 0,0000000 | 0,0000000  |
| <b>Gtf2h1</b>        | -1,06312   | 0,0000000 | 0,0000000  |
| <b>Srsf4</b>         | -1,0623892 | 0,0000000 | 0,0000000  |
| <b>Zcchc8</b>        | -1,0584608 | 0,0000000 | 0,0000000  |
| <b>Cfap298</b>       | -1,0582918 | 0,0000000 | 0,0000000  |
| <b>Nup210l</b>       | -1,0572988 | 0,0017713 | 0,00046985 |
| <b>Pnn</b>           | -1,0572476 | 0,0000000 | 0,0000000  |
| <b>Palm</b>          | -1,0571799 | 0,0000000 | 0,0000000  |
| <b>1700019D03Rik</b> | -1,0571096 | 0,0014655 | 0,00038268 |
| <b>Baz1b</b>         | -1,0568089 | 0,0000000 | 0,0000000  |

|                      |            |           |            |
|----------------------|------------|-----------|------------|
| <b>Gm6682</b>        | -1,0546043 | 0,0000041 | 0,00000069 |
| <b>Gins3</b>         | -1,0544405 | 0,0000000 | 0,00000000 |
| <b>Col9a1</b>        | -1,0542262 | 0,0000709 | 0,00001456 |
| <b>Gm6166</b>        | -1,053476  | 0,0000000 | 0,00000000 |
| <b>Atm</b>           | -1,0523103 | 0,0000000 | 0,00000000 |
| <b>Fgd1</b>          | -1,0500457 | 0,0000000 | 0,00000000 |
| <b>Sh3bp1</b>        | -1,0499706 | 0,0000000 | 0,00000000 |
| <b>Spes3</b>         | -1,0493956 | 0,0000000 | 0,00000000 |
| <b>Zkscan17</b>      | -1,0486253 | 0,0000000 | 0,00000000 |
| <b>Fzr1</b>          | -1,0485424 | 0,0000000 | 0,00000000 |
| <b>Fbxo31</b>        | -1,0484582 | 0,0000000 | 0,00000000 |
| <b>G0s2</b>          | -1,0478461 | 0,0000671 | 0,00001373 |
| <b>Cmc2</b>          | -1,0451193 | 0,0000000 | 0,00000000 |
| <b>Tuba1c</b>        | -1,0450986 | 0,0000000 | 0,00000000 |
| <b>Stau2</b>         | -1,0446402 | 0,0000000 | 0,00000000 |
| <b>3110082I17Rik</b> | -1,0445583 | 0,0000000 | 0,00000000 |
| <b>Nolc1</b>         | -1,0444056 | 0,0000000 | 0,00000000 |
| <b>Ttbk1</b>         | -1,0436792 | 0,0000000 | 0,00000000 |
| <b>Cfap410</b>       | -1,0424364 | 0,0000000 | 0,00000000 |
| <b>Snrpa1</b>        | -1,041913  | 0,0000000 | 0,00000000 |
| <b>Ckap2</b>         | -1,0410329 | 0,0000000 | 0,00000000 |
| <b>Gm11353</b>       | -1,0402162 | 0,0004100 | 0,00009642 |
| <b>Hnrnpab</b>       | -1,0399136 | 0,0000000 | 0,00000000 |
| <b>Zik1</b>          | -1,0394104 | 0,0000000 | 0,00000000 |
| <b>Gnb1l</b>         | -1,0391121 | 0,0000066 | 0,00000115 |
| <b>Nfkbib</b>        | -1,0389637 | 0,0000000 | 0,00000000 |
| <b>Pgam1-ps2</b>     | -1,0367433 | 0,0000000 | 0,00000000 |
| <b>Mrpl12</b>        | -1,0367387 | 0,0000000 | 0,00000000 |
| <b>Slc7a5</b>        | -1,0365982 | 0,0000000 | 0,00000000 |
| <b>Donson</b>        | -1,036301  | 0,0000000 | 0,00000000 |
| <b>Gm7846</b>        | -1,033654  | 0,0000006 | 0,00000009 |
| <b>Nova1</b>         | -1,033082  | 0,0000036 | 0,00000061 |
| <b>Elapor2</b>       | -1,0319341 | 0,0000013 | 0,00000020 |
| <b>Zmynd19</b>       | -1,030808  | 0,0000000 | 0,00000000 |
| <b>Get4</b>          | -1,029791  | 0,0000000 | 0,00000000 |
| <b>Sec61a2</b>       | -1,0296645 | 0,0000000 | 0,00000000 |
| <b>Nfya</b>          | -1,0295983 | 0,0000000 | 0,00000000 |
| <b>Fam53b</b>        | -1,029552  | 0,0000000 | 0,00000000 |
| <b>Ncaph2</b>        | -1,0295335 | 0,0000000 | 0,00000000 |
| <b>Ddx39a</b>        | -1,0279413 | 0,0000000 | 0,00000000 |
| <b>1700066M21Rik</b> | -1,0269416 | 0,0000001 | 0,00000002 |
| <b>Nt5c2</b>         | -1,0239182 | 0,0000000 | 0,00000000 |

|                      |            |           |            |
|----------------------|------------|-----------|------------|
| <b>Arfgef3</b>       | -1,0236564 | 0,0000000 | 0,0000000  |
| <b>Cort</b>          | -1,0235975 | 0,0008348 | 0,00020841 |
| <b>2700038G22Rik</b> | -1,0231082 | 0,0000192 | 0,00000359 |
| <b>Lsm2</b>          | -1,0226708 | 0,0000000 | 0,00000000 |
| <b>Epb41</b>         | -1,0223414 | 0,0000000 | 0,00000000 |
| <b>Pgap1</b>         | -1,0207285 | 0,0000000 | 0,00000000 |
| <b>Mif-ps4</b>       | -1,0205697 | 0,0000000 | 0,00000000 |
| <b>Nap1l1</b>        | -1,0190144 | 0,0000000 | 0,00000000 |
| <b>Stk39</b>         | -1,0179488 | 0,0000000 | 0,00000000 |
| <b>Dnaaf2</b>        | -1,0166116 | 0,0000000 | 0,00000000 |
| <b>Epm2a</b>         | -1,0161448 | 0,0015183 | 0,00039757 |
| <b>Fut10</b>         | -1,0158727 | 0,0000000 | 0,00000000 |
| <b>Lrrc8b</b>        | -1,0143428 | 0,0000000 | 0,00000000 |
| <b>4930503L19Rik</b> | -1,014311  | 0,0000000 | 0,00000000 |
| <b>Sgsm2</b>         | -1,0137992 | 0,0000000 | 0,00000000 |
| <b>Slc9a5</b>        | -1,0134848 | 0,0005455 | 0,00013151 |
| <b>Casp8ap2</b>      | -1,0131164 | 0,0000000 | 0,00000000 |
| <b>Lmx1b</b>         | -1,0121199 | 0,0000000 | 0,00000000 |
| <b>Rpa1</b>          | -1,0119965 | 0,0000000 | 0,00000000 |
| <b>Orc6</b>          | -1,0116128 | 0,0000000 | 0,00000000 |
| <b>Prag1</b>         | -1,0104798 | 0,0000000 | 0,00000000 |
| <b>Plekha8</b>       | -1,0094914 | 0,0000000 | 0,00000000 |
| <b>Smc5</b>          | -1,0086911 | 0,0000000 | 0,00000000 |
| <b>Sae1</b>          | -1,0058299 | 0,0000000 | 0,00000000 |
| <b>Sfpq</b>          | -1,0030329 | 0,0000000 | 0,00000000 |
| <b>Myo1h</b>         | -1,0029867 | 0,0005711 | 0,00013816 |
| <b>Myc</b>           | -1,0012896 | 0,0000000 | 0,00000000 |
| <b>Srsf7</b>         | -1,0010466 | 0,0000000 | 0,00000000 |
| <b>Tex30</b>         | -1,0008965 | 0,0000000 | 0,00000000 |
| <b>Dusp8</b>         | 1,00043071 | 0,0000000 | 0,00000001 |
| <b>Zdhhc1</b>        | 1,00063261 | 0,0004801 | 0,00011450 |
| <b>Micall2</b>       | 1,00124565 | 0,0000001 | 0,00000002 |
| <b>Tmco6</b>         | 1,00168131 | 0,0003875 | 0,00009078 |
| <b>Myl12a</b>        | 1,00294026 | 0,0000000 | 0,00000000 |
| <b>Zwint</b>         | 1,00372494 | 0,0000000 | 0,00000000 |
| <b>Slc35d2</b>       | 1,00555842 | 0,0000755 | 0,00001559 |
| <b>Jrkl</b>          | 1,00725244 | 0,0000108 | 0,00000195 |
| <b>Glt8d1</b>        | 1,00812199 | 0,0000000 | 0,00000000 |
| <b>Maff</b>          | 1,00871755 | 0,0000002 | 0,00000003 |
| <b>Tefm</b>          | 1,00942985 | 0,0000000 | 0,00000000 |
| <b>Psme1</b>         | 1,01066735 | 0,0000000 | 0,00000000 |
| <b>Gm7809</b>        | 1,01246776 | 0,0000000 | 0,00000000 |

|                      |            |           |            |
|----------------------|------------|-----------|------------|
| <b>Car8</b>          | 1,01629641 | 0,0013296 | 0,00034446 |
| <b>B230354K17Rik</b> | 1,01634553 | 0,0000000 | 0,00000000 |
| <b>Enpp1</b>         | 1,0166091  | 0,0008810 | 0,00022062 |
| <b>E130311K13Rik</b> | 1,01717476 | 0,0000154 | 0,00000282 |
| <b>Coq8a</b>         | 1,01792993 | 0,0000000 | 0,00000000 |
| <b>Hmgs1</b>         | 1,0187606  | 0,0000000 | 0,00000000 |
| <b>Snpc5</b>         | 1,01896769 | 0,0000000 | 0,00000000 |
| <b>Snhg15</b>        | 1,01980249 | 0,0000000 | 0,00000000 |
| <b>Eola1</b>         | 1,02174124 | 0,0000006 | 0,00000009 |
| <b>Zfp945</b>        | 1,0219967  | 0,0000000 | 0,00000000 |
| <b>Rcan1</b>         | 1,02249313 | 0,0000000 | 0,00000000 |
| <b>Lrp1</b>          | 1,02448807 | 0,0000000 | 0,00000000 |
| <b>Arhgap28</b>      | 1,02473254 | 0,0000000 | 0,00000000 |
| <b>Nagk</b>          | 1,02570307 | 0,0000000 | 0,00000000 |
| <b>Ccnd2</b>         | 1,02579263 | 0,0000000 | 0,00000000 |
| <b>Tspo</b>          | 1,02605972 | 0,0000000 | 0,00000000 |
| <b>Abca7</b>         | 1,02668339 | 0,0000000 | 0,00000000 |
| <b>2310039H08Rik</b> | 1,02777739 | 0,0000000 | 0,00000000 |
| <b>Gale</b>          | 1,02797158 | 0,0000000 | 0,00000000 |
| <b>Crabp2</b>        | 1,02875202 | 0,0002121 | 0,00004697 |
| <b>Qsox1</b>         | 1,02897424 | 0,0000000 | 0,00000000 |
| <b>Ctxn1</b>         | 1,0291022  | 0,0000000 | 0,00000000 |
| <b>Speg</b>          | 1,0296234  | 0,0000000 | 0,00000000 |
| <b>Stat3</b>         | 1,03123086 | 0,0000000 | 0,00000000 |
| <b>3000002C10Rik</b> | 1,0319459  | 0,0004025 | 0,00009452 |
| <b>Klf6</b>          | 1,03241875 | 0,0000000 | 0,00000000 |
| <b>Pdp1</b>          | 1,03420544 | 0,0000062 | 0,00000108 |
| <b>Oaz2</b>          | 1,03433967 | 0,0000000 | 0,00000000 |
| <b>Lipa</b>          | 1,03494437 | 0,0000000 | 0,00000000 |
| <b>Ston1</b>         | 1,03706152 | 0,0000000 | 0,00000000 |
| <b>Runx1</b>         | 1,03720356 | 0,0000000 | 0,00000000 |
| <b>Rmdn2</b>         | 1,03805536 | 0,0000002 | 0,00000003 |
| <b>Klrg2</b>         | 1,03974083 | 0,0002670 | 0,00006047 |
| <b>Zswim6</b>        | 1,04005295 | 0,0000000 | 0,00000000 |
| <b>Zbtb38</b>        | 1,04033607 | 0,0000000 | 0,00000000 |
| <b>Psbm10</b>        | 1,04085487 | 0,0000000 | 0,00000000 |
| <b>Kctd21</b>        | 1,04119582 | 0,0015294 | 0,00040068 |
| <b>Col20a1</b>       | 1,04160583 | 0,0000191 | 0,00000356 |
| <b>Decr2</b>         | 1,04162029 | 0,0000000 | 0,00000000 |
| <b>Tapbpl</b>        | 1,04236044 | 0,0000051 | 0,00000088 |
| <b>Tgfb2</b>         | 1,04271052 | 0,0000000 | 0,00000000 |
| <b>Tpm1</b>          | 1,04329331 | 0,0000000 | 0,00000000 |

|                 |            |           |            |
|-----------------|------------|-----------|------------|
| <b>Ccdc73</b>   | 1,04330855 | 0,0004311 | 0,00010171 |
| <b>Zfp119b</b>  | 1,0447741  | 0,0001152 | 0,00002440 |
| <b>F8a</b>      | 1,04514077 | 0,0000008 | 0,00000013 |
| <b>Cfap157</b>  | 1,0451841  | 0,0011030 | 0,00028110 |
| <b>Hint2</b>    | 1,05067008 | 0,0000001 | 0,00000001 |
| <b>Efcab2</b>   | 1,0533849  | 0,0000007 | 0,00000011 |
| <b>Itpripl2</b> | 1,0534968  | 0,0000000 | 0,00000000 |
| <b>Dcaf8l</b>   | 1,05416709 | 0,0000000 | 0,00000000 |
| <b>Btg1</b>     | 1,05429467 | 0,0000000 | 0,00000000 |
| <b>Hpcal1</b>   | 1,05704661 | 0,0000000 | 0,00000000 |
| <b>Serpib6a</b> | 1,05714632 | 0,0000000 | 0,00000000 |
| <b>Rhod</b>     | 1,05794384 | 0,0000000 | 0,00000000 |
| <b>Gm6222</b>   | 1,05886322 | 0,0000664 | 0,00001356 |
| <b>Slc35f5</b>  | 1,06012651 | 0,0000000 | 0,00000000 |
| <b>Tpm4</b>     | 1,06332669 | 0,0000000 | 0,00000000 |
| <b>Lnpep</b>    | 1,06457401 | 0,0000000 | 0,00000000 |
| <b>Smim1011</b> | 1,06525809 | 0,0000000 | 0,00000000 |
| <b>Myd88</b>    | 1,0661068  | 0,0000000 | 0,00000000 |
| <b>Ppp1r18</b>  | 1,06632563 | 0,0000000 | 0,00000000 |
| <b>Pla2r1</b>   | 1,06636274 | 0,0000000 | 0,00000000 |
| <b>Lasp1</b>    | 1,06738818 | 0,0000000 | 0,00000000 |
| <b>Zfp703</b>   | 1,07032193 | 0,0000000 | 0,00000000 |
| <b>Dtna</b>     | 1,07043464 | 0,0000000 | 0,00000000 |
| <b>Lhfpl2</b>   | 1,071938   | 0,0000000 | 0,00000000 |
| <b>Cd9</b>      | 1,07207248 | 0,0000000 | 0,00000000 |
| <b>Htatip2</b>  | 1,07209617 | 0,0000000 | 0,00000000 |
| <b>Ddit4</b>    | 1,07216476 | 0,0000000 | 0,00000000 |
| <b>Plpp6</b>    | 1,0738764  | 0,0000000 | 0,00000000 |
| <b>Zfp874b</b>  | 1,07698263 | 0,0000003 | 0,00000004 |
| <b>Calhm5</b>   | 1,07733699 | 0,0000015 | 0,00000024 |
| <b>Creb3l1</b>  | 1,07768461 | 0,0003229 | 0,00007446 |
| <b>Acox3</b>    | 1,07796575 | 0,0000000 | 0,00000000 |
| <b>Zbtb4</b>    | 1,08080663 | 0,0000000 | 0,00000000 |
| <b>Acot2</b>    | 1,08184632 | 0,0000000 | 0,00000000 |
| <b>Chpf2</b>    | 1,08212951 | 0,0000000 | 0,00000000 |
| <b>Cryab</b>    | 1,08219054 | 0,0000000 | 0,00000000 |
| <b>Gent1</b>    | 1,08290865 | 0,0000000 | 0,00000000 |
| <b>Pgghg</b>    | 1,08340564 | 0,0000000 | 0,00000000 |
| <b>Sfxn5</b>    | 1,08371551 | 0,0000000 | 0,00000000 |
| <b>Gpr146</b>   | 1,08457316 | 0,0000000 | 0,00000000 |
| <b>Snhg8</b>    | 1,0868262  | 0,0000000 | 0,00000000 |
| <b>S100a1</b>   | 1,08704322 | 0,0000000 | 0,00000000 |

|                      |            |           |            |
|----------------------|------------|-----------|------------|
| <b>Ctsb</b>          | 1,08753713 | 0,0000000 | 0,00000000 |
| <b>Gstm5</b>         | 1,08777863 | 0,0000000 | 0,00000000 |
| <b>Rps6ka3</b>       | 1,08779084 | 0,0000000 | 0,00000000 |
| <b>Neil1</b>         | 1,08821057 | 0,0000155 | 0,00000286 |
| <b>Nsdhl</b>         | 1,08858752 | 0,0000000 | 0,00000000 |
| <b>Lpin1</b>         | 1,08890168 | 0,0001611 | 0,00003497 |
| <b>Tpp1</b>          | 1,08912418 | 0,0000000 | 0,00000000 |
| <b>Pigm</b>          | 1,09114101 | 0,0000000 | 0,00000000 |
| <b>Gm10080</b>       | 1,09170499 | 0,0000000 | 0,00000000 |
| <b>Lztfl1</b>        | 1,09178077 | 0,0000000 | 0,00000001 |
| <b>Psrc1</b>         | 1,09179473 | 0,0000000 | 0,00000000 |
| <b>Glb1l</b>         | 1,0938465  | 0,0013727 | 0,00035648 |
| <b>Slc25a24</b>      | 1,09573279 | 0,0000000 | 0,00000000 |
| <b>Snord104</b>      | 1,09614843 | 0,0000000 | 0,00000000 |
| <b>Bcas3</b>         | 1,09672051 | 0,0000000 | 0,00000000 |
| <b>1700086O06Rik</b> | 1,09772587 | 0,0000541 | 0,00001090 |
| <b>Gstt3</b>         | 1,09833824 | 0,0000442 | 0,00000876 |
| <b>Lats2</b>         | 1,10023316 | 0,0000000 | 0,00000000 |
| <b>Gpr153</b>        | 1,10081164 | 0,0000224 | 0,00000421 |
| <b>Skil</b>          | 1,10085851 | 0,0000000 | 0,00000000 |
| <b>Cpeb2</b>         | 1,10245893 | 0,0000000 | 0,00000000 |
| <b>Orai2</b>         | 1,10306516 | 0,0000000 | 0,00000000 |
| <b>Cd151</b>         | 1,10503091 | 0,0000000 | 0,00000000 |
| <b>Rtn4</b>          | 1,10509493 | 0,0000000 | 0,00000000 |
| <b>Rtn2</b>          | 1,10735865 | 0,0000023 | 0,00000037 |
| <b>Gpcpd1</b>        | 1,10853683 | 0,0000000 | 0,00000000 |
| <b>Rock2</b>         | 1,1091507  | 0,0000000 | 0,00000000 |
| <b>C430049B03Rik</b> | 1,11026451 | 0,0007398 | 0,00018310 |
| <b>Dnajib2</b>       | 1,11078071 | 0,0000000 | 0,00000000 |
| <b>Btbd19</b>        | 1,11270185 | 0,0000000 | 0,00000000 |
| <b>Plxna3</b>        | 1,11333169 | 0,0000488 | 0,00000975 |
| <b>Crip1</b>         | 1,11522434 | 0,0012066 | 0,00031026 |
| <b>Hint3</b>         | 1,11538636 | 0,0000248 | 0,00000471 |
| <b>Prorsd1</b>       | 1,11614128 | 0,0000000 | 0,00000000 |
| <b>Ttc30b</b>        | 1,11702588 | 0,0000360 | 0,00000703 |
| <b>Wdr5b</b>         | 1,11743441 | 0,0000515 | 0,00001034 |
| <b>Pmp22</b>         | 1,11768365 | 0,0000000 | 0,00000000 |
| <b>Pycr1</b>         | 1,11906522 | 0,0000025 | 0,00000042 |
| <b>Cd81</b>          | 1,11932684 | 0,0000000 | 0,00000000 |
| <b>Boc</b>           | 1,121744   | 0,0000000 | 0,00000000 |
| <b>Jadel</b>         | 1,12180441 | 0,0000000 | 0,00000000 |
| <b>Baspl</b>         | 1,12189754 | 0,0000000 | 0,00000000 |

|                      |            |           |            |
|----------------------|------------|-----------|------------|
| <b>Plec</b>          | 1,12229126 | 0,0000584 | 0,00001184 |
| <b>Tmem43</b>        | 1,12257478 | 0,0000000 | 0,00000000 |
| <b>Bphl</b>          | 1,12262711 | 0,0000000 | 0,00000000 |
| <b>Gm38317</b>       | 1,12274537 | 0,0004195 | 0,00009879 |
| <b>Pck2</b>          | 1,1233986  | 0,0000000 | 0,00000000 |
| <b>4930429F24Rik</b> | 1,12381597 | 0,0000103 | 0,00000185 |
| <b>Gnb4</b>          | 1,12535207 | 0,0000000 | 0,00000000 |
| <b>Arsg</b>          | 1,12582422 | 0,0000009 | 0,00000014 |
| <b>Rabac1</b>        | 1,12633379 | 0,0000000 | 0,00000000 |
| <b>Mdm2</b>          | 1,12772612 | 0,0000000 | 0,00000000 |
| <b>Ccndbp1</b>       | 1,12800638 | 0,0000000 | 0,00000000 |
| <b>Lrrc24</b>        | 1,12887975 | 0,0000000 | 0,00000000 |
| <b>1600014C10Rik</b> | 1,12998588 | 0,0000000 | 0,00000000 |
| <b>Gm19426</b>       | 1,13011243 | 0,0000513 | 0,00001029 |
| <b>Coa4</b>          | 1,13025153 | 0,0000104 | 0,00000188 |
| <b>Cyp26b1</b>       | 1,13044704 | 0,0000000 | 0,00000000 |
| <b>Rhobtb3</b>       | 1,13160179 | 0,0000000 | 0,00000000 |
| <b>Atp6v0a4</b>      | 1,13372675 | 0,0000038 | 0,00000065 |
| <b>Dnase1l1</b>      | 1,13445414 | 0,0001942 | 0,00004271 |
| <b>Ufsp1</b>         | 1,13592178 | 0,0000230 | 0,00000434 |
| <b>E430018J23Rik</b> | 1,13600302 | 0,0010400 | 0,00026398 |
| <b>Gpsm3</b>         | 1,13618376 | 0,0000000 | 0,00000000 |
| <b>Tnfrsf10b</b>     | 1,13712324 | 0,0000000 | 0,00000000 |
| <b>Sdr42e1</b>       | 1,13764225 | 0,0004515 | 0,00010710 |
| <b>Fam102a</b>       | 1,13838533 | 0,0000000 | 0,00000000 |
| <b>Ier5</b>          | 1,13983935 | 0,0000000 | 0,00000000 |
| <b>Gm4875</b>        | 1,14097287 | 0,0002947 | 0,00006741 |
| <b>Gask1b</b>        | 1,14439433 | 0,0000000 | 0,00000000 |
| <b>Arhgap26</b>      | 1,14619896 | 0,0000000 | 0,00000000 |
| <b>Lifr</b>          | 1,14654338 | 0,0000070 | 0,00000124 |
| <b>Itgb5</b>         | 1,14731328 | 0,0000000 | 0,00000000 |
| <b>Hexim1</b>        | 1,14888454 | 0,0000000 | 0,00000000 |
| <b>Usp27x</b>        | 1,14974318 | 0,0000012 | 0,00000019 |
| <b>Wbp1</b>          | 1,15315031 | 0,0000000 | 0,00000000 |
| <b>Trappc2</b>       | 1,15333379 | 0,0000051 | 0,00000089 |
| <b>Tram1l1</b>       | 1,15416093 | 0,0000008 | 0,00000013 |
| <b>Tnfaip3</b>       | 1,15449223 | 0,0010230 | 0,00025943 |
| <b>Zbtb26</b>        | 1,15555203 | 0,0000000 | 0,00000000 |
| <b>Tmem176a</b>      | 1,15696274 | 0,0000000 | 0,00000000 |
| <b>Rcn3</b>          | 1,15912838 | 0,0000209 | 0,00000393 |
| <b>Gm29083</b>       | 1,15991768 | 0,0018252 | 0,00048572 |
| <b>Ubald1</b>        | 1,16185937 | 0,0000000 | 0,00000000 |



|                      |            |           |            |
|----------------------|------------|-----------|------------|
| <b>Relb</b>          | 1,16235881 | 0,0000000 | 0,00000000 |
| <b>Plaat3</b>        | 1,16566255 | 0,0000000 | 0,00000000 |
| <b>Prokr1</b>        | 1,16624303 | 0,0000000 | 0,00000000 |
| <b>Zfp874a</b>       | 1,16657049 | 0,0000000 | 0,00000000 |
| <b>Gstm2</b>         | 1,16770141 | 0,0000000 | 0,00000000 |
| <b>Slc5a1</b>        | 1,1682268  | 0,0005946 | 0,00014438 |
| <b>Dubr</b>          | 1,16982677 | 0,0000000 | 0,00000000 |
| <b>E130317F20Rik</b> | 1,17008169 | 0,0000138 | 0,00000253 |
| <b>C1rl</b>          | 1,17382055 | 0,0000030 | 0,00000051 |
| <b>Atxn1</b>         | 1,17471135 | 0,0000000 | 0,00000000 |
| <b>Slc15a2</b>       | 1,17524899 | 0,0000000 | 0,00000000 |
| <b>Gpm6b</b>         | 1,17646433 | 0,0000620 | 0,00001263 |
| <b>Usp20</b>         | 1,17692282 | 0,0000000 | 0,00000000 |
| <b>Csf2ra</b>        | 1,1784671  | 0,0000261 | 0,00000499 |
| <b>Dpy19l3</b>       | 1,17910268 | 0,0000000 | 0,00000000 |
| <b>Gm6665</b>        | 1,18000835 | 0,0000000 | 0,00000000 |
| <b>Lpp</b>           | 1,18084114 | 0,0000000 | 0,00000000 |
| <b>Qpctl</b>         | 1,18111796 | 0,0000000 | 0,00000000 |
| <b>Rdh5</b>          | 1,18269855 | 0,0001371 | 0,00002940 |
| <b>Vim</b>           | 1,18420154 | 0,0000000 | 0,00000000 |
| <b>Loxl2</b>         | 1,18683843 | 0,0000074 | 0,00000131 |
| <b>Zfp57</b>         | 1,18935549 | 0,0000005 | 0,00000008 |
| <b>H2bc21</b>        | 1,18967118 | 0,0000000 | 0,00000000 |
| <b>Klf2</b>          | 1,19043808 | 0,0000580 | 0,00001174 |
| <b>Camk2d</b>        | 1,19067404 | 0,0000000 | 0,00000000 |
| <b>Vgl3</b>          | 1,19154621 | 0,0000000 | 0,00000000 |
| <b>Cpeb3</b>         | 1,19187274 | 0,0000000 | 0,00000000 |
| <b>Adamts13</b>      | 1,19320239 | 0,0003698 | 0,00008623 |
| <b>Mcts2</b>         | 1,19333791 | 0,0000000 | 0,00000000 |
| <b>Serf1</b>         | 1,19351897 | 0,0000000 | 0,00000000 |
| <b>Trim7</b>         | 1,19521632 | 0,0000456 | 0,00000905 |
| <b>Otub2</b>         | 1,19742576 | 0,0000000 | 0,00000000 |
| <b>R74862</b>        | 1,19862267 | 0,0000007 | 0,00000011 |
| <b>Ache</b>          | 1,20175939 | 0,0000040 | 0,00000067 |
| <b>Atf3</b>          | 1,20324056 | 0,0000000 | 0,00000000 |
| <b>2900041M22Rik</b> | 1,20549074 | 0,0002763 | 0,00006275 |
| <b>Pcdhb5</b>        | 1,20697815 | 0,0000072 | 0,00000127 |
| <b>Aldh1a3</b>       | 1,20760389 | 0,0000000 | 0,00000000 |
| <b>Pcdhb17</b>       | 1,20773071 | 0,0000090 | 0,00000161 |
| <b>Klhl29</b>        | 1,21031299 | 0,0000000 | 0,00000000 |
| <b>Khk</b>           | 1,21046553 | 0,0000000 | 0,00000000 |
| <b>Alpk1</b>         | 1,21117383 | 0,0000002 | 0,00000003 |

|                 |            |           |            |
|-----------------|------------|-----------|------------|
| <b>Inpp1</b>    | 1,21387036 | 0,0000000 | 0,00000000 |
| <b>Coq10b</b>   | 1,21608954 | 0,0000000 | 0,00000000 |
| <b>Wipf3</b>    | 1,21763812 | 0,0000000 | 0,00000000 |
| <b>Pik3ip1</b>  | 1,21997299 | 0,0000981 | 0,00002059 |
| <b>Klf9</b>     | 1,22059256 | 0,0000000 | 0,00000000 |
| <b>Csrnp1</b>   | 1,22099908 | 0,0000000 | 0,00000000 |
| <b>Fars2</b>    | 1,22155139 | 0,0000000 | 0,00000000 |
| <b>Rab39b</b>   | 1,22168976 | 0,0000526 | 0,00001058 |
| <b>Usp11</b>    | 1,22231824 | 0,0000000 | 0,00000000 |
| <b>Nat9</b>     | 1,22283912 | 0,0000000 | 0,00000000 |
| <b>Acbd4</b>    | 1,22299971 | 0,0000000 | 0,00000000 |
| <b>Itm2b</b>    | 1,22420427 | 0,0000000 | 0,00000000 |
| <b>Cpm</b>      | 1,22633735 | 0,0000000 | 0,00000000 |
| <b>Nfil3</b>    | 1,22763325 | 0,0000000 | 0,00000000 |
| <b>Pdrg1</b>    | 1,22835641 | 0,0000000 | 0,00000000 |
| <b>Hap1</b>     | 1,2285804  | 0,0000000 | 0,00000000 |
| <b>Inafm2</b>   | 1,2323184  | 0,0000000 | 0,00000000 |
| <b>Casq2</b>    | 1,23359095 | 0,0002738 | 0,00006217 |
| <b>Msrb1</b>    | 1,2340246  | 0,0000000 | 0,00000000 |
| <b>Rsu1</b>     | 1,23453843 | 0,0000000 | 0,00000000 |
| <b>Gstk1</b>    | 1,23485925 | 0,0002834 | 0,00006459 |
| <b>Erap1</b>    | 1,23501457 | 0,0000000 | 0,00000000 |
| <b>Exd1</b>     | 1,23569311 | 0,0012725 | 0,00032845 |
| <b>Plekhn1</b>  | 1,23643386 | 0,0018370 | 0,00048919 |
| <b>Flna</b>     | 1,23700614 | 0,0000000 | 0,00000000 |
| <b>Mob3a</b>    | 1,23827742 | 0,0000618 | 0,00001256 |
| <b>Crem</b>     | 1,23910759 | 0,0000000 | 0,00000000 |
| <b>Mrps6</b>    | 1,24107088 | 0,0000000 | 0,00000000 |
| <b>Sat2</b>     | 1,24135971 | 0,0000327 | 0,00000634 |
| <b>Smim14</b>   | 1,24146691 | 0,0000000 | 0,00000000 |
| <b>Ckb</b>      | 1,24153222 | 0,0000000 | 0,00000000 |
| <b>Marchf3</b>  | 1,24215008 | 0,0009136 | 0,00022935 |
| <b>Ahr</b>      | 1,24409915 | 0,0000000 | 0,00000000 |
| <b>Cyld</b>     | 1,24412638 | 0,0000000 | 0,00000000 |
| <b>Dhrs1</b>    | 1,24639561 | 0,0000000 | 0,00000000 |
| <b>Tmem198b</b> | 1,24720356 | 0,0000000 | 0,00000000 |
| <b>Asah2</b>    | 1,24756673 | 0,0000000 | 0,00000000 |
| <b>Lrp11</b>    | 1,2475999  | 0,0000000 | 0,00000000 |
| <b>Pigp</b>     | 1,24766926 | 0,0000000 | 0,00000000 |
| <b>Mertk</b>    | 1,24830768 | 0,0000046 | 0,00000078 |
| <b>Gm10825</b>  | 1,24928516 | 0,0000021 | 0,00000035 |
| <b>Soga3</b>    | 1,24936894 | 0,0002135 | 0,00004735 |

|                      |            |           |            |
|----------------------|------------|-----------|------------|
| <b>Trmt12</b>        | 1,25042685 | 0,0000000 | 0,00000000 |
| <b>Dock8</b>         | 1,25274455 | 0,0000000 | 0,00000000 |
| <b>Cyp2u1</b>        | 1,2527853  | 0,0000000 | 0,00000000 |
| <b>Cirbp</b>         | 1,25323395 | 0,0000000 | 0,00000000 |
| <b>Slc44a3</b>       | 1,25896043 | 0,0000038 | 0,00000064 |
| <b>Gxylt2</b>        | 1,26024503 | 0,0000000 | 0,00000000 |
| <b>Cldn12</b>        | 1,26084543 | 0,0000000 | 0,00000000 |
| <b>Aff1</b>          | 1,2622195  | 0,0000000 | 0,00000000 |
| <b>A730017L22Rik</b> | 1,26472449 | 0,0000002 | 0,00000003 |
| <b>Epm2aip1</b>      | 1,26485198 | 0,0000000 | 0,00000000 |
| <b>Bbs10</b>         | 1,26529338 | 0,0000002 | 0,00000003 |
| <b>Eva1c</b>         | 1,26560025 | 0,0000239 | 0,00000453 |
| <b>P3h2</b>          | 1,26606981 | 0,0000000 | 0,00000000 |
| <b>Slc10a3</b>       | 1,26633663 | 0,0000000 | 0,00000000 |
| <b>Etv5</b>          | 1,2666979  | 0,0000000 | 0,00000000 |
| <b>Pxmp4</b>         | 1,26682576 | 0,0000000 | 0,00000000 |
| <b>Acad10</b>        | 1,26725809 | 0,0000000 | 0,00000000 |
| <b>Sesn2</b>         | 1,26882939 | 0,0000766 | 0,00001584 |
| <b>2010320M18Rik</b> | 1,26896126 | 0,0000000 | 0,00000000 |
| <b>Pgam2</b>         | 1,26935369 | 0,0010325 | 0,00026194 |
| <b>Mcam</b>          | 1,27018887 | 0,0000000 | 0,00000000 |
| <b>Pthr1</b>         | 1,27071537 | 0,0000012 | 0,00000019 |
| <b>Shisa4</b>        | 1,27309814 | 0,0000000 | 0,00000000 |
| <b>Pcx</b>           | 1,27396053 | 0,0000000 | 0,00000000 |
| <b>Gm37352</b>       | 1,27430054 | 0,0000000 | 0,00000000 |
| <b>Anxa11</b>        | 1,27464085 | 0,0000000 | 0,00000000 |
| <b>Trim45</b>        | 1,27642804 | 0,0000073 | 0,00000129 |
| <b>Exoc3l4</b>       | 1,28102042 | 0,0000266 | 0,00000509 |
| <b>Tdrd7</b>         | 1,2821395  | 0,0000000 | 0,00000000 |
| <b>Tspan17</b>       | 1,28380394 | 0,0000000 | 0,00000000 |
| <b>Ebf4</b>          | 1,2846221  | 0,0007723 | 0,00019187 |
| <b>Pde5a</b>         | 1,28541889 | 0,0000000 | 0,00000000 |
| <b>Noct</b>          | 1,28694001 | 0,0000000 | 0,00000000 |
| <b>Idi1-ps1</b>      | 1,28746444 | 0,0000000 | 0,00000000 |
| <b>Kif6</b>          | 1,29213466 | 0,0000000 | 0,00000000 |
| <b>Zscan2</b>        | 1,29288847 | 0,0000000 | 0,00000000 |
| <b>Cdkl2</b>         | 1,29306477 | 0,0000000 | 0,00000000 |
| <b>Rims2</b>         | 1,29333593 | 0,0000000 | 0,00000000 |
| <b>Col11a1</b>       | 1,29612935 | 0,0016826 | 0,00044430 |
| <b>Acadvl</b>        | 1,29615982 | 0,0000000 | 0,00000000 |
| <b>Tm7sf2</b>        | 1,29618043 | 0,0000058 | 0,00000102 |
| <b>Avpil</b>         | 1,29778411 | 0,0000000 | 0,00000000 |

|                      |            |           |            |
|----------------------|------------|-----------|------------|
| <b>Aamdc</b>         | 1,29913364 | 0,0000000 | 0,00000000 |
| <b>Bcar1</b>         | 1,29924591 | 0,0000000 | 0,00000000 |
| <b>Gm572</b>         | 1,2994321  | 0,0008765 | 0,00021945 |
| <b>Ly6g5c</b>        | 1,30294933 | 0,0004184 | 0,00009851 |
| <b>Pttg1</b>         | 1,30327608 | 0,0000000 | 0,00000000 |
| <b>Ehd4</b>          | 1,30603795 | 0,0000000 | 0,00000000 |
| <b>0610038B21Rik</b> | 1,30684865 | 0,0000093 | 0,00000166 |
| <b>Slc9a9</b>        | 1,30852909 | 0,0000000 | 0,00000000 |
| <b>Lancl1</b>        | 1,30914501 | 0,0000000 | 0,00000000 |
| <b>Carmn</b>         | 1,31061479 | 0,0016978 | 0,00044864 |
| <b>Nuak1</b>         | 1,31116836 | 0,0000000 | 0,00000000 |
| <b>Alcam</b>         | 1,31304602 | 0,0000000 | 0,00000000 |
| <b>Sh3tc1</b>        | 1,31306519 | 0,0009801 | 0,00024746 |
| <b>Il13ra1</b>       | 1,31405215 | 0,0000000 | 0,00000000 |
| <b>Blcap</b>         | 1,31499784 | 0,0000000 | 0,00000000 |
| <b>Kend1</b>         | 1,31523696 | 0,0000112 | 0,00000203 |
| <b>Unc93b1</b>       | 1,31533458 | 0,0000000 | 0,00000000 |
| <b>Mmd</b>           | 1,31616757 | 0,0000000 | 0,00000000 |
| <b>Ctsl</b>          | 1,31657628 | 0,0000000 | 0,00000000 |
| <b>Dynlt1b</b>       | 1,31774326 | 0,0000029 | 0,00000048 |
| <b>Pcdha11</b>       | 1,31779015 | 0,0009412 | 0,00023695 |
| <b>Hspa4l</b>        | 1,317884   | 0,0000000 | 0,00000000 |
| <b>Taf9b</b>         | 1,31852936 | 0,0000000 | 0,00000000 |
| <b>Zcwpw1</b>        | 1,31858366 | 0,0000719 | 0,00001479 |
| <b>Tafa5</b>         | 1,31862679 | 0,0000222 | 0,00000418 |
| <b>Map7</b>          | 1,32017794 | 0,0002429 | 0,00005442 |
| <b>Hbegf</b>         | 1,3225787  | 0,0000001 | 0,00000001 |
| <b>Ubash3b</b>       | 1,32328209 | 0,0000000 | 0,00000000 |
| <b>Ehd2</b>          | 1,32334609 | 0,0002658 | 0,00006014 |
| <b>Tnrc18</b>        | 1,32347996 | 0,0000000 | 0,00000000 |
| <b>Yjfn3</b>         | 1,32546638 | 0,0000001 | 0,00000001 |
| <b>Id3</b>           | 1,32670964 | 0,0000000 | 0,00000000 |
| <b>Gm10863</b>       | 1,32896108 | 0,0000000 | 0,00000000 |
| <b>5930430L01Rik</b> | 1,32996699 | 0,0005360 | 0,00012895 |
| <b>Spaar</b>         | 1,3301941  | 0,0003674 | 0,00008556 |
| <b>Acad11</b>        | 1,33085667 | 0,0000000 | 0,00000000 |
| <b>Pld3</b>          | 1,33135891 | 0,0000000 | 0,00000000 |
| <b>Hspa2</b>         | 1,33174934 | 0,0000000 | 0,00000000 |
| <b>Crebl2</b>        | 1,33297753 | 0,0000000 | 0,00000000 |
| <b>1600012H06Rik</b> | 1,33300704 | 0,0000000 | 0,00000000 |
| <b>F3</b>            | 1,33316217 | 0,0000000 | 0,00000000 |
| <b>Nudt18</b>        | 1,33366761 | 0,0000000 | 0,00000000 |

|                      |            |           |            |
|----------------------|------------|-----------|------------|
| <b>1110032A03Rik</b> | 1,33438124 | 0,0000000 | 0,00000000 |
| <b>Crebrf</b>        | 1,33590116 | 0,0000000 | 0,00000000 |
| <b>Acyp1</b>         | 1,33678948 | 0,0000000 | 0,00000000 |
| <b>Dusp6</b>         | 1,33821057 | 0,0000000 | 0,00000000 |
| <b>1810024B03Rik</b> | 1,33852789 | 0,0000099 | 0,00000178 |
| <b>Dlg4</b>          | 1,33870583 | 0,0000000 | 0,00000000 |
| <b>Spry4</b>         | 1,34294174 | 0,0000000 | 0,00000000 |
| <b>Tmem80</b>        | 1,34428747 | 0,0000000 | 0,00000000 |
| <b>Ntng2</b>         | 1,3443916  | 0,0017187 | 0,00045475 |
| <b>Pakap</b>         | 1,34916681 | 0,0000299 | 0,00000576 |
| <b>Tmtc2</b>         | 1,34960638 | 0,0000031 | 0,00000051 |
| <b>Cyb5r3</b>        | 1,35034637 | 0,0000000 | 0,00000000 |
| <b>Gm9791</b>        | 1,35046231 | 0,0000038 | 0,00000064 |
| <b>Wrn</b>           | 1,35077483 | 0,0000000 | 0,00000000 |
| <b>Rrm2b</b>         | 1,35393015 | 0,0000000 | 0,00000000 |
| <b>Ypel4</b>         | 1,3554107  | 0,0000004 | 0,00000006 |
| <b>Duox1</b>         | 1,35634509 | 0,0000018 | 0,00000030 |
| <b>Cyb5d2</b>        | 1,35764632 | 0,0000000 | 0,00000000 |
| <b>Daam2</b>         | 1,35778873 | 0,0000000 | 0,00000000 |
| <b>Ppp1r14c</b>      | 1,35843235 | 0,0000022 | 0,00000035 |
| <b>Tmem230</b>       | 1,3587987  | 0,0000000 | 0,00000000 |
| <b>Myrfl</b>         | 1,36240769 | 0,0002138 | 0,00004743 |
| <b>Anxa7</b>         | 1,3626737  | 0,0000000 | 0,00000000 |
| <b>Fam234a</b>       | 1,36307605 | 0,0000000 | 0,00000000 |
| <b>4930556M19Rik</b> | 1,36506769 | 0,0001174 | 0,00002495 |
| <b>Gdi1</b>          | 1,36715015 | 0,0000000 | 0,00000000 |
| <b>Rnh1</b>          | 1,36870694 | 0,0000000 | 0,00000000 |
| <b>Thnsl2</b>        | 1,36912253 | 0,0000005 | 0,00000008 |
| <b>Kctd12</b>        | 1,3708295  | 0,0000000 | 0,00000000 |
| <b>Mageh1</b>        | 1,37085239 | 0,0000006 | 0,00000009 |
| <b>Ptp4a3</b>        | 1,37125095 | 0,0000000 | 0,00000000 |
| <b>Gsta1</b>         | 1,37250769 | 0,0000000 | 0,00000000 |
| <b>Akr1b8</b>        | 1,37275654 | 0,0000000 | 0,00000000 |
| <b>Zfp365</b>        | 1,37302956 | 0,0000754 | 0,00001555 |
| <b>Zyx</b>           | 1,37450647 | 0,0000000 | 0,00000000 |
| <b>Pomc</b>          | 1,37505744 | 0,0014598 | 0,00038098 |
| <b>5730471H19Rik</b> | 1,37516701 | 0,0000001 | 0,00000001 |
| <b>Fam160a1</b>      | 1,37807469 | 0,0000107 | 0,00000192 |
| <b>Asic3</b>         | 1,37855986 | 0,0003031 | 0,00006947 |
| <b>Gm38391</b>       | 1,3789155  | 0,0000067 | 0,00000118 |
| <b>Gm9522</b>        | 1,38044279 | 0,0006941 | 0,00017055 |
| <b>Myl6</b>          | 1,38134086 | 0,0000000 | 0,00000000 |

|                      |            |           |            |
|----------------------|------------|-----------|------------|
| <b>Cavin1</b>        | 1,38227991 | 0,0000000 | 0,00000000 |
| <b>Cx3cl1</b>        | 1,38346349 | 0,0000000 | 0,00000000 |
| <b>Gm18609</b>       | 1,38671595 | 0,0000636 | 0,00001297 |
| <b>Dstn</b>          | 1,3875504  | 0,0000000 | 0,00000000 |
| <b>Bbc3</b>          | 1,387654   | 0,0000000 | 0,00000000 |
| <b>Cited2</b>        | 1,38801386 | 0,0000000 | 0,00000000 |
| <b>Bloc1s6</b>       | 1,38997691 | 0,0000000 | 0,00000000 |
| <b>L1cam</b>         | 1,39198369 | 0,0000000 | 0,00000000 |
| <b>Nmi</b>           | 1,39287214 | 0,0000000 | 0,00000000 |
| <b>Srxn1</b>         | 1,39341551 | 0,0000000 | 0,00000000 |
| <b>Trib3</b>         | 1,3935769  | 0,0000000 | 0,00000000 |
| <b>Klhdc7a</b>       | 1,39475526 | 0,0003145 | 0,00007230 |
| <b>1700052K11Rik</b> | 1,394844   | 0,0000502 | 0,00001007 |
| <b>Capn1</b>         | 1,39522868 | 0,0000000 | 0,00000000 |
| <b>Fbxl20</b>        | 1,39548905 | 0,0000000 | 0,00000000 |
| <b>Arid5a</b>        | 1,39581871 | 0,0000000 | 0,00000000 |
| <b>Fzd5</b>          | 1,39604642 | 0,0000000 | 0,00000000 |
| <b>Morrbid</b>       | 1,39754317 | 0,0000000 | 0,00000000 |
| <b>Pdzd7</b>         | 1,39831672 | 0,0000000 | 0,00000000 |
| <b>H1f0</b>          | 1,39979796 | 0,0000000 | 0,00000000 |
| <b>Arl11</b>         | 1,40133659 | 0,0000000 | 0,00000000 |
| <b>Carhsp1</b>       | 1,40189705 | 0,0000000 | 0,00000000 |
| <b>Cspg4</b>         | 1,40215584 | 0,0000000 | 0,00000000 |
| <b>Fam71f1</b>       | 1,40257043 | 0,0000000 | 0,00000000 |
| <b>Adar</b>          | 1,40343106 | 0,0000000 | 0,00000000 |
| <b>Snap47</b>        | 1,40620119 | 0,0000000 | 0,00000000 |
| <b>Slc25a1</b>       | 1,40705003 | 0,0000000 | 0,00000000 |
| <b>Sfn</b>           | 1,4075629  | 0,0000000 | 0,00000000 |
| <b>Nox4</b>          | 1,40940856 | 0,0000000 | 0,00000000 |
| <b>Gm45495</b>       | 1,41003041 | 0,0008277 | 0,00020653 |
| <b>Larp1b</b>        | 1,41144621 | 0,0000000 | 0,00000000 |
| <b>Pak6</b>          | 1,41313708 | 0,0000408 | 0,00000803 |
| <b>Cdc42ep1</b>      | 1,41501625 | 0,0000000 | 0,00000000 |
| <b>Itgb3</b>         | 1,4166197  | 0,0000000 | 0,00000000 |
| <b>Tmem203</b>       | 1,41734392 | 0,0006975 | 0,00017149 |
| <b>Rnasel</b>        | 1,41781535 | 0,0000000 | 0,00000000 |
| <b>1500015A07Rik</b> | 1,41886044 | 0,0000039 | 0,00000066 |
| <b>Cyb561</b>        | 1,42032075 | 0,0003170 | 0,00007294 |
| <b>Zfp467</b>        | 1,4251473  | 0,0000000 | 0,00000000 |
| <b>Eif2ak2</b>       | 1,42678687 | 0,0000000 | 0,00000000 |
| <b>Pyurf</b>         | 1,42773813 | 0,0000000 | 0,00000000 |
| <b>Tmem14a</b>       | 1,42910566 | 0,0000000 | 0,00000000 |

|                      |            |           |            |
|----------------------|------------|-----------|------------|
| <b>Jak3</b>          | 1,42910575 | 0,0000042 | 0,00000071 |
| <b>Shb</b>           | 1,4310155  | 0,0000000 | 0,00000000 |
| <b>Eno2</b>          | 1,43335289 | 0,0000000 | 0,00000000 |
| <b>Gm28809</b>       | 1,43446414 | 0,0000001 | 0,00000002 |
| <b>Pkia</b>          | 1,43515654 | 0,0000000 | 0,00000000 |
| <b>Tnfaip2</b>       | 1,4354219  | 0,0000000 | 0,00000000 |
| <b>Cyp4f17</b>       | 1,43685109 | 0,0000031 | 0,00000052 |
| <b>Hacl1</b>         | 1,43689077 | 0,0000000 | 0,00000000 |
| <b>Zc2hc1a</b>       | 1,43786408 | 0,0000000 | 0,00000000 |
| <b>Aldoc</b>         | 1,43786855 | 0,0000000 | 0,00000000 |
| <b>Macrodl1</b>      | 1,4381545  | 0,0000000 | 0,00000000 |
| <b>Large1</b>        | 1,43847709 | 0,0000000 | 0,00000000 |
| <b>Cyb561a3</b>      | 1,4391793  | 0,0000000 | 0,00000001 |
| <b>Zbed5</b>         | 1,44005474 | 0,0001595 | 0,00003456 |
| <b>Lrrc51</b>        | 1,4410366  | 0,0000000 | 0,00000000 |
| <b>Dlx6os1</b>       | 1,44197051 | 0,0000001 | 0,00000001 |
| <b>Tmem35b</b>       | 1,44319599 | 0,0000239 | 0,00000453 |
| <b>Nabp1</b>         | 1,44324327 | 0,0000000 | 0,00000000 |
| <b>4921531C22Rik</b> | 1,44417573 | 0,0000020 | 0,00000033 |
| <b>Prob1</b>         | 1,44515656 | 0,0001735 | 0,00003785 |
| <b>Gabra1</b>        | 1,4520923  | 0,0007734 | 0,00019222 |
| <b>Gm13067</b>       | 1,4559745  | 0,0003779 | 0,00008828 |
| <b>G6pdx</b>         | 1,456296   | 0,0000000 | 0,00000000 |
| <b>Rb1</b>           | 1,4565192  | 0,0000000 | 0,00000000 |
| <b>Mylk</b>          | 1,45802208 | 0,0000000 | 0,00000000 |
| <b>Gstm4</b>         | 1,46223668 | 0,0000000 | 0,00000000 |
| <b>Gm42778</b>       | 1,46300888 | 0,0007267 | 0,00017965 |
| <b>2610306M01Rik</b> | 1,46362201 | 0,0000000 | 0,00000000 |
| <b>Kyat1</b>         | 1,46438903 | 0,0000000 | 0,00000000 |
| <b>Cavin2</b>        | 1,46494955 | 0,0000000 | 0,00000000 |
| <b>Akr1b3</b>        | 1,4653992  | 0,0000000 | 0,00000000 |
| <b>Ctnnal1</b>       | 1,4683331  | 0,0000000 | 0,00000000 |
| <b>2810013P06Rik</b> | 1,46917065 | 0,0000000 | 0,00000000 |
| <b>Tmem220</b>       | 1,47063237 | 0,0000452 | 0,00000898 |
| <b>Dok5</b>          | 1,47082744 | 0,0000000 | 0,00000000 |
| <b>Shc3</b>          | 1,47129936 | 0,0000000 | 0,00000000 |
| <b>Ccdc63</b>        | 1,47130547 | 0,0011284 | 0,00028825 |
| <b>Kif9</b>          | 1,47336388 | 0,0001518 | 0,00003280 |
| <b>Pdlim5</b>        | 1,47403778 | 0,0000000 | 0,00000000 |
| <b>Akr1b10</b>       | 1,4740399  | 0,0000000 | 0,00000000 |
| <b>Ehd3</b>          | 1,47518193 | 0,0000000 | 0,00000000 |
| <b>Gm42829</b>       | 1,47529679 | 0,0002480 | 0,00005571 |

|                      |            |           |            |
|----------------------|------------|-----------|------------|
| <b>Dgka</b>          | 1,47893233 | 0,0000000 | 0,00000000 |
| <b>Slc30a4</b>       | 1,47943816 | 0,0000000 | 0,00000000 |
| <b>Gm7967</b>        | 1,48292842 | 0,0004732 | 0,00011267 |
| <b>Dner</b>          | 1,48326022 | 0,0007164 | 0,00017686 |
| <b>4930455G09Rik</b> | 1,4832964  | 0,0000107 | 0,00000193 |
| <b>B230206L02Rik</b> | 1,4834033  | 0,0000000 | 0,00000000 |
| <b>Draxin</b>        | 1,48436024 | 0,0001950 | 0,00004289 |
| <b>Adamts1</b>       | 1,48582782 | 0,0000000 | 0,00000000 |
| <b>Cmb1</b>          | 1,48654943 | 0,0000000 | 0,00000000 |
| <b>Dyrk1b</b>        | 1,49254689 | 0,0000000 | 0,00000000 |
| <b>1700007L15Rik</b> | 1,49256464 | 0,0000465 | 0,00000926 |
| <b>Fuz</b>           | 1,49670156 | 0,0000000 | 0,00000000 |
| <b>Polr2l</b>        | 1,49723167 | 0,0000000 | 0,00000000 |
| <b>Nacad</b>         | 1,4974076  | 0,0000002 | 0,00000003 |
| <b>Tnfrsf14</b>      | 1,49891713 | 0,0008236 | 0,00020544 |
| <b>Lrrc27</b>        | 1,4994076  | 0,0000000 | 0,00000000 |
| <b>Gm6736</b>        | 1,49997153 | 0,0000000 | 0,00000000 |
| <b>Klhdc1</b>        | 1,50209177 | 0,0000046 | 0,00000078 |
| <b>Malat1</b>        | 1,50330046 | 0,0000000 | 0,00000000 |
| <b>Csdc2</b>         | 1,503467   | 0,0000652 | 0,00001331 |
| <b>B230216N24Rik</b> | 1,50477659 | 0,0005116 | 0,00012258 |
| <b>Gm37696</b>       | 1,50592801 | 0,0000283 | 0,00000544 |
| <b>Arl4a</b>         | 1,5069684  | 0,0000000 | 0,00000000 |
| <b>Rnf128</b>        | 1,50865799 | 0,0000000 | 0,00000000 |
| <b>BC024978</b>      | 1,5097364  | 0,0000000 | 0,00000000 |
| <b>Il18</b>          | 1,51159249 | 0,0004314 | 0,00010181 |
| <b>Hdac9</b>         | 1,51165727 | 0,0000238 | 0,00000451 |
| <b>Gfap</b>          | 1,51299034 | 0,0000015 | 0,00000025 |
| <b>Spry2</b>         | 1,51426344 | 0,0000000 | 0,00000000 |
| <b>Pbxip1</b>        | 1,51484493 | 0,0000000 | 0,00000000 |
| <b>Slc46a1</b>       | 1,51701525 | 0,0000000 | 0,00000000 |
| <b>Veph1</b>         | 1,51899545 | 0,0001067 | 0,00002249 |
| <b>Bach2</b>         | 1,51909674 | 0,0000000 | 0,00000000 |
| <b>Gm37305</b>       | 1,52009733 | 0,0000000 | 0,00000000 |
| <b>Rhd</b>           | 1,52056485 | 0,0000000 | 0,00000000 |
| <b>Gm5454</b>        | 1,52058927 | 0,0000000 | 0,00000000 |
| <b>Mylpf</b>         | 1,5207133  | 0,0000002 | 0,00000003 |
| <b>Arhgef9</b>       | 1,52113875 | 0,0000001 | 0,00000001 |
| <b>Fbxo32</b>        | 1,52148749 | 0,0000000 | 0,00000000 |
| <b>Pla2g2e</b>       | 1,52286946 | 0,0000000 | 0,00000000 |
| <b>Itpr3</b>         | 1,52381701 | 0,0000000 | 0,00000000 |
| <b>Ptms</b>          | 1,52600976 | 0,0000000 | 0,00000000 |



|                      |            |           |            |
|----------------------|------------|-----------|------------|
| <b>C1ra</b>          | 1,5289543  | 0,0000000 | 0,0000000  |
| <b>Gstol</b>         | 1,52973323 | 0,0000000 | 0,0000000  |
| <b>Gm5456</b>        | 1,53018706 | 0,0000430 | 0,00000851 |
| <b>Eps811</b>        | 1,53138275 | 0,0000000 | 0,0000000  |
| <b>Nudt7</b>         | 1,53418817 | 0,0000000 | 0,0000000  |
| <b>Nrep</b>          | 1,53465168 | 0,0000000 | 0,0000000  |
| <b>Etv1</b>          | 1,53473564 | 0,0000000 | 0,0000000  |
| <b>Mr1</b>           | 1,53513072 | 0,0000000 | 0,0000000  |
| <b>Slc1a4</b>        | 1,53614067 | 0,0000000 | 0,0000000  |
| <b>Sema6d</b>        | 1,53705565 | 0,0000000 | 0,0000000  |
| <b>Olfml3</b>        | 1,5378737  | 0,0000000 | 0,0000000  |
| <b>9330102E08Rik</b> | 1,54148977 | 0,0000000 | 0,0000000  |
| <b>Gm38158</b>       | 1,54457839 | 0,0000000 | 0,0000000  |
| <b>Dcdc2a</b>        | 1,54889552 | 0,0001694 | 0,00003691 |
| <b>Gsn</b>           | 1,55107493 | 0,0000000 | 0,0000000  |
| <b>Tcta</b>          | 1,55151922 | 0,0000000 | 0,0000000  |
| <b>Tmem86a</b>       | 1,55373029 | 0,0000000 | 0,0000000  |
| <b>Prdx5</b>         | 1,55561259 | 0,0000000 | 0,0000000  |
| <b>Colgalt2</b>      | 1,55715358 | 0,0001600 | 0,00003469 |
| <b>Slc39a13</b>      | 1,55755465 | 0,0000000 | 0,0000000  |
| <b>Nipal4</b>        | 1,55797107 | 0,0000000 | 0,0000000  |
| <b>Ptprd</b>         | 1,56174733 | 0,0005124 | 0,00012281 |
| <b>Tlcd3b</b>        | 1,56177206 | 0,0016793 | 0,00044334 |
| <b>4930402H24Rik</b> | 1,56246207 | 0,0000000 | 0,0000000  |
| <b>H2-T22</b>        | 1,56256573 | 0,0000000 | 0,0000000  |
| <b>Maged2</b>        | 1,56388893 | 0,0000000 | 0,0000000  |
| <b>Lncenc1</b>       | 1,56495595 | 0,0000038 | 0,00000064 |
| <b>Pam</b>           | 1,5654993  | 0,0000000 | 0,0000000  |
| <b>2010001A14Rik</b> | 1,56560657 | 0,0002144 | 0,00004758 |
| <b>Naip2</b>         | 1,5661432  | 0,0000000 | 0,0000000  |
| <b>Sync</b>          | 1,56649311 | 0,0010849 | 0,00027616 |
| <b>Gja1</b>          | 1,56772175 | 0,0000000 | 0,0000000  |
| <b>B230217C12Rik</b> | 1,57004894 | 0,0000000 | 0,0000000  |
| <b>Gm2115</b>        | 1,57238397 | 0,0001837 | 0,00004023 |
| <b>Olfm1</b>         | 1,57266769 | 0,0000000 | 0,0000000  |
| <b>C330011M18Rik</b> | 1,57506244 | 0,0009058 | 0,00022718 |
| <b>Exoc3l</b>        | 1,57689814 | 0,0000462 | 0,00000919 |
| <b>Lama5</b>         | 1,57806185 | 0,0000000 | 0,0000000  |
| <b>Zfp697</b>        | 1,58149087 | 0,0000000 | 0,0000000  |
| <b>Asap3</b>         | 1,58161356 | 0,0010524 | 0,00026739 |
| <b>Fhl3</b>          | 1,5835488  | 0,0000000 | 0,0000000  |
| <b>Mgat3</b>         | 1,58454359 | 0,0017717 | 0,00047022 |

|                |            |           |            |
|----------------|------------|-----------|------------|
| <b>Dhh</b>     | 1,58538942 | 0,0003770 | 0,00008802 |
| <b>Kcnu1</b>   | 1,58637001 | 0,0000793 | 0,00001643 |
| <b>Pls3</b>    | 1,58683768 | 0,0000000 | 0,00000000 |
| <b>Klf7</b>    | 1,58684018 | 0,0000000 | 0,00000000 |
| <b>Drc3</b>    | 1,5903551  | 0,0000019 | 0,00000030 |
| <b>Scube3</b>  | 1,5908861  | 0,0000000 | 0,00000000 |
| <b>S100a10</b> | 1,59581152 | 0,0000000 | 0,00000000 |
| <b>Adcy5</b>   | 1,5964771  | 0,0000318 | 0,00000614 |
| <b>Gm4285</b>  | 1,59688224 | 0,0000592 | 0,00001200 |
| <b>Eme2</b>    | 1,59693481 | 0,0000000 | 0,00000000 |
| <b>Cyp4f13</b> | 1,59793008 | 0,0000000 | 0,00000000 |
| <b>Gm17435</b> | 1,60226433 | 0,0000005 | 0,00000007 |
| <b>Cercam</b>  | 1,6037173  | 0,0000004 | 0,00000006 |
| <b>Phyh</b>    | 1,60409593 | 0,0000000 | 0,00000000 |
| <b>Tent5a</b>  | 1,6050494  | 0,0000000 | 0,00000000 |
| <b>Epb41l1</b> | 1,6059993  | 0,0000000 | 0,00000000 |
| <b>Rbm11</b>   | 1,60676309 | 0,0008458 | 0,00021148 |
| <b>Gm19569</b> | 1,60731085 | 0,0001894 | 0,00004160 |
| <b>Otos</b>    | 1,60821988 | 0,0000072 | 0,00000127 |
| <b>F8</b>      | 1,60885765 | 0,0000000 | 0,00000000 |
| <b>Rnd3</b>    | 1,60902584 | 0,0000000 | 0,00000000 |
| <b>Col7a1</b>  | 1,60924785 | 0,0000000 | 0,00000000 |
| <b>Traf5</b>   | 1,60946271 | 0,0006471 | 0,00015788 |
| <b>Runx2</b>   | 1,60966022 | 0,0000000 | 0,00000000 |
| <b>Mllt11</b>  | 1,61273235 | 0,0000000 | 0,00000000 |
| <b>Rep15</b>   | 1,6145789  | 0,0000029 | 0,00000048 |
| <b>Tmem190</b> | 1,61479133 | 0,0005064 | 0,00012122 |
| <b>Sphk1</b>   | 1,61489163 | 0,0000000 | 0,00000000 |
| <b>Slc17a7</b> | 1,61502544 | 0,0000562 | 0,00001135 |
| <b>Procr</b>   | 1,61510122 | 0,0000000 | 0,00000000 |
| <b>Was</b>     | 1,61534616 | 0,0002816 | 0,00006408 |
| <b>Tgfb1</b>   | 1,61603368 | 0,0000000 | 0,00000000 |
| <b>Scrn1</b>   | 1,61966241 | 0,0000000 | 0,00000000 |
| <b>Prrg2</b>   | 1,62114571 | 0,0000000 | 0,00000000 |
| <b>Il4ra</b>   | 1,62148586 | 0,0000529 | 0,00001065 |
| <b>Slc2a13</b> | 1,62446179 | 0,0000694 | 0,00001424 |
| <b>Slc43a2</b> | 1,63319219 | 0,0000000 | 0,00000000 |
| <b>Nat8f1</b>  | 1,6339804  | 0,0000137 | 0,00000251 |
| <b>H2-Eb1</b>  | 1,63418453 | 0,0017306 | 0,00045805 |
| <b>Chrm1</b>   | 1,63456749 | 0,0013816 | 0,00035905 |
| <b>Psd3</b>    | 1,63740347 | 0,0000001 | 0,00000001 |
| <b>Etfrf1</b>  | 1,63808298 | 0,0000000 | 0,00000000 |

|                      |            |           |            |
|----------------------|------------|-----------|------------|
| <b>Il1rap</b>        | 1,63860141 | 0,0000000 | 0,00000000 |
| <b>Elov17</b>        | 1,642172   | 0,0000000 | 0,00000000 |
| <b>Nnmt</b>          | 1,64374643 | 0,0000000 | 0,00000000 |
| <b>Eva1a</b>         | 1,64641174 | 0,0000000 | 0,00000000 |
| <b>Abhd4</b>         | 1,64834561 | 0,0000000 | 0,00000000 |
| <b>Hdac7</b>         | 1,65087622 | 0,0000000 | 0,00000000 |
| <b>9330104G04Rik</b> | 1,65207711 | 0,0000016 | 0,00000026 |
| <b>Ahrr</b>          | 1,65231131 | 0,0000000 | 0,00000000 |
| <b>Ypel2</b>         | 1,65256007 | 0,0000000 | 0,00000000 |
| <b>Ccng1</b>         | 1,65260266 | 0,0000000 | 0,00000000 |
| <b>Hkdc1</b>         | 1,65505735 | 0,0002449 | 0,00005490 |
| <b>Foxr2</b>         | 1,65578968 | 0,0000000 | 0,00000000 |
| <b>Dop1b</b>         | 1,65653544 | 0,0000000 | 0,00000000 |
| <b>Gadd45b</b>       | 1,65656423 | 0,0000000 | 0,00000000 |
| <b>Irs2</b>          | 1,65832447 | 0,0000000 | 0,00000000 |
| <b>Tcn2</b>          | 1,65891315 | 0,0000000 | 0,00000000 |
| <b>C030014I23Rik</b> | 1,6614541  | 0,0000043 | 0,00000073 |
| <b>Rasl1a</b>        | 1,66319844 | 0,0000000 | 0,00000000 |
| <b>Mgst1</b>         | 1,66502574 | 0,0000000 | 0,00000000 |
| <b>Kenn4</b>         | 1,66551036 | 0,0003693 | 0,00008608 |
| <b>Bcl2l1</b>        | 1,66706534 | 0,0000000 | 0,00000000 |
| <b>Adcy1</b>         | 1,66782497 | 0,0016872 | 0,00044559 |
| <b>Fbxo6</b>         | 1,66856857 | 0,0000000 | 0,00000000 |
| <b>Ampd3</b>         | 1,66881518 | 0,0000000 | 0,00000000 |
| <b>Aldh3b1</b>       | 1,66918052 | 0,0000000 | 0,00000000 |
| <b>Gm20125</b>       | 1,67158568 | 0,0016741 | 0,00044190 |
| <b>Nebl</b>          | 1,67196876 | 0,0000000 | 0,00000000 |
| <b>Myl6b</b>         | 1,67328703 | 0,0000000 | 0,00000000 |
| <b>Myliip</b>        | 1,67437848 | 0,0000000 | 0,00000000 |
| <b>1700096K18Rik</b> | 1,67743156 | 0,0002480 | 0,00005569 |
| <b>Hmox1</b>         | 1,67922639 | 0,0000000 | 0,00000000 |
| <b>Fam214a</b>       | 1,68061285 | 0,0000000 | 0,00000000 |
| <b>Map1lc3a</b>      | 1,68131841 | 0,0000000 | 0,00000000 |
| <b>Rgs2</b>          | 1,68154569 | 0,0000000 | 0,00000000 |
| <b>Epha7</b>         | 1,68374879 | 0,0000000 | 0,00000000 |
| <b>H2-DMa</b>        | 1,68389668 | 0,0002945 | 0,00006734 |
| <b>Kazald1</b>       | 1,6844781  | 0,0005889 | 0,00014282 |
| <b>1110025M09Rik</b> | 1,68604108 | 0,0002475 | 0,00005555 |
| <b>Alyref2</b>       | 1,69036912 | 0,0002048 | 0,00004524 |
| <b>Eef1a2</b>        | 1,69266862 | 0,0001490 | 0,00003214 |
| <b>Gm16124</b>       | 1,69667766 | 0,0001204 | 0,00002561 |
| <b>Ssc5d</b>         | 1,69711477 | 0,0000000 | 0,00000000 |

|                      |            |           |            |
|----------------------|------------|-----------|------------|
| <b>Fgfr1</b>         | 1,70001107 | 0,0000000 | 0,00000000 |
| <b>3930402G23Rik</b> | 1,70110365 | 0,0000090 | 0,00000160 |
| <b>Arap3</b>         | 1,7018172  | 0,0000000 | 0,00000000 |
| <b>Cebpb</b>         | 1,70235908 | 0,0000000 | 0,00000000 |
| <b>Ifi2712a</b>      | 1,70367892 | 0,0013697 | 0,00035536 |
| <b>Esd</b>           | 1,70794999 | 0,0000000 | 0,00000000 |
| <b>Parp11</b>        | 1,70834871 | 0,0000000 | 0,00000000 |
| <b>Cartpt</b>        | 1,70863394 | 0,0014432 | 0,00037625 |
| <b>Cd59a</b>         | 1,70974142 | 0,0000000 | 0,00000000 |
| <b>Platr22</b>       | 1,70976361 | 0,0016989 | 0,00044902 |
| <b>Mme</b>           | 1,7106419  | 0,0000000 | 0,00000000 |
| <b>Abcg2</b>         | 1,71148117 | 0,0000000 | 0,00000000 |
| <b>Fam71e1</b>       | 1,71223957 | 0,0000352 | 0,00000686 |
| <b>Lyz2</b>          | 1,7184312  | 0,0016158 | 0,00042544 |
| <b>Junb</b>          | 1,72111065 | 0,0000000 | 0,00000000 |
| <b>Flot1</b>         | 1,72248586 | 0,0000000 | 0,00000000 |
| <b>Gucy1a1</b>       | 1,7239646  | 0,0003536 | 0,00008205 |
| <b>Ccdc28a</b>       | 1,7246903  | 0,0000000 | 0,00000000 |
| <b>Cadm4</b>         | 1,72637005 | 0,0000000 | 0,00000000 |
| <b>Emp2</b>          | 1,72771884 | 0,0013148 | 0,00034030 |
| <b>Syne3</b>         | 1,72937978 | 0,0000000 | 0,00000000 |
| <b>Dtx4</b>          | 1,73186575 | 0,0000035 | 0,00000058 |
| <b>Ggta1</b>         | 1,73412185 | 0,0000004 | 0,00000006 |
| <b>Capn5</b>         | 1,73427932 | 0,0000000 | 0,00000000 |
| <b>Atf5</b>          | 1,73515856 | 0,0000000 | 0,00000000 |
| <b>Sparc</b>         | 1,736879   | 0,0000000 | 0,00000000 |
| <b>Vwa5a</b>         | 1,73882561 | 0,0000000 | 0,00000000 |
| <b>Kdm7a</b>         | 1,73972455 | 0,0000000 | 0,00000000 |
| <b>Kdm5b</b>         | 1,74146198 | 0,0000000 | 0,00000000 |
| <b>Lpar6</b>         | 1,74270562 | 0,0000000 | 0,00000000 |
| <b>Bmp8a</b>         | 1,74350689 | 0,0003951 | 0,00009270 |
| <b>Magi3</b>         | 1,74562411 | 0,0000000 | 0,00000000 |
| <b>Thsd4</b>         | 1,74980477 | 0,0011100 | 0,00028308 |
| <b>Yipf2</b>         | 1,75138048 | 0,0000000 | 0,00000000 |
| <b>Col4a1</b>        | 1,75315805 | 0,0000000 | 0,00000000 |
| <b>BC043934</b>      | 1,75461677 | 0,0000000 | 0,00000000 |
| <b>Gm11696</b>       | 1,75615523 | 0,0000005 | 0,00000008 |
| <b>Acad12</b>        | 1,75648524 | 0,0000000 | 0,00000000 |
| <b>Crim1</b>         | 1,75809038 | 0,0000000 | 0,00000000 |
| <b>Inka2</b>         | 1,7603129  | 0,0001708 | 0,00003723 |
| <b>Nobox</b>         | 1,76377122 | 0,0010901 | 0,00027759 |
| <b>Serinc3</b>       | 1,7664747  | 0,0000000 | 0,00000000 |

|                      |            |           |            |
|----------------------|------------|-----------|------------|
| <b>Fosb</b>          | 1,76661178 | 0,0000008 | 0,00000013 |
| <b>Hsd3b1</b>        | 1,76663538 | 0,0011243 | 0,00028705 |
| <b>Hspb2</b>         | 1,76678803 | 0,0000000 | 0,00000000 |
| <b>Hmga2</b>         | 1,76922655 | 0,0000000 | 0,00000000 |
| <b>C920009B18Rik</b> | 1,77067293 | 0,0000000 | 0,00000000 |
| <b>Tinagl1</b>       | 1,77192134 | 0,0000317 | 0,00000612 |
| <b>Slc11a1</b>       | 1,77503182 | 0,0000022 | 0,00000037 |
| <b>Entpd2</b>        | 1,77588151 | 0,0004959 | 0,00011846 |
| <b>Gstm7</b>         | 1,77643594 | 0,0000000 | 0,00000000 |
| <b>Klhdc8b</b>       | 1,77691855 | 0,0000000 | 0,00000000 |
| <b>Trp53cor1</b>     | 1,77709168 | 0,0000000 | 0,00000000 |
| <b>Tsc22d1</b>       | 1,77819942 | 0,0000000 | 0,00000000 |
| <b>Hmgcl1</b>        | 1,77832417 | 0,0010772 | 0,00027414 |
| <b>Gm42901</b>       | 1,77832417 | 0,0010772 | 0,00027414 |
| <b>Phldb2</b>        | 1,77926288 | 0,0000000 | 0,00000000 |
| <b>Jph2</b>          | 1,77932531 | 0,0013181 | 0,00034125 |
| <b>Gm37397</b>       | 1,78057093 | 0,0002183 | 0,00004851 |
| <b>Gm12138</b>       | 1,78420597 | 0,0000000 | 0,00000000 |
| <b>Itga2</b>         | 1,78452243 | 0,0000140 | 0,00000256 |
| <b>Serpib8</b>       | 1,78455097 | 0,0000012 | 0,00000019 |
| <b>Stom</b>          | 1,78456064 | 0,0000000 | 0,00000000 |
| <b>9130023H24Rik</b> | 1,78475285 | 0,0000000 | 0,00000000 |
| <b>Tulp1</b>         | 1,78539749 | 0,0004591 | 0,00010904 |
| <b>Gm15850</b>       | 1,78651546 | 0,0001219 | 0,00002597 |
| <b>Zfp36</b>         | 1,78719898 | 0,0000000 | 0,00000000 |
| <b>Mapre3</b>        | 1,78903365 | 0,0000000 | 0,00000000 |
| <b>Cst6</b>          | 1,79094597 | 0,0000000 | 0,00000000 |
| <b>Fam161a</b>       | 1,79138602 | 0,0003532 | 0,00008195 |
| <b>Ssc4d</b>         | 1,79563411 | 0,0000000 | 0,00000000 |
| <b>Tiam2</b>         | 1,79690216 | 0,0000000 | 0,00000000 |
| <b>H2-M10.5-ps1</b>  | 1,7972992  | 0,0009862 | 0,00024914 |
| <b>Cracdl</b>        | 1,79731574 | 0,0007225 | 0,00017846 |
| <b>Ephx1</b>         | 1,79734027 | 0,0000000 | 0,00000000 |
| <b>Atf6</b>          | 1,79749122 | 0,0000000 | 0,00000000 |
| <b>Plat</b>          | 1,7995395  | 0,0000000 | 0,00000000 |
| <b>Cdk14</b>         | 1,80075436 | 0,0000000 | 0,00000000 |
| <b>Angpt2</b>        | 1,8024121  | 0,0000000 | 0,00000000 |
| <b>A930033H14Rik</b> | 1,80241974 | 0,0000804 | 0,00001670 |
| <b>Rhpn2</b>         | 1,80273983 | 0,0000201 | 0,00000376 |
| <b>Rgs16</b>         | 1,8027542  | 0,0000000 | 0,00000000 |
| <b>Tlr3</b>          | 1,80362114 | 0,0000000 | 0,00000000 |
| <b>Tor4a</b>         | 1,80403014 | 0,0000000 | 0,00000000 |

|                      |            |           |            |
|----------------------|------------|-----------|------------|
| <b>Ces2g</b>         | 1,80436469 | 0,0009648 | 0,00024328 |
| <b>Cib4</b>          | 1,80436469 | 0,0009648 | 0,00024328 |
| <b>Gm11638</b>       | 1,80799258 | 0,0009423 | 0,00023738 |
| <b>Rtl5</b>          | 1,80816918 | 0,0000276 | 0,00000528 |
| <b>Maf</b>           | 1,8101436  | 0,0000000 | 0,00000000 |
| <b>Adam8</b>         | 1,81027859 | 0,0000012 | 0,00000020 |
| <b>Tmeff2</b>        | 1,81036626 | 0,0004041 | 0,00009494 |
| <b>Mpv17l</b>        | 1,81104518 | 0,0000000 | 0,00000000 |
| <b>Pinlyp</b>        | 1,81146711 | 0,0009363 | 0,00023559 |
| <b>Duox2</b>         | 1,81146711 | 0,0009363 | 0,00023559 |
| <b>Gm7936</b>        | 1,81260942 | 0,0000004 | 0,00000006 |
| <b>Bcl6</b>          | 1,81311236 | 0,0000000 | 0,00000000 |
| <b>Aldh1l2</b>       | 1,81355938 | 0,0000000 | 0,00000000 |
| <b>Trim17</b>        | 1,81475727 | 0,0000053 | 0,00000091 |
| <b>Coro2a</b>        | 1,8150761  | 0,0006975 | 0,00017149 |
| <b>Fgfr1</b>         | 1,81574926 | 0,0000000 | 0,00000000 |
| <b>Ankrd42</b>       | 1,81632815 | 0,0000000 | 0,00000000 |
| <b>Dgat2</b>         | 1,81963359 | 0,0000000 | 0,00000000 |
| <b>Fam43a</b>        | 1,82058114 | 0,0004656 | 0,00011073 |
| <b>D330050G23Rik</b> | 1,82075481 | 0,0000242 | 0,00000460 |
| <b>Plk3</b>          | 1,82573953 | 0,0000000 | 0,00000000 |
| <b>Olfir56</b>       | 1,82587557 | 0,0003694 | 0,00008612 |
| <b>Nectin4</b>       | 1,82619827 | 0,0009059 | 0,00022726 |
| <b>Map3k9</b>        | 1,82702462 | 0,0000003 | 0,00000004 |
| <b>Adam23</b>        | 1,82710601 | 0,0000000 | 0,00000000 |
| <b>Fcgrt</b>         | 1,83058612 | 0,0000000 | 0,00000000 |
| <b>Pcolce2</b>       | 1,83059    | 0,0000619 | 0,00001258 |
| <b>Tymp</b>          | 1,83425241 | 0,0000000 | 0,00000001 |
| <b>Vmac</b>          | 1,83720084 | 0,0000000 | 0,00000000 |
| <b>Ctsh</b>          | 1,83749117 | 0,0000000 | 0,00000000 |
| <b>Bmp1</b>          | 1,83819218 | 0,0000000 | 0,00000000 |
| <b>Apol10b</b>       | 1,83912496 | 0,0008236 | 0,00020545 |
| <b>Gm11639</b>       | 1,83932529 | 0,0007398 | 0,00018309 |
| <b>Guca1a</b>        | 1,83975697 | 0,0000000 | 0,00000000 |
| <b>Tec</b>           | 1,84053456 | 0,0000000 | 0,00000000 |
| <b>4930447F24Rik</b> | 1,84249265 | 0,0000563 | 0,00001137 |
| <b>Gch1</b>          | 1,84314715 | 0,0000001 | 0,00000001 |
| <b>B4galnt3</b>      | 1,84339828 | 0,0017456 | 0,00046228 |
| <b>Bcam</b>          | 1,84916211 | 0,0000000 | 0,00000000 |
| <b>Gm11490</b>       | 1,85010903 | 0,0014018 | 0,00036458 |
| <b>Jup</b>           | 1,85125263 | 0,0000000 | 0,00000000 |
| <b>Plin2</b>         | 1,85145833 | 0,0000000 | 0,00000000 |

|                      |            |           |            |
|----------------------|------------|-----------|------------|
| <b>E230013L22Rik</b> | 1,85227842 | 0,0007694 | 0,00019111 |
| <b>Camk2b</b>        | 1,85354633 | 0,0000000 | 0,00000000 |
| <b>Ano1</b>          | 1,85477798 | 0,0000000 | 0,00000000 |
| <b>8030451A03Rik</b> | 1,8553003  | 0,0007099 | 0,00017509 |
| <b>Ptk7</b>          | 1,85824174 | 0,0000002 | 0,00000003 |
| <b>Prss56</b>        | 1,85915058 | 0,0013181 | 0,00034127 |
| <b>Chac1</b>         | 1,85993682 | 0,0000000 | 0,00000000 |
| <b>Cd1d1</b>         | 1,86151733 | 0,0001281 | 0,00002739 |
| <b>Rbpms2</b>        | 1,86451574 | 0,0000000 | 0,00000000 |
| <b>Fam117a</b>       | 1,86819294 | 0,0000011 | 0,00000018 |
| <b>Efnb2</b>         | 1,86927782 | 0,0000000 | 0,00000000 |
| <b>Rimbp3</b>        | 1,86967327 | 0,0000003 | 0,00000004 |
| <b>Tmem229b</b>      | 1,8705056  | 0,0000000 | 0,00000000 |
| <b>Egr2</b>          | 1,87161346 | 0,0016284 | 0,00042906 |
| <b>Serpinf1</b>      | 1,8746418  | 0,0000000 | 0,00000000 |
| <b>Atp10b</b>        | 1,87532343 | 0,0000001 | 0,00000001 |
| <b>Wdr45</b>         | 1,87546689 | 0,0000000 | 0,00000000 |
| <b>Gm15753</b>       | 1,87773884 | 0,0007098 | 0,00017501 |
| <b>Hrh1</b>          | 1,87824964 | 0,0007122 | 0,00017568 |
| <b>Glis3</b>         | 1,87892372 | 0,0000000 | 0,00000000 |
| <b>Isoc2b</b>        | 1,8791344  | 0,0000000 | 0,00000000 |
| <b>Abca8b</b>        | 1,87919949 | 0,0000000 | 0,00000000 |
| <b>Tgif1</b>         | 1,87977824 | 0,0000000 | 0,00000000 |
| <b>Olig3</b>         | 1,88047657 | 0,0006347 | 0,00015467 |
| <b>Coll2a1</b>       | 1,88236857 | 0,0000000 | 0,00000000 |
| <b>P2rx3</b>         | 1,88399028 | 0,0005128 | 0,00012291 |
| <b>Tnfrsf12a</b>     | 1,88546585 | 0,0000000 | 0,00000000 |
| <b>Grik3</b>         | 1,88562646 | 0,0000000 | 0,00000000 |
| <b>Gm20005</b>       | 1,88571268 | 0,0000077 | 0,00000136 |
| <b>Hid1</b>          | 1,88670053 | 0,0000000 | 0,00000000 |
| <b>Cd68</b>          | 1,88804298 | 0,0000000 | 0,00000000 |
| <b>Slc40a1</b>       | 1,88887907 | 0,0000000 | 0,00000000 |
| <b>Steap1</b>        | 1,88963751 | 0,0000000 | 0,00000000 |
| <b>Gsta5</b>         | 1,89173038 | 0,0002601 | 0,00005872 |
| <b>Gm12854</b>       | 1,89483469 | 0,0000000 | 0,00000000 |
| <b>Rln1</b>          | 1,8975674  | 0,0011920 | 0,00030588 |
| <b>Trim47</b>        | 1,89767906 | 0,0000000 | 0,00000000 |
| <b>Scrt1</b>         | 1,89861362 | 0,0006384 | 0,00015563 |
| <b>Pde7b</b>         | 1,90109842 | 0,0000000 | 0,00000000 |
| <b>Tmem102</b>       | 1,9026744  | 0,0013788 | 0,00035826 |
| <b>Gm14808</b>       | 1,90352349 | 0,0000005 | 0,00000007 |
| <b>Hsd11b1</b>       | 1,90384465 | 0,0000000 | 0,00000000 |

|                      |            |           |            |
|----------------------|------------|-----------|------------|
| <b>Psme2</b>         | 1,90490207 | 0,0000000 | 0,00000000 |
| <b>Flnc</b>          | 1,90580271 | 0,0000136 | 0,00000248 |
| <b>Bpifa2</b>        | 1,90604347 | 0,0006347 | 0,00015465 |
| <b>Mettl27</b>       | 1,90613673 | 0,0000000 | 0,00000000 |
| <b>Pcdhb3</b>        | 1,90718722 | 0,0006416 | 0,00015651 |
| <b>Igsf23</b>        | 1,9098204  | 0,0000013 | 0,00000021 |
| <b>Gm15704</b>       | 1,91102407 | 0,0006027 | 0,00014651 |
| <b>Papln</b>         | 1,91177241 | 0,0000000 | 0,00000000 |
| <b>Sec16b</b>        | 1,91407385 | 0,0000000 | 0,00000000 |
| <b>Tnfrsf1b</b>      | 1,9142587  | 0,0000437 | 0,00000865 |
| <b>Aldh6a1</b>       | 1,91618073 | 0,0000000 | 0,00000000 |
| <b>Shisa5</b>        | 1,9187639  | 0,0000000 | 0,00000000 |
| <b>Bpgm</b>          | 1,9197028  | 0,0000000 | 0,00000000 |
| <b>GlrX</b>          | 1,92253767 | 0,0000000 | 0,00000000 |
| <b>Iglon5</b>        | 1,92376644 | 0,0000045 | 0,00000078 |
| <b>Nedd9</b>         | 1,92501887 | 0,0000339 | 0,00000658 |
| <b>Bcar3</b>         | 1,92614922 | 0,0000000 | 0,00000000 |
| <b>Esyt1</b>         | 1,9292159  | 0,0000000 | 0,00000000 |
| <b>Pcdhb16</b>       | 1,93080899 | 0,0000000 | 0,00000000 |
| <b>Gm5617</b>        | 1,93452711 | 0,0000000 | 0,00000000 |
| <b>2810402E24Rik</b> | 1,93548992 | 0,0000000 | 0,00000000 |
| <b>Dmkn</b>          | 1,93850714 | 0,0005485 | 0,00013231 |
| <b>Zswim4</b>        | 1,93975303 | 0,0000000 | 0,00000000 |
| <b>Mmp10</b>         | 1,94173685 | 0,0005450 | 0,00013139 |
| <b>Trim66</b>        | 1,94804319 | 0,0008406 | 0,00021007 |
| <b>Neurl1a</b>       | 1,9489109  | 0,0000000 | 0,00000000 |
| <b>F11r</b>          | 1,9522613  | 0,0000000 | 0,00000000 |
| <b>Klhl26</b>        | 1,95270656 | 0,0000000 | 0,00000000 |
| <b>Gm37855</b>       | 1,95608957 | 0,0000000 | 0,00000000 |
| <b>Styx11</b>        | 1,95907017 | 0,0007961 | 0,00019826 |
| <b>Ano2</b>          | 1,95911509 | 0,0001346 | 0,00002884 |
| <b>Pon3</b>          | 1,95959241 | 0,0000000 | 0,00000000 |
| <b>Tmem119</b>       | 1,96095641 | 0,0005586 | 0,00013489 |
| <b>Ell2</b>          | 1,96118679 | 0,0000000 | 0,00000000 |
| <b>Apoa2</b>         | 1,96170543 | 0,0000042 | 0,00000071 |
| <b>Galr2</b>         | 1,9618053  | 0,0000000 | 0,00000000 |
| <b>Ypel3</b>         | 1,96242286 | 0,0000000 | 0,00000000 |
| <b>Gsap</b>          | 1,9629209  | 0,0011934 | 0,00030631 |
| <b>Cstb</b>          | 1,96399738 | 0,0000000 | 0,00000000 |
| <b>Prune2</b>        | 1,96476946 | 0,0000000 | 0,00000000 |
| <b>Gcnt2</b>         | 1,96547323 | 0,0000000 | 0,00000000 |
| <b>Pnck</b>          | 1,9664037  | 0,0000000 | 0,00000000 |



|                      |            |           |            |
|----------------------|------------|-----------|------------|
| <b>Tnfsf10</b>       | 1,9675809  | 0,0004845 | 0,00011564 |
| <b>Dusp5</b>         | 1,96813737 | 0,0000007 | 0,00000012 |
| <b>Gsta2</b>         | 1,96898258 | 0,0000000 | 0,00000000 |
| <b>Pcdhb7</b>        | 1,96901388 | 0,0000610 | 0,00001240 |
| <b>Ifit1bl1</b>      | 1,97026089 | 0,0007538 | 0,00018685 |
| <b>Gm45713</b>       | 1,97078664 | 0,0001461 | 0,00003148 |
| <b>Ppm1j</b>         | 1,97177992 | 0,0005878 | 0,00014252 |
| <b>Irs1</b>          | 1,97569574 | 0,0000000 | 0,00000000 |
| <b>Gm37170</b>       | 1,97581134 | 0,0000014 | 0,00000022 |
| <b>1700057H21Rik</b> | 1,97584518 | 0,0003818 | 0,00008929 |
| <b>Serinc5</b>       | 1,97622882 | 0,0000000 | 0,00000000 |
| <b>Gm13110</b>       | 1,976444   | 0,0000000 | 0,00000000 |
| <b>Ptprn</b>         | 1,97688718 | 0,0000629 | 0,00001281 |
| <b>4930539M17Rik</b> | 1,97713076 | 0,0007416 | 0,00018361 |
| <b>Arid5b</b>        | 1,97716767 | 0,0000000 | 0,00000000 |
| <b>Aldh1l1</b>       | 1,98453018 | 0,0000000 | 0,00000000 |
| <b>Mthfd2l</b>       | 1,98483144 | 0,0000000 | 0,00000000 |
| <b>Cpt1c</b>         | 1,98485155 | 0,0000000 | 0,00000000 |
| <b>S100a11</b>       | 1,9853842  | 0,0000000 | 0,00000000 |
| <b>Fbxw9</b>         | 1,98721218 | 0,0000000 | 0,00000000 |
| <b>Odf3l1</b>        | 1,98812252 | 0,0000000 | 0,00000000 |
| <b>Dio2</b>          | 1,98816233 | 0,0000931 | 0,00001948 |
| <b>Herc3</b>         | 1,98820461 | 0,0000000 | 0,00000000 |
| <b>Atoh8</b>         | 1,98827322 | 0,0000000 | 0,00000000 |
| <b>Ilk</b>           | 1,98985433 | 0,0010244 | 0,00025984 |
| <b>Adamts7</b>       | 1,99333356 | 0,0000076 | 0,00000135 |
| <b>Mcub</b>          | 1,993689   | 0,0001488 | 0,00003209 |
| <b>Gm8860</b>        | 1,99684351 | 0,0004062 | 0,00009545 |
| <b>Adamts4</b>       | 1,99734027 | 0,0000000 | 0,00000000 |
| <b>Syt11</b>         | 1,99820372 | 0,0000000 | 0,00000000 |
| <b>Cxcl1</b>         | 1,99988561 | 0,0002125 | 0,00004708 |
| <b>Wnt3</b>          | 2,00016036 | 0,0004161 | 0,00009789 |
| <b>Adssl1</b>        | 2,00016828 | 0,0000000 | 0,00000000 |
| <b>Fahd1</b>         | 2,00343172 | 0,0000000 | 0,00000000 |
| <b>Gm12187</b>       | 2,0041593  | 0,0004239 | 0,00009994 |
| <b>Gm7665</b>        | 2,00519248 | 0,0000000 | 0,00000000 |
| <b>4930533K18Rik</b> | 2,00647074 | 0,0016682 | 0,00044010 |
| <b>Gm10602</b>       | 2,00895419 | 0,0000000 | 0,00000000 |
| <b>Gm10461</b>       | 2,01118049 | 0,0000004 | 0,00000006 |
| <b>Tnfrsf26</b>      | 2,01150644 | 0,0007140 | 0,00017617 |
| <b>Gm15663</b>       | 2,01214641 | 0,0002365 | 0,00005292 |
| <b>Fam13c</b>        | 2,0155199  | 0,0000000 | 0,00000000 |

|                      |            |           |            |
|----------------------|------------|-----------|------------|
| <b>Rfpl4b</b>        | 2,01600684 | 0,0003537 | 0,00008210 |
| <b>Serpini1</b>      | 2,01760834 | 0,0000000 | 0,00000000 |
| <b>Pacrg</b>         | 2,0187318  | 0,0002259 | 0,00005029 |
| <b>Trim56</b>        | 2,02042824 | 0,0000000 | 0,00000000 |
| <b>Gm4755</b>        | 2,02261847 | 0,0000180 | 0,00000335 |
| <b>Xkr6</b>          | 2,02322632 | 0,0003816 | 0,00008923 |
| <b>Mest</b>          | 2,02380142 | 0,0000000 | 0,00000000 |
| <b>Gm42815</b>       | 2,0266634  | 0,0000518 | 0,00001040 |
| <b>Card10</b>        | 2,0285316  | 0,0000000 | 0,00000000 |
| <b>Spred3</b>        | 2,02963046 | 0,0000000 | 0,00000000 |
| <b>Dhrs9</b>         | 2,03219364 | 0,0003555 | 0,00008255 |
| <b>Slit2</b>         | 2,03258296 | 0,0000000 | 0,00000000 |
| <b>Hes1</b>          | 2,03278391 | 0,0000000 | 0,00000000 |
| <b>Gmpr</b>          | 2,03545798 | 0,0000000 | 0,00000000 |
| <b>Def6</b>          | 2,03702045 | 0,0000000 | 0,00000000 |
| <b>Sema3c</b>        | 2,03832071 | 0,0000000 | 0,00000000 |
| <b>9230114K14Rik</b> | 2,04068389 | 0,0000000 | 0,00000000 |
| <b>Rom1</b>          | 2,04276053 | 0,0000000 | 0,00000000 |
| <b>Lipc</b>          | 2,04449625 | 0,0001837 | 0,00004022 |
| <b>Syt8</b>          | 2,0449586  | 0,0003521 | 0,00008165 |
| <b>Zscan4d</b>       | 2,0449586  | 0,0003521 | 0,00008165 |
| <b>Stbd1</b>         | 2,04572378 | 0,0009877 | 0,00024963 |
| <b>Sag</b>           | 2,04588442 | 0,0000000 | 0,00000000 |
| <b>Map2k3os</b>      | 2,04629527 | 0,0000000 | 0,00000000 |
| <b>Lgals9</b>        | 2,04962034 | 0,0000000 | 0,00000000 |
| <b>Rfx4</b>          | 2,04980634 | 0,0001766 | 0,00003858 |
| <b>Tspyl4</b>        | 2,05102637 | 0,0000000 | 0,00000000 |
| <b>Gm28818</b>       | 2,05337773 | 0,0003733 | 0,00008713 |
| <b>Gm26651</b>       | 2,06007064 | 0,0014401 | 0,00037530 |
| <b>Oit3</b>          | 2,06354879 | 0,0013377 | 0,00034675 |
| <b>Ctso</b>          | 2,06367315 | 0,0000000 | 0,00000000 |
| <b>Gm10575</b>       | 2,06936458 | 0,0000124 | 0,00000226 |
| <b>Scn2a</b>         | 2,06999246 | 0,0000000 | 0,00000000 |
| <b>Mical2</b>        | 2,07262741 | 0,0000000 | 0,00000000 |
| <b>Lcp1</b>          | 2,07292579 | 0,0000000 | 0,00000000 |
| <b>Rsph1</b>         | 2,07760011 | 0,0000001 | 0,00000002 |
| <b>Socs1</b>         | 2,07810555 | 0,0000000 | 0,00000000 |
| <b>Slc5a3</b>        | 2,07888438 | 0,0000000 | 0,00000000 |
| <b>Hrc</b>           | 2,08457762 | 0,0000350 | 0,00000682 |
| <b>Pcdhb15</b>       | 2,08516175 | 0,0000000 | 0,00000000 |
| <b>Rnd1</b>          | 2,08551189 | 0,0000000 | 0,00000000 |
| <b>Sarm1</b>         | 2,08685122 | 0,0000000 | 0,00000000 |

|                      |            |           |            |
|----------------------|------------|-----------|------------|
| <b>Dnmt3l</b>        | 2,08739353 | 0,0002702 | 0,00006128 |
| <b>Gm11216</b>       | 2,08939294 | 0,0002975 | 0,00006809 |
| <b>Gadd45a</b>       | 2,08967923 | 0,0000000 | 0,00000000 |
| <b>Phkg1</b>         | 2,09002453 | 0,0000000 | 0,00000000 |
| <b>Capg</b>          | 2,09008989 | 0,0000000 | 0,00000000 |
| <b>Cebpd</b>         | 2,09060971 | 0,0000000 | 0,00000000 |
| <b>Alpk2</b>         | 2,09362845 | 0,0002930 | 0,00006692 |
| <b>Tmem92</b>        | 2,09534689 | 0,0002833 | 0,00006455 |
| <b>Tcaf2</b>         | 2,09563774 | 0,0000000 | 0,00000000 |
| <b>Thrb</b>          | 2,09831899 | 0,0001797 | 0,00003931 |
| <b>Gm15910</b>       | 2,10338166 | 0,0000002 | 0,00000003 |
| <b>Dusp14</b>        | 2,10367058 | 0,0000000 | 0,00000000 |
| <b>Lrtm2</b>         | 2,10602296 | 0,0000760 | 0,00001570 |
| <b>Ttll7</b>         | 2,1103024  | 0,0000000 | 0,00000000 |
| <b>Hsd17b7</b>       | 2,11371665 | 0,0000000 | 0,00000000 |
| <b>Irak2</b>         | 2,11687397 | 0,0000000 | 0,00000000 |
| <b>Reps2</b>         | 2,11803389 | 0,0002589 | 0,00005841 |
| <b>Fut4</b>          | 2,11979007 | 0,0001258 | 0,00002684 |
| <b>Bgn</b>           | 2,11983487 | 0,0002632 | 0,00005950 |
| <b>4930447N08Rik</b> | 2,12322547 | 0,0004497 | 0,00010662 |
| <b>Ddah1</b>         | 2,12335379 | 0,0000000 | 0,00000000 |
| <b>Cma1</b>          | 2,12485059 | 0,0002459 | 0,00005516 |
| <b>Cstad</b>         | 2,12529125 | 0,0001788 | 0,00003910 |
| <b>Slc6a9</b>        | 2,13080142 | 0,0000000 | 0,00000000 |
| <b>Gm32591</b>       | 2,13169143 | 0,0000004 | 0,00000006 |
| <b>Gstm6</b>         | 2,13252855 | 0,0000000 | 0,00000000 |
| <b>Lhx6</b>          | 2,13625418 | 0,0000099 | 0,00000177 |
| <b>Upp1</b>          | 2,13768138 | 0,0000192 | 0,00000358 |
| <b>Svop</b>          | 2,13905672 | 0,0002081 | 0,00004603 |
| <b>Anxa2</b>         | 2,14228759 | 0,0000000 | 0,00000000 |
| <b>Loxl4</b>         | 2,14260495 | 0,0000000 | 0,00000000 |
| <b>Col4a5</b>        | 2,14405128 | 0,0000000 | 0,00000000 |
| <b>Mucl3</b>         | 2,14636055 | 0,0000072 | 0,00000128 |
| <b>1700003M07Rik</b> | 2,14669956 | 0,0009877 | 0,00024957 |
| <b>Psme2b</b>        | 2,14745906 | 0,0000000 | 0,00000000 |
| <b>Uox</b>           | 2,14881575 | 0,0000566 | 0,00001142 |
| <b>AW011738</b>      | 2,15039036 | 0,0000000 | 0,00000000 |
| <b>Pcdhb11</b>       | 2,15094262 | 0,0000000 | 0,00000000 |
| <b>Rcan2</b>         | 2,15249727 | 0,0002540 | 0,00005721 |
| <b>Ccdc96</b>        | 2,15355732 | 0,0000000 | 0,00000000 |
| <b>Siglecg</b>       | 2,15570246 | 0,0001993 | 0,00004395 |
| <b>AI839979</b>      | 2,16271317 | 0,0000000 | 0,00000000 |

|                      |            |           |            |
|----------------------|------------|-----------|------------|
| <b>Piwil4</b>        | 2,16448265 | 0,0002130 | 0,00004721 |
| <b>Mvp</b>           | 2,16606531 | 0,0000000 | 0,00000000 |
| <b>Tek</b>           | 2,17030707 | 0,0002102 | 0,00004652 |
| <b>Dcxr</b>          | 2,1713572  | 0,0000000 | 0,00000000 |
| <b>Tmem217</b>       | 2,17645526 | 0,0002307 | 0,00005146 |
| <b>Zscan4c</b>       | 2,17725467 | 0,0008490 | 0,00021232 |
| <b>S100a8</b>        | 2,17729609 | 0,0002071 | 0,00004579 |
| <b>Pcdhb9</b>        | 2,17778997 | 0,0000430 | 0,00000850 |
| <b>Defb25</b>        | 2,17817578 | 0,0000346 | 0,00000673 |
| <b>Nol4</b>          | 2,18076595 | 0,0000000 | 0,00000000 |
| <b>Tcam1</b>         | 2,18288798 | 0,0000226 | 0,00000427 |
| <b>Cpne5</b>         | 2,18367303 | 0,0008212 | 0,00020475 |
| <b>Cngb1</b>         | 2,18769198 | 0,0000000 | 0,00000000 |
| <b>Cnga3</b>         | 2,19527806 | 0,0001887 | 0,00004140 |
| <b>Fgf1</b>          | 2,19753693 | 0,0000000 | 0,00000000 |
| <b>Tmem202</b>       | 2,19808165 | 0,0000000 | 0,00000000 |
| <b>Gm43549</b>       | 2,19972088 | 0,0000000 | 0,00000000 |
| <b>Pcp4l1</b>        | 2,20001444 | 0,0001867 | 0,00004092 |
| <b>Pcdh9</b>         | 2,20059174 | 0,0000000 | 0,00000000 |
| <b>Cyp3a16</b>       | 2,20363474 | 0,0000610 | 0,00001239 |
| <b>Ddx4</b>          | 2,20387588 | 0,0000570 | 0,00001151 |
| <b>2210010C04Rik</b> | 2,20534051 | 0,0000017 | 0,00000027 |
| <b>Ccn4</b>          | 2,20706011 | 0,0000000 | 0,00000000 |
| <b>Sgk1</b>          | 2,20852808 | 0,0000000 | 0,00000000 |
| <b>Fam214b</b>       | 2,20878358 | 0,0000000 | 0,00000000 |
| <b>Ank3</b>          | 2,21024568 | 0,0000000 | 0,00000000 |
| <b>Sv2b</b>          | 2,21172112 | 0,0000000 | 0,00000000 |
| <b>Tor3a</b>         | 2,21282093 | 0,0000000 | 0,00000000 |
| <b>Ptges</b>         | 2,21455415 | 0,0002292 | 0,00005111 |
| <b>Vcl</b>           | 2,21716023 | 0,0000000 | 0,00000000 |
| <b>Pwwp3b</b>        | 2,21850728 | 0,0000000 | 0,00000000 |
| <b>Gm26616</b>       | 2,21862569 | 0,0000000 | 0,00000000 |
| <b>Psd2</b>          | 2,22672072 | 0,0000313 | 0,00000606 |
| <b>Gm16201</b>       | 2,2274807  | 0,0000035 | 0,00000060 |
| <b>Timp1</b>         | 2,22756959 | 0,0000000 | 0,00000000 |
| <b>C130013H08Rik</b> | 2,22875209 | 0,0000000 | 0,00000000 |
| <b>Sult6b1</b>       | 2,22912923 | 0,0000000 | 0,00000000 |
| <b>Tbc1d2</b>        | 2,22920759 | 0,0000000 | 0,00000000 |
| <b>C130083M11Rik</b> | 2,2298371  | 0,0000000 | 0,00000000 |
| <b>Ccnd1</b>         | 2,23010944 | 0,0000000 | 0,00000000 |
| <b>Vamp1</b>         | 2,23220055 | 0,0000000 | 0,00000000 |
| <b>A230083G16Rik</b> | 2,23566463 | 0,0000001 | 0,00000001 |

|                      |            |           |            |
|----------------------|------------|-----------|------------|
| <b>Marchf4</b>       | 2,23656466 | 0,0001033 | 0,00002172 |
| <b>Neurl3</b>        | 2,23758105 | 0,0000000 | 0,00000000 |
| <b>Gm4524</b>        | 2,23993211 | 0,0000000 | 0,00000000 |
| <b>Slc2a9</b>        | 2,24113486 | 0,0000000 | 0,00000000 |
| <b>Pcdhb8</b>        | 2,24129195 | 0,0000274 | 0,00000525 |
| <b>Sned1</b>         | 2,24212237 | 0,0000000 | 0,00000000 |
| <b>Eif1ad8</b>       | 2,24264705 | 0,0001512 | 0,00003267 |
| <b>Hao1</b>          | 2,24622011 | 0,0000335 | 0,00000649 |
| <b>Septin4</b>       | 2,25063762 | 0,0000000 | 0,00000000 |
| <b>9130008F23Rik</b> | 2,25127411 | 0,0000000 | 0,00000000 |
| <b>H1f11-ps</b>      | 2,2519974  | 0,0000670 | 0,00001370 |
| <b>Gm16104</b>       | 2,25236631 | 0,0000019 | 0,00000031 |
| <b>Elfn1</b>         | 2,25301964 | 0,0005351 | 0,00012871 |
| <b>Ttl6</b>          | 2,25580668 | 0,0005303 | 0,00012751 |
| <b>Pcdhb2</b>        | 2,25679869 | 0,0000005 | 0,00000007 |
| <b>Pramel31</b>      | 2,25828356 | 0,0005760 | 0,00013939 |
| <b>Rbms3</b>         | 2,25982379 | 0,0000003 | 0,00000005 |
| <b>Gm12216</b>       | 2,26060296 | 0,0002933 | 0,00006699 |
| <b>Dpf3</b>          | 2,26193769 | 0,0000093 | 0,00000167 |
| <b>Gm5546</b>        | 2,26377497 | 0,0000000 | 0,00000000 |
| <b>Fosl1</b>         | 2,2643095  | 0,0000002 | 0,00000002 |
| <b>Gm20257</b>       | 2,26629238 | 0,0000000 | 0,00000000 |
| <b>Adams14</b>       | 2,26696854 | 0,0000000 | 0,00000000 |
| <b>Rras</b>          | 2,27128516 | 0,0000000 | 0,00000000 |
| <b>Camk1d</b>        | 2,27316768 | 0,0017545 | 0,00046522 |
| <b>Lpin3</b>         | 2,27694556 | 0,0000000 | 0,00000000 |
| <b>Btla</b>          | 2,27865836 | 0,0000682 | 0,00001398 |
| <b>Styk1</b>         | 2,28110886 | 0,0001540 | 0,00003333 |
| <b>Uchl1</b>         | 2,28162522 | 0,0000000 | 0,00000000 |
| <b>Trim16</b>        | 2,28827934 | 0,0000000 | 0,00000000 |
| <b>Samd5</b>         | 2,29029723 | 0,0000000 | 0,00000000 |
| <b>Gngt2</b>         | 2,29399602 | 0,0016467 | 0,00043410 |
| <b>Podn</b>          | 2,2985527  | 0,0001240 | 0,00002644 |
| <b>Trp53inp1</b>     | 2,29952869 | 0,0000000 | 0,00000000 |
| <b>Neb</b>           | 2,30253942 | 0,0000000 | 0,00000000 |
| <b>Frat2</b>         | 2,30263781 | 0,0000000 | 0,00000001 |
| <b>Slc39a4</b>       | 2,3027069  | 0,0000203 | 0,00000380 |
| <b>Pqlc3</b>         | 2,30304807 | 0,0000000 | 0,00000000 |
| <b>Spp1</b>          | 2,30329949 | 0,0000000 | 0,00000000 |
| <b>Pdlim2</b>        | 2,30788529 | 0,0000000 | 0,00000000 |
| <b>Gm13056</b>       | 2,30872343 | 0,0001191 | 0,00002534 |
| <b>Msrb3</b>         | 2,31052511 | 0,0000000 | 0,00000000 |

|                      |            |           |            |
|----------------------|------------|-----------|------------|
| <b>Igfbp6</b>        | 2,31451118 | 0,0000257 | 0,00000489 |
| <b>Scnn1a</b>        | 2,31582891 | 0,0000513 | 0,00001030 |
| <b>Gm5152</b>        | 2,32042464 | 0,0015140 | 0,00039622 |
| <b>Tm4sf1</b>        | 2,32075809 | 0,0000000 | 0,00000000 |
| <b>Pde4a</b>         | 2,32359642 | 0,0000000 | 0,00000000 |
| <b>Gm44386</b>       | 2,32476375 | 0,0000000 | 0,00000000 |
| <b>Igf2bp2</b>       | 2,32631439 | 0,0000000 | 0,00000000 |
| <b>Pkp2</b>          | 2,32644063 | 0,0000000 | 0,00000000 |
| <b>Ptprf</b>         | 2,327558   | 0,0000000 | 0,00000000 |
| <b>Calcoco1</b>      | 2,3281609  | 0,0000000 | 0,00000000 |
| <b>Usp17lc</b>       | 2,3308913  | 0,0001033 | 0,00002173 |
| <b>Gm8818</b>        | 2,33096136 | 0,0000000 | 0,00000000 |
| <b>Hacd4</b>         | 2,33281234 | 0,0000000 | 0,00000000 |
| <b>2700046G09Rik</b> | 2,33488312 | 0,0000000 | 0,00000000 |
| <b>Shank1</b>        | 2,33789576 | 0,0000000 | 0,00000000 |
| <b>Pdcd4</b>         | 2,33884759 | 0,0000000 | 0,00000000 |
| <b>Ccdc189</b>       | 2,34435557 | 0,0000000 | 0,00000000 |
| <b>9530034E10Rik</b> | 2,34578897 | 0,0000946 | 0,00001980 |
| <b>Trim21</b>        | 2,3458533  | 0,0000000 | 0,00000000 |
| <b>Pcdh1</b>         | 2,34778451 | 0,0000000 | 0,00000000 |
| <b>Tmem72</b>        | 2,350519   | 0,0013287 | 0,00034416 |
| <b>Ypel5</b>         | 2,35125604 | 0,0000000 | 0,00000000 |
| <b>Aldh1a1</b>       | 2,35520238 | 0,0000859 | 0,00001789 |
| <b>0610009L18Rik</b> | 2,35602919 | 0,0000001 | 0,00000001 |
| <b>Gm44250</b>       | 2,35618539 | 0,0000000 | 0,00000000 |
| <b>Spsb2</b>         | 2,36030929 | 0,0000000 | 0,00000000 |
| <b>Ass1</b>          | 2,36203112 | 0,0000000 | 0,00000000 |
| <b>Mov10</b>         | 2,36250337 | 0,0000000 | 0,00000000 |
| <b>Gm26645</b>       | 2,36952137 | 0,0000007 | 0,00000010 |
| <b>H2aw</b>          | 2,36993425 | 0,0000000 | 0,00000000 |
| <b>H2-D1</b>         | 2,37279197 | 0,0000000 | 0,00000000 |
| <b>Cd79a</b>         | 2,37420431 | 0,0000010 | 0,00000015 |
| <b>Mt3</b>           | 2,38235657 | 0,0002876 | 0,00006562 |
| <b>Greb1</b>         | 2,38253971 | 0,0000000 | 0,00000000 |
| <b>Akp-ps1</b>       | 2,38411984 | 0,0000222 | 0,00000418 |
| <b>Slc22a4</b>       | 2,38551055 | 0,0000008 | 0,00000012 |
| <b>Gm5424</b>        | 2,39366779 | 0,0000000 | 0,00000000 |
| <b>Fosl2</b>         | 2,39429414 | 0,0000000 | 0,00000000 |
| <b>Pcdhb4</b>        | 2,39653651 | 0,0000000 | 0,00000000 |
| <b>Cntn1</b>         | 2,39741339 | 0,0000000 | 0,00000000 |
| <b>Cdkn1a</b>        | 2,39798428 | 0,0000000 | 0,00000000 |
| <b>Zcchc24</b>       | 2,40355044 | 0,0000000 | 0,00000000 |

|                 |            |           |            |
|-----------------|------------|-----------|------------|
| <b>Gpr35</b>    | 2,40719669 | 0,0000000 | 0,00000000 |
| <b>Pyroxd2</b>  | 2,40816507 | 0,0000000 | 0,00000000 |
| <b>Syn1</b>     | 2,41127012 | 0,0000000 | 0,00000000 |
| <b>Gbe1</b>     | 2,41306017 | 0,0000000 | 0,00000000 |
| <b>Gm3716</b>   | 2,41851831 | 0,0000000 | 0,00000000 |
| <b>Gm10800</b>  | 2,42505843 | 0,0000005 | 0,00000007 |
| <b>Jam2</b>     | 2,42881822 | 0,0000000 | 0,00000000 |
| <b>Pparg</b>    | 2,42933711 | 0,0000017 | 0,00000028 |
| <b>Gm12059</b>  | 2,42955359 | 0,0000000 | 0,00000000 |
| <b>Tcp11l2</b>  | 2,4346037  | 0,0000000 | 0,00000000 |
| <b>Tslp</b>     | 2,435082   | 0,0000000 | 0,00000000 |
| <b>Gsdmd</b>    | 2,44330388 | 0,0000000 | 0,00000000 |
| <b>Plekhh2</b>  | 2,44554727 | 0,0000000 | 0,00000000 |
| <b>Txlnb</b>    | 2,44645181 | 0,0000008 | 0,00000013 |
| <b>B2m</b>      | 2,4469379  | 0,0000000 | 0,00000000 |
| <b>Tent5c</b>   | 2,44989681 | 0,0000000 | 0,00000000 |
| <b>Mturn</b>    | 2,45056448 | 0,0000000 | 0,00000000 |
| <b>Psbm9</b>    | 2,45139067 | 0,0000854 | 0,00001778 |
| <b>P2ry6</b>    | 2,45157536 | 0,0000656 | 0,00001340 |
| <b>Nptx1</b>    | 2,45305759 | 0,0000000 | 0,00000000 |
| <b>Megf10</b>   | 2,45333225 | 0,0000000 | 0,00000000 |
| <b>Faim2</b>    | 2,45739247 | 0,0009340 | 0,00023483 |
| <b>Slc16a13</b> | 2,45834762 | 0,0000000 | 0,00000000 |
| <b>Gm28447</b>  | 2,46052278 | 0,0000001 | 0,00000002 |
| <b>Robo2</b>    | 2,46185427 | 0,0000030 | 0,00000049 |
| <b>Cyb5r2</b>   | 2,46214729 | 0,0000000 | 0,00000000 |
| <b>Gm12602</b>  | 2,46745354 | 0,0000000 | 0,00000000 |
| <b>Cnn2</b>     | 2,46806223 | 0,0000000 | 0,00000000 |
| <b>Mxd4</b>     | 2,47131692 | 0,0000000 | 0,00000000 |
| <b>Slco2a1</b>  | 2,47650098 | 0,0000001 | 0,00000001 |
| <b>Gm11816</b>  | 2,47670132 | 0,0000591 | 0,00001199 |
| <b>Gadd45g</b>  | 2,47840084 | 0,0000000 | 0,00000000 |
| <b>Sp110</b>    | 2,48041845 | 0,0000716 | 0,00001471 |
| <b>Ahnak</b>    | 2,48434457 | 0,0000000 | 0,00000000 |
| <b>Jag1</b>     | 2,4851173  | 0,0000000 | 0,00000000 |
| <b>Ccpg1os</b>  | 2,48547258 | 0,0000000 | 0,00000000 |
| <b>Chst11</b>   | 2,48912392 | 0,0000000 | 0,00000000 |
| <b>Dtx3l</b>    | 2,49527986 | 0,0000000 | 0,00000000 |
| <b>Azin2</b>    | 2,49538698 | 0,0000000 | 0,00000000 |
| <b>Glpr2</b>    | 2,4965854  | 0,0000000 | 0,00000000 |
| <b>Gstm1</b>    | 2,49665809 | 0,0000000 | 0,00000000 |
| <b>ligp1</b>    | 2,50100238 | 0,0000506 | 0,00001015 |

|                  |            |           |            |
|------------------|------------|-----------|------------|
| <b>Bcl11b</b>    | 2,51035471 | 0,0000060 | 0,00000104 |
| <b>Kcnk3</b>     | 2,51172301 | 0,0000463 | 0,00000922 |
| <b>Cdk5r2</b>    | 2,51174822 | 0,0000000 | 0,00000000 |
| <b>Sfxn3</b>     | 2,51378478 | 0,0000000 | 0,00000000 |
| <b>Tmem171</b>   | 2,51381869 | 0,0000502 | 0,00001005 |
| <b>Slc7a11</b>   | 2,5174001  | 0,0000000 | 0,00000000 |
| <b>Gfra1</b>     | 2,51767466 | 0,0000000 | 0,00000000 |
| <b>Arhgef19</b>  | 2,5196302  | 0,0000000 | 0,00000000 |
| <b>Niban1</b>    | 2,52218077 | 0,0000000 | 0,00000000 |
| <b>Hecw2</b>     | 2,52486749 | 0,0000000 | 0,00000000 |
| <b>Trp53inp2</b> | 2,52868497 | 0,0000000 | 0,00000000 |
| <b>Sod3</b>      | 2,52898469 | 0,0000000 | 0,00000000 |
| <b>Plcb2</b>     | 2,52965738 | 0,0000000 | 0,00000000 |
| <b>Selenop</b>   | 2,53656024 | 0,0000000 | 0,00000000 |
| <b>Ctsf</b>      | 2,53772462 | 0,0000000 | 0,00000000 |
| <b>Gm11734</b>   | 2,53828163 | 0,0000000 | 0,00000000 |
| <b>Gm9899</b>    | 2,53888394 | 0,0000453 | 0,00000900 |
| <b>Rida</b>      | 2,54182349 | 0,0000000 | 0,00000000 |
| <b>Usp17lb</b>   | 2,54246115 | 0,0007051 | 0,00017359 |
| <b>Gstm2-ps1</b> | 2,54293575 | 0,0000000 | 0,00000000 |
| <b>Esr2</b>      | 2,54384285 | 0,0000401 | 0,00000790 |
| <b>Adgra1</b>    | 2,54925011 | 0,0007068 | 0,00017418 |
| <b>Trim14</b>    | 2,55110084 | 0,0000000 | 0,00000000 |
| <b>Sec14l5</b>   | 2,55146369 | 0,0006621 | 0,00016205 |
| <b>Gpat3</b>     | 2,55364004 | 0,0000002 | 0,00000003 |
| <b>Susd3</b>     | 2,55378288 | 0,0000000 | 0,00000000 |
| <b>Arhgef28</b>  | 2,5538354  | 0,0000000 | 0,00000000 |
| <b>Oas1c</b>     | 2,5572971  | 0,0000000 | 0,00000000 |
| <b>Parp3</b>     | 2,55784076 | 0,0000000 | 0,00000000 |
| <b>Synm</b>      | 2,55911913 | 0,0000000 | 0,00000000 |
| <b>Mir22hg</b>   | 2,5637348  | 0,0000000 | 0,00000000 |
| <b>Asb2</b>      | 2,56670867 | 0,0000000 | 0,00000000 |
| <b>Pltp</b>      | 2,56677154 | 0,0000000 | 0,00000000 |
| <b>Unc5b</b>     | 2,57177879 | 0,0000000 | 0,00000000 |
| <b>Dusp10</b>    | 2,57407662 | 0,0000000 | 0,00000000 |
| <b>Aox1</b>      | 2,57531556 | 0,0000000 | 0,00000000 |
| <b>P2rx5</b>     | 2,57643921 | 0,0000000 | 0,00000000 |
| <b>Cp</b>        | 2,58045777 | 0,0000000 | 0,00000000 |
| <b>Cited4</b>    | 2,58234143 | 0,0000049 | 0,00000085 |
| <b>Slc37a2</b>   | 2,58727233 | 0,0000000 | 0,00000000 |
| <b>Mx1</b>       | 2,58753803 | 0,0000000 | 0,00000000 |
| <b>Dnah5</b>     | 2,58943153 | 0,0006134 | 0,00014923 |



|                      |            |           |            |
|----------------------|------------|-----------|------------|
| <b>Dusp27</b>        | 2,59287089 | 0,0000000 | 0,00000000 |
| <b>Cd109</b>         | 2,59384553 | 0,0000000 | 0,00000000 |
| <b>Gm10687</b>       | 2,59527434 | 0,0000000 | 0,00000000 |
| <b>Chit1</b>         | 2,59819302 | 0,0000345 | 0,00000671 |
| <b>Gldn</b>          | 2,59977848 | 0,0001028 | 0,00002162 |
| <b>Slc16a5</b>       | 2,60331977 | 0,0000000 | 0,00000000 |
| <b>Plch2</b>         | 2,60565892 | 0,0000001 | 0,00000001 |
| <b>Cald1</b>         | 2,60871046 | 0,0000000 | 0,00000000 |
| <b>Anxa1</b>         | 2,60921343 | 0,0000000 | 0,00000000 |
| <b>Gm21818</b>       | 2,61368842 | 0,0000334 | 0,00000648 |
| <b>Csf1</b>          | 2,61668261 | 0,0000000 | 0,00000000 |
| <b>Hr</b>            | 2,61854075 | 0,0000000 | 0,00000000 |
| <b>Sh3bgr</b>        | 2,62079418 | 0,0000000 | 0,00000000 |
| <b>Mill2</b>         | 2,6211226  | 0,0000000 | 0,00000000 |
| <b>Plaur</b>         | 2,62534089 | 0,0000000 | 0,00000000 |
| <b>Xdh</b>           | 2,63196356 | 0,0005367 | 0,00012914 |
| <b>2310043P16Rik</b> | 2,63631219 | 0,0000000 | 0,00000000 |
| <b>Adra1b</b>        | 2,63724654 | 0,0000682 | 0,00001398 |
| <b>Ddit4l</b>        | 2,64555788 | 0,0000000 | 0,00000000 |
| <b>Mrgprf</b>        | 2,65094652 | 0,0000277 | 0,00000532 |
| <b>Steap2</b>        | 2,65297483 | 0,0000000 | 0,00000000 |
| <b>Celf5</b>         | 2,66186335 | 0,0000006 | 0,00000010 |
| <b>Mylk3</b>         | 2,66227799 | 0,0000001 | 0,00000001 |
| <b>Stat2</b>         | 2,66470369 | 0,0000000 | 0,00000000 |
| <b>Des</b>           | 2,67028133 | 0,0000000 | 0,00000000 |
| <b>Mfge8</b>         | 2,67071057 | 0,0000000 | 0,00000000 |
| <b>Upk3bl</b>        | 2,67203286 | 0,0000258 | 0,00000491 |
| <b>Klf5</b>          | 2,67243112 | 0,0000000 | 0,00000000 |
| <b>Pcdh17</b>        | 2,68087951 | 0,0000000 | 0,00000000 |
| <b>Hspb6</b>         | 2,6816573  | 0,0000000 | 0,00000000 |
| <b>Tgm2</b>          | 2,68423918 | 0,0000000 | 0,00000000 |
| <b>Slc4a11</b>       | 2,68470435 | 0,0000000 | 0,00000000 |
| <b>Eno3</b>          | 2,68617141 | 0,0000000 | 0,00000000 |
| <b>Ccn1</b>          | 2,6867464  | 0,0000000 | 0,00000000 |
| <b>Id1</b>           | 2,68820925 | 0,0000000 | 0,00000000 |
| <b>Ndr4</b>          | 2,69002336 | 0,0000000 | 0,00000000 |
| <b>Cmpk2</b>         | 2,69016671 | 0,0000000 | 0,00000000 |
| <b>Fxd5</b>          | 2,69320162 | 0,0000000 | 0,00000000 |
| <b>Serpib6b</b>      | 2,69958146 | 0,0000000 | 0,00000000 |
| <b>Col19a1</b>       | 2,70023823 | 0,0000512 | 0,00001027 |
| <b>4732419C18Rik</b> | 2,70534363 | 0,0000000 | 0,00000000 |
| <b>Lctl</b>          | 2,71317874 | 0,0000000 | 0,00000000 |

|                      |            |           |            |
|----------------------|------------|-----------|------------|
| <b>Adora2a</b>       | 2,7166581  | 0,0000000 | 0,00000000 |
| <b>Col8a1</b>        | 2,71694374 | 0,0000216 | 0,00000406 |
| <b>Tfll1</b>         | 2,7175328  | 0,0000000 | 0,00000000 |
| <b>Arnt2</b>         | 2,71995518 | 0,0000000 | 0,00000000 |
| <b>Prph</b>          | 2,72278366 | 0,0000000 | 0,00000000 |
| <b>Lrrc75b</b>       | 2,72324145 | 0,0000000 | 0,00000000 |
| <b>Fos</b>           | 2,7234784  | 0,0000000 | 0,00000000 |
| <b>Scn1b</b>         | 2,726054   | 0,0000000 | 0,00000000 |
| <b>Lgr6</b>          | 2,72770603 | 0,0000000 | 0,00000000 |
| <b>Fat2</b>          | 2,73558174 | 0,0000199 | 0,00000371 |
| <b>Irgm1</b>         | 2,74061177 | 0,0000000 | 0,00000000 |
| <b>Pcdhb14</b>       | 2,74190372 | 0,0000000 | 0,00000000 |
| <b>G730013B05Rik</b> | 2,74597524 | 0,0000010 | 0,00000016 |
| <b>Arl4d</b>         | 2,75102501 | 0,0000000 | 0,00000000 |
| <b>Map1a</b>         | 2,75610389 | 0,0000000 | 0,00000000 |
| <b>Vdr</b>           | 2,75645869 | 0,0000000 | 0,00000000 |
| <b>Clea2</b>         | 2,76647098 | 0,0000171 | 0,00000317 |
| <b>Rgs4</b>          | 2,77288923 | 0,0000135 | 0,00000245 |
| <b>Ifi211</b>        | 2,774543   | 0,0000168 | 0,00000311 |
| <b>Pdgfa</b>         | 2,78031101 | 0,0000000 | 0,00000000 |
| <b>Frmd4b</b>        | 2,78428395 | 0,0000000 | 0,00000000 |
| <b>Apobr</b>         | 2,78648747 | 0,0000000 | 0,00000000 |
| <b>Rasa4</b>         | 2,79193483 | 0,0000000 | 0,00000000 |
| <b>Pdk2</b>          | 2,79438907 | 0,0000000 | 0,00000000 |
| <b>Mgst2</b>         | 2,79442181 | 0,0000001 | 0,00000001 |
| <b>Mpeg1</b>         | 2,79486592 | 0,0000155 | 0,00000285 |
| <b>Bmf</b>           | 2,79988967 | 0,0000000 | 0,00000000 |
| <b>Pik3r5</b>        | 2,80364001 | 0,0000136 | 0,00000249 |
| <b>Sucnr1</b>        | 2,80372169 | 0,0000011 | 0,00000017 |
| <b>Rims1</b>         | 2,8080645  | 0,0000001 | 0,00000001 |
| <b>Gm16010</b>       | 2,80839193 | 0,0000000 | 0,00000000 |
| <b>Serpine2</b>      | 2,81054055 | 0,0000000 | 0,00000000 |
| <b>Lhfp</b>          | 2,81469306 | 0,0000000 | 0,00000000 |
| <b>Galnt18</b>       | 2,8258757  | 0,0000110 | 0,00000199 |
| <b>Lgals3bp</b>      | 2,83611803 | 0,0000000 | 0,00000000 |
| <b>Pla1a</b>         | 2,83627058 | 0,0002634 | 0,00005955 |
| <b>Apod</b>          | 2,84094507 | 0,0000000 | 0,00000000 |
| <b>Gm43197</b>       | 2,84115383 | 0,0000000 | 0,00000000 |
| <b>Gm9887</b>        | 2,84580407 | 0,0000000 | 0,00000000 |
| <b>Itga3</b>         | 2,84623325 | 0,0000000 | 0,00000000 |
| <b>Mmp19</b>         | 2,85480223 | 0,0000001 | 0,00000001 |
| <b>Myh3</b>          | 2,85611947 | 0,0000000 | 0,00000000 |

|                      |            |           |            |
|----------------------|------------|-----------|------------|
| <b>Tfec</b>          | 2,85617318 | 0,0000000 | 0,00000000 |
| <b>Col18a1</b>       | 2,86894139 | 0,0000000 | 0,00000000 |
| <b>Fcgr4</b>         | 2,87398346 | 0,0000247 | 0,00000470 |
| <b>Hrct1</b>         | 2,88003486 | 0,0000000 | 0,00000000 |
| <b>Epha4</b>         | 2,88443935 | 0,0000000 | 0,00000000 |
| <b>My19</b>          | 2,88675844 | 0,0000000 | 0,00000000 |
| <b>Serp1b1b</b>      | 2,89143766 | 0,0000096 | 0,00000172 |
| <b>Cd248</b>         | 2,89733329 | 0,0000000 | 0,00000000 |
| <b>Pcdhb10</b>       | 2,89756587 | 0,0000000 | 0,00000000 |
| <b>Pld2</b>          | 2,90666799 | 0,0000000 | 0,00000000 |
| <b>Tmem106a</b>      | 2,91142346 | 0,0000000 | 0,00000000 |
| <b>Pcyt1b</b>        | 2,91716487 | 0,0000000 | 0,00000000 |
| <b>Aox4</b>          | 2,91739745 | 0,0000090 | 0,00000161 |
| <b>Dmpk</b>          | 2,91766442 | 0,0000000 | 0,00000000 |
| <b>Fbxo2</b>         | 2,92733254 | 0,0000000 | 0,00000000 |
| <b>Dnm3</b>          | 2,92755848 | 0,0000000 | 0,00000000 |
| <b>Rnf150</b>        | 2,92796854 | 0,0000000 | 0,00000000 |
| <b>Ptgs1</b>         | 2,93196816 | 0,0000000 | 0,00000000 |
| <b>6330403L08Rik</b> | 2,93970008 | 0,0000000 | 0,00000000 |
| <b>Smtnl1</b>        | 2,94932291 | 0,0000001 | 0,00000002 |
| <b>Uba7</b>          | 2,95255961 | 0,0000000 | 0,00000000 |
| <b>Lgals3</b>        | 2,95337322 | 0,0000000 | 0,00000000 |
| <b>Parp8</b>         | 2,95626286 | 0,0000000 | 0,00000000 |
| <b>Hfm1</b>          | 2,95637991 | 0,0000072 | 0,00000127 |
| <b>Trim25</b>        | 2,95668963 | 0,0000000 | 0,00000000 |
| <b>Folr1</b>         | 2,95762794 | 0,0000000 | 0,00000000 |
| <b>Me3</b>           | 2,96061451 | 0,0000000 | 0,00000000 |
| <b>Gm6556</b>        | 2,96163532 | 0,0000000 | 0,00000000 |
| <b>Kctd11</b>        | 2,96237918 | 0,0000000 | 0,00000000 |
| <b>Gm16325</b>       | 2,9660451  | 0,0000000 | 0,00000000 |
| <b>Slc41a2</b>       | 2,96988352 | 0,0000000 | 0,00000000 |
| <b>Gm15640</b>       | 2,97330382 | 0,0000000 | 0,00000000 |
| <b>Plscr2</b>        | 2,97767826 | 0,0000000 | 0,00000000 |
| <b>Nfam1</b>         | 2,98192788 | 0,0000060 | 0,00000104 |
| <b>Kcnb1</b>         | 2,98401664 | 0,0000000 | 0,00000000 |
| <b>Nmb</b>           | 2,99316162 | 0,0000000 | 0,00000000 |
| <b>Gata3</b>         | 2,99972023 | 0,0000000 | 0,00000000 |
| <b>Atp2a3</b>        | 3,00089568 | 0,0001105 | 0,00002336 |
| <b>H2-T23</b>        | 3,00370311 | 0,0000000 | 0,00000000 |
| <b>Thbs1</b>         | 3,01036692 | 0,0000000 | 0,00000000 |
| <b>Slc22a23</b>      | 3,01817581 | 0,0000000 | 0,00000000 |
| <b>Dchs2</b>         | 3,01866987 | 0,0000001 | 0,00000001 |

|                      |            |           |            |
|----------------------|------------|-----------|------------|
| <b>Irf5</b>          | 3,02464555 | 0,0000000 | 0,00000000 |
| <b>Cadm2</b>         | 3,02917133 | 0,0000000 | 0,00000000 |
| <b>Grb10</b>         | 3,03416195 | 0,0001295 | 0,00002772 |
| <b>Scn3b</b>         | 3,03452607 | 0,0000000 | 0,00000000 |
| <b>Gm20559</b>       | 3,04057018 | 0,0000000 | 0,00000000 |
| <b>Ccn3</b>          | 3,04323428 | 0,0000003 | 0,00000005 |
| <b>Fn1</b>           | 3,05774849 | 0,0000000 | 0,00000000 |
| <b>Myl1</b>          | 3,0589247  | 0,0000077 | 0,00000136 |
| <b>Spef11</b>        | 3,06813228 | 0,0000045 | 0,00000078 |
| <b>Gm7893</b>        | 3,07217263 | 0,0000034 | 0,00000058 |
| <b>Igdcc4</b>        | 3,0747407  | 0,0000000 | 0,00000000 |
| <b>Gm17501</b>       | 3,07691121 | 0,0000000 | 0,00000000 |
| <b>Tmem151a</b>      | 3,07881464 | 0,0000000 | 0,00000000 |
| <b>Nppb</b>          | 3,08042347 | 0,0000000 | 0,00000000 |
| <b>Slc27a1</b>       | 3,08262198 | 0,0000000 | 0,00000000 |
| <b>Sema3e</b>        | 3,08922703 | 0,0000000 | 0,00000000 |
| <b>S100a13</b>       | 3,09019088 | 0,0000000 | 0,00000000 |
| <b>Kcnk2</b>         | 3,09898397 | 0,0000000 | 0,00000000 |
| <b>Gm26797</b>       | 3,0994878  | 0,0000000 | 0,00000000 |
| <b>Sqor</b>          | 3,10195861 | 0,0001040 | 0,00002189 |
| <b>Psmb8</b>         | 3,11306855 | 0,0000039 | 0,00000066 |
| <b>Ppof1</b>         | 3,12521966 | 0,0000937 | 0,00001961 |
| <b>Acsbg1</b>        | 3,12928048 | 0,0000000 | 0,00000000 |
| <b>Prr5l</b>         | 3,13030633 | 0,0000000 | 0,00000000 |
| <b>2310008N11Rik</b> | 3,13439544 | 0,0000035 | 0,00000060 |
| <b>Akap12</b>        | 3,13518405 | 0,0000000 | 0,00000000 |
| <b>Ptn</b>           | 3,13738006 | 0,0000920 | 0,00001925 |
| <b>Postn</b>         | 3,14106776 | 0,0000000 | 0,00000000 |
| <b>Irag1</b>         | 3,1415434  | 0,0000000 | 0,00000000 |
| <b>Tnn</b>           | 3,1438506  | 0,0000032 | 0,00000053 |
| <b>Lama3</b>         | 3,14716797 | 0,0000051 | 0,00000087 |
| <b>Ace</b>           | 3,14960826 | 0,0000000 | 0,00000000 |
| <b>Hmcn2</b>         | 3,16079393 | 0,0000000 | 0,00000000 |
| <b>Gsta4</b>         | 3,16222915 | 0,0000000 | 0,00000000 |
| <b>Prkag3</b>        | 3,16557483 | 0,0000030 | 0,00000050 |
| <b>Edil3</b>         | 3,16708863 | 0,0000000 | 0,00000000 |
| <b>Oasl1</b>         | 3,16774858 | 0,0000000 | 0,00000000 |
| <b>1700007K13Rik</b> | 3,16961543 | 0,0000000 | 0,00000000 |
| <b>Acap1</b>         | 3,17139233 | 0,0000000 | 0,00000000 |
| <b>Lamb1</b>         | 3,17334302 | 0,0000000 | 0,00000000 |
| <b>Gm42765</b>       | 3,17641428 | 0,0000030 | 0,00000049 |
| <b>Ttc9</b>          | 3,17751903 | 0,0000000 | 0,00000000 |

|                      |            |           |            |
|----------------------|------------|-----------|------------|
| <b>Parp10</b>        | 3,18238426 | 0,0000000 | 0,00000000 |
| <b>Ifi47</b>         | 3,18641291 | 0,0000000 | 0,00000000 |
| <b>Slc17a8</b>       | 3,18870286 | 0,0000000 | 0,00000000 |
| <b>Cpz</b>           | 3,18938315 | 0,0000000 | 0,00000000 |
| <b>Tap2</b>          | 3,19531853 | 0,0000000 | 0,00000000 |
| <b>Adcyap1r1</b>     | 3,20002892 | 0,0000017 | 0,00000028 |
| <b>Samd9l</b>        | 3,20104391 | 0,0000000 | 0,00000000 |
| <b>Tapbp</b>         | 3,21262175 | 0,0000000 | 0,00000000 |
| <b>Sp9</b>           | 3,22000972 | 0,0000000 | 0,00000000 |
| <b>Ube2l6</b>        | 3,22039102 | 0,0000000 | 0,00000000 |
| <b>Tnfrsf22</b>      | 3,22608948 | 0,0000000 | 0,00000000 |
| <b>Helz2</b>         | 3,22944615 | 0,0000000 | 0,00000000 |
| <b>Lst1</b>          | 3,23074126 | 0,0000000 | 0,00000000 |
| <b>Myof</b>          | 3,23154279 | 0,0000000 | 0,00000000 |
| <b>Ier5l</b>         | 3,23234759 | 0,0000000 | 0,00000000 |
| <b>Sgms2</b>         | 3,23738494 | 0,0000000 | 0,00000000 |
| <b>4930417H01Rik</b> | 3,23788151 | 0,0000023 | 0,00000037 |
| <b>Tspan2</b>        | 3,24361907 | 0,0000000 | 0,00000000 |
| <b>S100a7a</b>       | 3,24870893 | 0,0000017 | 0,00000027 |
| <b>Grhl3</b>         | 3,24908847 | 0,0000000 | 0,00000000 |
| <b>Nmnat2</b>        | 3,25242712 | 0,0000000 | 0,00000000 |
| <b>0610012D04Rik</b> | 3,2607123  | 0,0000000 | 0,00000000 |
| <b>Bst2</b>          | 3,26199203 | 0,0000000 | 0,00000000 |
| <b>Lgals7</b>        | 3,26748407 | 0,0000003 | 0,00000004 |
| <b>Akap3</b>         | 3,27550562 | 0,0000024 | 0,00000039 |
| <b>S100a3</b>        | 3,27602685 | 0,0000000 | 0,00000001 |
| <b>Igf2</b>          | 3,2831933  | 0,0000014 | 0,00000022 |
| <b>Nlrp10</b>        | 3,28878592 | 0,0000000 | 0,00000000 |
| <b>Cdsn</b>          | 3,29376801 | 0,0000000 | 0,00000000 |
| <b>Corin</b>         | 3,29698906 | 0,0000000 | 0,00000000 |
| <b>Mdga1</b>         | 3,30003467 | 0,0000002 | 0,00000003 |
| <b>Padi3</b>         | 3,31027046 | 0,0000002 | 0,00000002 |
| <b>Ggt1</b>          | 3,31084894 | 0,0000000 | 0,00000000 |
| <b>Rnase4</b>        | 3,31375567 | 0,0000000 | 0,00000000 |
| <b>Rab11fip5</b>     | 3,31567627 | 0,0000000 | 0,00000000 |
| <b>Nlrc3</b>         | 3,32307612 | 0,0000000 | 0,00000000 |
| <b>Sertad4</b>       | 3,32531507 | 0,0000000 | 0,00000000 |
| <b>Notch1</b>        | 3,33034803 | 0,0000000 | 0,00000000 |
| <b>Irf9</b>          | 3,34330996 | 0,0000000 | 0,00000000 |
| <b>Nlrc5</b>         | 3,35012438 | 0,0000000 | 0,00000000 |
| <b>Serpina3n</b>     | 3,35235632 | 0,0000001 | 0,00000002 |
| <b>Fblim1</b>        | 3,35400629 | 0,0000000 | 0,00000000 |

|                      |            |           |            |
|----------------------|------------|-----------|------------|
| <b>Hcfc1r1</b>       | 3,36317482 | 0,0000000 | 0,00000000 |
| <b>Artn</b>          | 3,36941709 | 0,0000000 | 0,00000000 |
| <b>Lmod1</b>         | 3,37448008 | 0,0000000 | 0,00000000 |
| <b>Oasl2</b>         | 3,37455711 | 0,0000000 | 0,00000000 |
| <b>Pkhd1</b>         | 3,37586603 | 0,0000000 | 0,00000000 |
| <b>Ltbp1</b>         | 3,37988218 | 0,0000000 | 0,00000000 |
| <b>Usp17ld</b>       | 3,38871853 | 0,0000364 | 0,00000712 |
| <b>Cav1</b>          | 3,39093826 | 0,0000000 | 0,00000000 |
| <b>Kcnh2</b>         | 3,39353226 | 0,0000000 | 0,00000000 |
| <b>Palld</b>         | 3,4015898  | 0,0000000 | 0,00000000 |
| <b>Ccn2</b>          | 3,4068118  | 0,0000000 | 0,00000000 |
| <b>Cd34</b>          | 3,4096655  | 0,0000000 | 0,00000000 |
| <b>9330175E14Rik</b> | 3,41366524 | 0,0000000 | 0,00000000 |
| <b>Cd38</b>          | 3,42410259 | 0,0000000 | 0,00000000 |
| <b>Robo3</b>         | 3,42821319 | 0,0000000 | 0,00000000 |
| <b>Hspa1b</b>        | 3,42889793 | 0,0000000 | 0,00000000 |
| <b>Apobec1</b>       | 3,43189033 | 0,0000000 | 0,00000000 |
| <b>Atp1b2</b>        | 3,44205057 | 0,0000000 | 0,00000000 |
| <b>Gsta3</b>         | 3,44521772 | 0,0000000 | 0,00000000 |
| <b>C1s1</b>          | 3,4540066  | 0,0000000 | 0,00000000 |
| <b>Slc16a11</b>      | 3,46297201 | 0,0000000 | 0,00000000 |
| <b>Adh7</b>          | 3,4636076  | 0,0000000 | 0,00000000 |
| <b>Galnt15</b>       | 3,46470117 | 0,0000007 | 0,00000011 |
| <b>Plk2</b>          | 3,46974525 | 0,0000000 | 0,00000000 |
| <b>Sifn8</b>         | 3,47423988 | 0,0000269 | 0,00000514 |
| <b>Dhx58</b>         | 3,47719225 | 0,0000000 | 0,00000000 |
| <b>Pramel19</b>      | 3,47847877 | 0,0000269 | 0,00000515 |
| <b>Btg2</b>          | 3,47975584 | 0,0000000 | 0,00000000 |
| <b>4930461G14Rik</b> | 3,48274365 | 0,0000007 | 0,00000011 |
| <b>Ak1</b>           | 3,48732787 | 0,0000000 | 0,00000000 |
| <b>Trim34a</b>       | 3,4927983  | 0,0000000 | 0,00000000 |
| <b>Tmprss11f</b>     | 3,50184159 | 0,0000000 | 0,00000000 |
| <b>Pdgfb</b>         | 3,50539838 | 0,0000000 | 0,00000000 |
| <b>Foxn1</b>         | 3,51201868 | 0,0000218 | 0,00000411 |
| <b>Ccdc180</b>       | 3,51537322 | 0,0000006 | 0,00000009 |
| <b>Zbp1</b>          | 3,52171611 | 0,0000005 | 0,00000008 |
| <b>Serpib1a</b>      | 3,53136119 | 0,0000000 | 0,00000000 |
| <b>Lif</b>           | 3,53286167 | 0,0000000 | 0,00000000 |
| <b>Il12rb1</b>       | 3,54547355 | 0,0000000 | 0,00000000 |
| <b>Gm15767</b>       | 3,54571007 | 0,0000006 | 0,00000009 |
| <b>Ldb3</b>          | 3,5474811  | 0,0000000 | 0,00000000 |
| <b>Spn</b>           | 3,5505323  | 0,0000000 | 0,00000000 |

|                 |            |           |            |
|-----------------|------------|-----------|------------|
| <b>Ppm1e</b>    | 3,55147322 | 0,0000000 | 0,00000000 |
| <b>Nupr1</b>    | 3,5541424  | 0,0000000 | 0,00000000 |
| <b>Rin1</b>     | 3,55563316 | 0,0000000 | 0,00000000 |
| <b>Gm15228</b>  | 3,55670617 | 0,0000005 | 0,00000008 |
| <b>Trim12a</b>  | 3,56163454 | 0,0000000 | 0,00000000 |
| <b>Cst3</b>     | 3,56469586 | 0,0000000 | 0,00000000 |
| <b>Nckap5</b>   | 3,57196083 | 0,0000000 | 0,00000000 |
| <b>Gdpd2</b>    | 3,57284597 | 0,0000000 | 0,00000000 |
| <b>Rnf213</b>   | 3,57737315 | 0,0000000 | 0,00000000 |
| <b>Col10a1</b>  | 3,58000396 | 0,0000000 | 0,00000000 |
| <b>Tnnt2</b>    | 3,58068119 | 0,0000000 | 0,00000000 |
| <b>Efhd1</b>    | 3,59333022 | 0,0000000 | 0,00000000 |
| <b>Usp17la</b>  | 3,61261257 | 0,0000004 | 0,00000006 |
| <b>Tnxb</b>     | 3,61834307 | 0,0000000 | 0,00000000 |
| <b>Ccdc9b</b>   | 3,62355495 | 0,0000000 | 0,00000000 |
| <b>Nqo1</b>     | 3,63321988 | 0,0000000 | 0,00000000 |
| <b>Gm2065</b>   | 3,63437788 | 0,0000000 | 0,00000000 |
| <b>Ptpn5</b>    | 3,65695135 | 0,0000003 | 0,00000005 |
| <b>Plekha6</b>  | 3,66769677 | 0,0000000 | 0,00000000 |
| <b>Itga8</b>    | 3,67772269 | 0,0000000 | 0,00000000 |
| <b>Nell2</b>    | 3,68820435 | 0,0000001 | 0,00000002 |
| <b>Cobl</b>     | 3,69733617 | 0,0000003 | 0,00000004 |
| <b>Ifit1bl2</b> | 3,7428771  | 0,0000102 | 0,00000184 |
| <b>Cfap70</b>   | 3,74966521 | 0,0000000 | 0,00000000 |
| <b>Ifi35</b>    | 3,76451817 | 0,0000000 | 0,00000000 |
| <b>Serpib9</b>  | 3,77137219 | 0,0000000 | 0,00000000 |
| <b>Parp12</b>   | 3,79995505 | 0,0000000 | 0,00000000 |
| <b>Parp9</b>    | 3,8046578  | 0,0000000 | 0,00000000 |
| <b>H2-K1</b>    | 3,81858347 | 0,0000000 | 0,00000000 |
| <b>Lrig1</b>    | 3,82589172 | 0,0000000 | 0,00000000 |
| <b>Tap1</b>     | 3,83030603 | 0,0000000 | 0,00000000 |
| <b>Fbn1</b>     | 3,85114136 | 0,0000064 | 0,00000112 |
| <b>Stat1</b>    | 3,85927604 | 0,0000000 | 0,00000000 |
| <b>Prl2c5</b>   | 3,87047593 | 0,0000000 | 0,00000000 |
| <b>Iqsec3</b>   | 3,87331414 | 0,0000060 | 0,00000105 |
| <b>Tmem40</b>   | 3,87979958 | 0,0000000 | 0,00000000 |
| <b>Prkg2</b>    | 3,88275792 | 0,0000000 | 0,00000000 |
| <b>Wnt9a</b>    | 3,8900451  | 0,0000000 | 0,00000001 |
| <b>Gpr176</b>   | 3,8923745  | 0,0000000 | 0,00000000 |
| <b>Krt7</b>     | 3,90427006 | 0,0000054 | 0,00000094 |
| <b>Ifi27</b>    | 3,91227526 | 0,0000000 | 0,00000000 |
| <b>Timp4</b>    | 3,91948685 | 0,0000000 | 0,00000000 |

|                 |            |           |            |
|-----------------|------------|-----------|------------|
| <b>Tgtp2</b>    | 3,92772311 | 0,0000001 | 0,00000001 |
| <b>Fas</b>      | 3,94091531 | 0,0000001 | 0,00000001 |
| <b>Egr1</b>     | 3,9528833  | 0,0000000 | 0,00000000 |
| <b>Hspb1</b>    | 3,95617505 | 0,0000000 | 0,00000000 |
| <b>Rsad2</b>    | 3,95763586 | 0,0000000 | 0,00000000 |
| <b>Usp17le</b>  | 3,97058788 | 0,0000041 | 0,00000070 |
| <b>Synpo2</b>   | 3,97235165 | 0,0000000 | 0,00000000 |
| <b>Oas1b</b>    | 3,97275948 | 0,0000000 | 0,00000000 |
| <b>Ndrp2</b>    | 3,97773921 | 0,0000000 | 0,00000000 |
| <b>Actg2</b>    | 3,99734185 | 0,0000000 | 0,00000000 |
| <b>Prl2c2</b>   | 4,00509822 | 0,0000000 | 0,00000000 |
| <b>Kitl</b>     | 4,03355247 | 0,0000000 | 0,00000000 |
| <b>Otog</b>     | 4,05628075 | 0,0000000 | 0,00000000 |
| <b>Car5b</b>    | 4,06098315 | 0,0000000 | 0,00000000 |
| <b>Ifih1</b>    | 4,06403621 | 0,0000000 | 0,00000000 |
| <b>Pgf</b>      | 4,10457395 | 0,0000000 | 0,00000000 |
| <b>Tmem179</b>  | 4,11046593 | 0,0000000 | 0,00000000 |
| <b>Vgf</b>      | 4,13779807 | 0,0000000 | 0,00000000 |
| <b>Klhdc8a</b>  | 4,14273464 | 0,0000000 | 0,00000000 |
| <b>Plb1</b>     | 4,15780134 | 0,0000000 | 0,00000000 |
| <b>Gm20658</b>  | 4,15908247 | 0,0000000 | 0,00000000 |
| <b>Fbln2</b>    | 4,1713756  | 0,0000000 | 0,00000000 |
| <b>Eda2r</b>    | 4,19516565 | 0,0000000 | 0,00000000 |
| <b>Serping1</b> | 4,20782289 | 0,0000000 | 0,00000000 |
| <b>Chrn1</b>    | 4,20843519 | 0,0000000 | 0,00000000 |
| <b>Vat1l</b>    | 4,21854713 | 0,0000000 | 0,00000000 |
| <b>Gm40038</b>  | 4,23431821 | 0,0000000 | 0,00000000 |
| <b>Mx2</b>      | 4,24995465 | 0,0000000 | 0,00000000 |
| <b>Axl</b>      | 4,30423295 | 0,0000000 | 0,00000000 |
| <b>Slit1</b>    | 4,30747501 | 0,0000000 | 0,00000000 |
| <b>Phf11d</b>   | 4,32081259 | 0,0000010 | 0,00000015 |
| <b>Ifit3b</b>   | 4,3446813  | 0,0000000 | 0,00000000 |
| <b>Sp100</b>    | 4,34905847 | 0,0000000 | 0,00000000 |
| <b>Ecm1</b>     | 4,35611429 | 0,0000000 | 0,00000000 |
| <b>Ifit3</b>    | 4,42112797 | 0,0000000 | 0,00000000 |
| <b>Trim12c</b>  | 4,42254757 | 0,0000000 | 0,00000000 |
| <b>Parp14</b>   | 4,43081677 | 0,0000000 | 0,00000000 |
| <b>Trim30d</b>  | 4,44049241 | 0,0000006 | 0,00000009 |
| <b>Marchf10</b> | 4,45455384 | 0,0000000 | 0,00000000 |
| <b>Ifi44</b>    | 4,45650693 | 0,0000005 | 0,00000008 |
| <b>Gbp2</b>     | 4,45668972 | 0,0000000 | 0,00000000 |
| <b>Oas1a</b>    | 4,46174809 | 0,0000000 | 0,00000000 |



|                      |            |           |            |
|----------------------|------------|-----------|------------|
| <b>Cacna1a</b>       | 4,47916432 | 0,0000000 | 0,00000000 |
| <b>Uroc1</b>         | 4,48634371 | 0,0000000 | 0,00000000 |
| <b>Epha2</b>         | 4,49689807 | 0,0000000 | 0,00000000 |
| <b>Ptpn7</b>         | 4,49824623 | 0,0000005 | 0,00000007 |
| <b>Ifit1</b>         | 4,51355811 | 0,0000000 | 0,00000000 |
| <b>S100a4</b>        | 4,54102047 | 0,0000000 | 0,00000000 |
| <b>Slc18a1</b>       | 4,57379479 | 0,0000000 | 0,00000000 |
| <b>Clu</b>           | 4,60528406 | 0,0000000 | 0,00000000 |
| <b>Igfbp7</b>        | 4,61250747 | 0,0000000 | 0,00000000 |
| <b>Lrrc15</b>        | 4,62823665 | 0,0000000 | 0,00000000 |
| <b>Isg20</b>         | 4,6850056  | 0,0000000 | 0,00000000 |
| <b>Gbp7</b>          | 4,70158864 | 0,0000000 | 0,00000000 |
| <b>Dglucy</b>        | 4,70940852 | 0,0000000 | 0,00000000 |
| <b>Gm19705</b>       | 4,72903606 | 0,0000000 | 0,00000000 |
| <b>Dysf</b>          | 4,75361531 | 0,0000000 | 0,00000000 |
| <b>Ces2e</b>         | 4,75536694 | 0,0000002 | 0,00000002 |
| <b>Pkp3</b>          | 4,77934965 | 0,0000000 | 0,00000000 |
| <b>Col6a1</b>        | 4,80958225 | 0,0000000 | 0,00000000 |
| <b>Ifitm3</b>        | 4,816943   | 0,0000000 | 0,00000000 |
| <b>Oas3</b>          | 4,83072373 | 0,0000000 | 0,00000000 |
| <b>Ntn4</b>          | 4,84610051 | 0,0000000 | 0,00000000 |
| <b>Cd80</b>          | 4,87441879 | 0,0000000 | 0,00000000 |
| <b>Ddx60</b>         | 4,89702697 | 0,0000000 | 0,00000000 |
| <b>Cemip</b>         | 4,95054383 | 0,0000000 | 0,00000000 |
| <b>Pcdh12</b>        | 4,96863415 | 0,0000000 | 0,00000000 |
| <b>Oas1g</b>         | 4,9741035  | 0,0000000 | 0,00000000 |
| <b>Prss23</b>        | 4,97645104 | 0,0000000 | 0,00000000 |
| <b>Ddx58</b>         | 5,06649918 | 0,0000000 | 0,00000000 |
| <b>Dnase1l3</b>      | 5,11913562 | 0,0000000 | 0,00000000 |
| <b>Syn2</b>          | 5,19375074 | 0,0000000 | 0,00000000 |
| <b>Wincr1</b>        | 5,19743476 | 0,0000000 | 0,00000000 |
| <b>Ifi204</b>        | 5,19934001 | 0,0000000 | 0,00000000 |
| <b>Gbp3</b>          | 5,27289901 | 0,0000000 | 0,00000000 |
| <b>S100a6</b>        | 5,31854963 | 0,0000000 | 0,00000000 |
| <b>Col1a1</b>        | 5,34757117 | 0,0000000 | 0,00000000 |
| <b>Slc6a12</b>       | 5,35676257 | 0,0000000 | 0,00000000 |
| <b>Hspb7</b>         | 5,38528418 | 0,0000000 | 0,00000000 |
| <b>Tgfb1</b>         | 5,39576872 | 0,0000000 | 0,00000000 |
| <b>9530053A07Rik</b> | 5,42628483 | 0,0000000 | 0,00000000 |
| <b>Serp1nb2</b>      | 5,43400334 | 0,0000000 | 0,00000000 |
| <b>Usp18</b>         | 5,52858295 | 0,0000000 | 0,00000000 |
| <b>Xaf1</b>          | 5,74293178 | 0,0000000 | 0,00000000 |

|                 |            |           |            |
|-----------------|------------|-----------|------------|
| <b>Trim30a</b>  | 5,82596206 | 0,0000000 | 0,00000000 |
| <b>Folr2</b>    | 5,86887308 | 0,0000000 | 0,00000000 |
| <b>Irf7</b>     | 5,90694971 | 0,0000000 | 0,00000000 |
| <b>Ccdc80</b>   | 5,9929708  | 0,0000000 | 0,00000000 |
| <b>Irgm2</b>    | 6,04934234 | 0,0000000 | 0,00000000 |
| <b>Rtp4</b>     | 6,0891282  | 0,0000000 | 0,00000000 |
| <b>Oas2</b>     | 6,12990547 | 0,0000000 | 0,00000000 |
| <b>Fgd3</b>     | 6,3064106  | 0,0000000 | 0,00000000 |
| <b>Serpine1</b> | 6,32353614 | 0,0000000 | 0,00000000 |
| <b>Isg15</b>    | 6,4068244  | 0,0000000 | 0,00000000 |
| <b>Igtp</b>     | 6,67842264 | 0,0000000 | 0,00000000 |
| <b>Il11</b>     | 6,70096026 | 0,0000000 | 0,00000000 |
| <b>Sncg</b>     | 7,35680016 | 0,0000000 | 0,00000000 |
| <b>Tnfrsf23</b> | 7,4369703  | 0,0000000 | 0,00000000 |
| <b>Apol9a</b>   | 7,52919892 | 0,0000000 | 0,00000000 |
| <b>Serpib9b</b> | 7,61596295 | 0,0000000 | 0,00000000 |
| <b>Apol9b</b>   | 7,87800091 | 0,0000000 | 0,00000000 |
| <b>Lamc2</b>    | 7,90218155 | 0,0000000 | 0,00000000 |

<sup>1</sup> MO4 cells exposed to 1 $\mu$ M CM-272 for 24 hours were subjected to RNA sequencing. Gene expression counts were processed using DESeq2 R-package to render normalized expression counts and report on log<sub>2</sub>-fold changes with corresponding *p*-values and *q*-values. Listed genes comply with following cut-offs: *p*-value <0.0005, *q*-value <0.002, and |log<sub>2</sub>-fold change| >1.

<sup>2</sup> log<sub>2</sub>-fold change represents CM-272 condition relative to vehicle condition.

**Table S2 – RNA sequencing of CM-272-treated MO4 cells *in vitro* - significantly changed gene sets. <sup>1</sup>**

| Gene set name                                                                  | # genes | NES     | FDR-value | p-value |
|--------------------------------------------------------------------------------|---------|---------|-----------|---------|
| <b>Epigenetic regulation of gene expression and protein stability</b>          |         |         |           |         |
| <b><i>Golgi to ER transport</i></b>                                            |         |         |           |         |
| REACTOME_GOLGI_TO_ER_RETROGRADE_TRANSPORT                                      | 125     | -1.9019 | 0.0025    | 0.0     |
| REACTOME_COPI_DEPENDENT_GOLGI_TO_ERRETROGRADE_TRAFFIC                          | 91      | -2.13   | 0.0001    | 0.0     |
| REACTOME_KINESINS                                                              | 53      | -2.2377 | 0.0       | 0.0     |
| REACTOME_MHC_CLASS_II_ANTIGEN_PRESENTATION                                     | 112     | -1.4152 | 0.0914    | 0.0     |
| REACTOME_INTRA_GOLGI_AND_RETROGRADE_GOLGI_TO_ER_TRAFFIC                        | 191     | -1.4671 | 0.0688    | 0.0     |
| REACTOME_FACTORS_INVOLVED_IN_MEGAKARYOCYTE_DEVELOPMENT_AND_PLATELET_PRODUCTION | 138     | -1.9897 | 0.0009    | 0.0     |
| REACTOME_RHO_GTPASES_ACTIVATE_IQGAPS                                           | 26      | -1.7509 | 0.0099    | 0.0     |
| <b><i>DNA modifications</i></b>                                                |         |         |           |         |
| REACTOME_DNA_METHYLATION                                                       | 27      | -2.4511 | 0.0       | 0.0     |
| REACTOME_POSITIVE_EPIGENETIC_REGULATION_OF_RRNA_EXPRESSION                     | 68      | -2.3641 | 0.0       | 0.0     |
| REACTOME_PRC2_METHYLATES_HISTONES_AND_DNA                                      | 35      | -2.5158 | 0.0       | 0.0     |
| REACTOME_EPIGENETIC_REGULATION_OF_GENE_EXPRESSION                              | 109     | -2.4318 | 0.0       | 0.0     |
| <b><i>Histone modifications</i></b>                                            |         |         |           |         |
| WP_HISTONE_MODIFICATIONS                                                       | 44      | -1.9623 | 0.0012    | 0.0     |
| REACTOME_PKMTS_METHYLATE_HISTONE_LYSINES                                       | 49      | -2.2776 | 0.0       | 0.0     |
| REACTOME_RMTS_METHYLATE_HISTONE_ARGININES                                      | 46      | -2.0037 | 0.0008    | 0.0     |
| REACTOME_CHROMATIN_MODIFYING_ENZYMES                                           | 230     | -2.0504 | 0.0004    | 0.0     |
| REACTOME_HATS_ACETYLATE_HISTONES                                               | 99      | -2.0788 | 0.0002    | 0.0     |
| REACTOME_HDACS_DEACETYLATE_HISTONES                                            | 51      | -2.1175 | 0.0001    | 0.0     |
| <b><i>mRNA processing</i></b>                                                  |         |         |           |         |
| REACTOME_PROCESSING_OF_CAPPED_INTRONLESS_PRE_MRNA                              | 28      | -2.1348 | 0.0001    | 0.0     |
| REACTOME_PROCESSING_OF_CAPPED_INTRONCONTAINING_PRE_MRNA                        | 237     | -2.8765 | 0.0       | 0.0     |
| REACTOME_MRNA_SPLICING                                                         | 187     | -2.585  | 0.0       | 0.0     |
| KEGG_SPLICEOSOME                                                               | 121     | -2.3184 | 0.0       | 0.0     |
| REACTOME_MRNA_SPLICING_MINOR_PATHWAY                                           | 52      | -1.9737 | 0.0011    | 0.0     |
| WP_MRNA_PROCESSING                                                             | 125     | -2.633  | 0.0       | 0.0     |
| REACTOME_RNA_POLYMERASE_II_TRANSCRIPTION_TERMINATION                           | 65      | -2.4017 | 0.0       | 0.0     |
| <b><i>Pyrimidine metabolism</i></b>                                            |         |         |           |         |
| KEGG_PYRIMIDINE_METABOLISM                                                     | 94      | -1.8542 | 0.0004    | 0.0     |
| WP_PYRIMIDINE_METABOLISM                                                       | 81      | -1.7382 | 0.0109    | 0.0     |
| <b><i>RNA degradation</i></b>                                                  |         |         |           |         |
| REACTOME_DEADENYLATION_OF_MRNA                                                 | 25      | -1.9513 | 0.0014    | 0.0     |

|                                                                        |     |         |        |     |
|------------------------------------------------------------------------|-----|---------|--------|-----|
| REACTOME_DEADENYLATION_DEPENDENT_MRNA_DECAY                            | 55  | -2.245  | 0.0    | 0.0 |
| KEGG_RNA_DEGRADATION                                                   | 56  | -1.8081 | 0.0064 | 0.0 |
| <i>Sumoylation of proteins</i>                                         |     |         |        |     |
| REACTOME_GLUCOSE_METABOLISM                                            | 89  | -1.4631 | 0.0702 | 0.0 |
| REACTOME_HCMV_LATE_EVENTS                                              | 68  | -2.3627 | 0.0    | 0.0 |
| REACTOME_SNRNP_ASSEMBLY                                                | 51  | -2.6013 | 0.0    | 0.0 |
| REACTOME_HIV_LIFE_CYCLE                                                | 141 | -1.932  | 0.0018 | 0.0 |
| REACTOME_TRANSCRIPTIONAL_REGULATION_BY_SMALL_RNAS                      | 67  | -2.5892 | 0.0    | 0.0 |
| REACTOME_INTERACTIONS_OF_VPR_WITH_HOST_CELLULAR_PROTEINS               | 34  | -2.3605 | 0.0    | 0.0 |
| REACTOME_EXPORT_OF_VIRAL_RIBONUCLEOPROTEINS_FROM_NUCLEUS               | 30  | -2.3538 | 0.0    | 0.0 |
| REACTOME_INTERACTIONS_OF_REV_WITH_HOST_CELLULAR_PROTEINS               | 35  | -2.4247 | 0.0    | 0.0 |
| REACTOME_HCMV_INFECTION                                                | 108 | -2.2718 | 0.0    | 0.0 |
| REACTOME_GLYCOLYSIS                                                    | 69  | -1.7334 | 0.0113 | 0.0 |
| REACTOME_TRNA_PROCESSING                                               | 107 | -2.0594 | 0.0003 | 0.0 |
| REACTOME_SUMOYLATION_OF_SUMOYLATION_PROTEINS                           | 33  | -2.4211 | 0.0    | 0.0 |
| REACTOME_TRANSPORT_OF_MATURE_MRNAS_DERIVED_FROM_INTRONLESS_TRANSCRIPTS | 41  | -2.4636 | 0.0    | 0.0 |
| REACTOME_TRNA_PROCESSING_IN_THE_NUCLEUS                                | 57  | -2.3999 | 0.0    | 0.0 |
| REACTOME_SUMOYLATION_OF_RNA_BINDING_PROTEINS                           | 44  | -2.3122 | 0.0    | 0.0 |
| REACTOME_SUMOYLATION_OF_DNA_DAMAGE_RESPONSE_AND_REPAIR_PROTEINS        | 73  | -2.131  | 0.0001 | 0.0 |
| REACTOME_POSTMITOTIC_NUCLEAR_PORE_COMPLEX_NPC_REFORMATION              | 26  | -2.369  | 0.0    | 0.0 |
| REACTOME_SUMOYLATION_OF_DNA_REPLICATION_PROTEINS                       | 44  | -2.5818 | 0.0    | 0.0 |
| REACTOME_REGULATION_OF_HSF1_MEDIATED_HEAT_SHOCK_RESPONSE               | 77  | -1.6503 | 0.0207 | 0.0 |
| REACTOME_VIRAL_MESSENGER_RNA_SYNTHESIS                                 | 42  | -2.2042 | 0.0    | 0.0 |
| REACTOME_NUCLEAR_PORE_COMPLEX_NPC_DISASSEMBLY                          | 34  | -2.5401 | 0.0    | 0.0 |
| REACTOME_SUMOYLATION                                                   | 169 | -2.0821 | 0.0002 | 0.0 |
| REACTOME_NUCLEAR_IMPORT_OF_REV_PROTEIN                                 | 32  | -2.4397 | 0.0    | 0.0 |
| REACTOME_TRANSPORT_OF_THE_SLBP_DEPENDENT_MATURE_MRNA                   | 34  | -2.4215 | 0.0    | 0.0 |
| REACTOME_NUCLEAR_ENVELOPE_BREAKDOWN                                    | 51  | -2.3189 | 0.0    | 0.0 |
| REACTOME_NS1_MEDIATED_EFFECTS_ON_HOST_PATHWAYS                         | 38  | -1.9847 | 0.0009 | 0.0 |
| REACTOME_HCMV_EARLY_EVENTS                                             | 87  | -2.4343 | 0.0    | 0.0 |
| REACTOME_SUMOYLATION_OF_UBIQUITINYLATED_PROTEINS                       | 37  | -2.126  | 0.0001 | 0.0 |
| REACTOME_GENE_SILENCING_BY_RNA                                         | 98  | -2.2526 | 0.0    | 0.0 |
| REACTOME_TRANSPORT_OF_MATURE_TRANSCRIPT_TO_CYTOPLASM                   | 80  | -2.6262 | 0.0    | 0.0 |
| REACTOME_SUMOYLATION_OF_CHROMATIN_ORGANIZATION_PROTEINS                | 55  | -2.3872 | 0.0    | 0.0 |

|                                                                      |    |         |     |     |
|----------------------------------------------------------------------|----|---------|-----|-----|
| REACTOME_REGULATION_OF_GLUCOKINASE_BY_GLUCOKINASE_REGULATORY_PROTEIN | 30 | -2.2865 | 0.0 | 0.0 |
|----------------------------------------------------------------------|----|---------|-----|-----|

### **Immune recognition and responses**

#### *Antigen presentation*

|                                                                                   |    |        |        |        |
|-----------------------------------------------------------------------------------|----|--------|--------|--------|
| KEGG_ANTIGEN_PROCESSING_AND_PRESENTATION                                          | 53 | 1.623  | 0.0339 | 0.0023 |
| REACTOME_ANTIGEN_PRESENTATION_FOLDING_ASSEMBLY_AND_PEPTIDE_LOADING_OF_CLASS_I_MHC | 21 | 1.6003 | 0.0408 | 0.0027 |

#### *Autoimmune signaling*

|                                 |    |        |        |        |
|---------------------------------|----|--------|--------|--------|
| KEGG_ALLOGRAFT_REJECTION        | 27 | 1.8458 | 0.0033 | 0.0    |
| KEGG_VIRAL_MYOCARDITIS          | 60 | 1.6186 | 0.0349 | 0.0    |
| WP_ALLOGRAFT_REJECTION          | 77 | 1.6921 | 0.0185 | 0.0011 |
| KEGG_TYPE_I_DIABETES_MELLITUS   | 33 | 1.743  | 0.0108 | 0.0    |
| KEGG_GRAFT_VERSUS_HOST_DISEASE  | 26 | 1.7866 | 0.0067 | 0.0    |
| KEGG_AUTOIMMUNE_THYROID_DISEASE | 31 | 1.8228 | 0.0041 | 0.0    |

#### *Complement system*

|                                                    |    |        |        |        |
|----------------------------------------------------|----|--------|--------|--------|
| REACTOME_COMPLEMENT_CASCADE                        | 58 | 1.6089 | 0.0375 | 0.0023 |
| REACTOME_FORMATION_OF_FIBRIN_CLOT_CLOTTING_CASCADE | 37 | 1.6206 | 0.0344 | 0.0025 |
| WP_COMPLEMENT_AND_COAGULATION_CASCADES             | 55 | 1.6055 | 0.0391 | 0.0012 |
| KEGG_COMPLEMENT_AND_COAGULATION_CASCADES           | 64 | 1.7139 | 0.0146 | 0.0    |
| WP_HUMAN_COMPLEMENT_SYSTEM                         | 89 | 1.8625 | 0.0022 | 0.0    |

#### *Inflammatory response*

|                                                    |     |        |        |        |
|----------------------------------------------------|-----|--------|--------|--------|
| REACTOME_INTERLEUKIN_10_SIGNALING                  | 42  | 1.9482 | 0.0002 | 0.0    |
| WP_CYTOKINES_AND_INFLAMMATORY_RESPONSE             | 26  | 1.7504 | 0.0105 | 0.0013 |
| KEGG_JAK_STAT_SIGNALING_PATHWAY                    | 138 | 1.5014 | 0.0926 | 0.0011 |
| WP_DEVELOPMENT_AND_HETEROGENEITY_OF_THE_ILC_FAMILY | 32  | 1.8309 | 0.0037 | 0.0    |
| KEGG_HEMATOPOIETIC_CELL_LINEAGE                    | 78  | 1.9497 | 0.0003 | 0.0    |
| KEGG_CYTOKINE_CYTOKINE_RECEPTOR_INTERACTION        | 231 | 1.7192 | 0.0136 | 0.0    |

#### *Interferon signaling*

|                                              |     |        |        |     |
|----------------------------------------------|-----|--------|--------|-----|
| WP_TYPE_II_INTERFERON_SIGNALING_IFNG         | 34  | 1.8623 | 0.0021 | 0.0 |
| WP_THE_HUMAN_IMMUNE_RESPONSE_TO_TUBERCULOSIS | 22  | 2.0883 | 0.0    | 0.0 |
| REACTOME_INTERFERON_GAMMA_SIGNALING          | 76  | 2.0867 | 0.0    | 0.0 |
| REACTOME_INTERFERON_ALPHA_BETA_SIGNALING     | 52  | 2.3095 | 0.0    | 0.0 |
| REACTOME_INTERFERON_SIGNALING                | 166 | 1.9177 | 0.0009 | 0.0 |

#### *Interleukin pathways*

|                                                     |     |        |        |        |
|-----------------------------------------------------|-----|--------|--------|--------|
| PID_IL12_2PATHWAY                                   | 61  | 1.6012 | 0.0406 | 0.0    |
| PID_IL27_PATHWAY                                    | 26  | 1.5955 | 0.0418 | 0.0    |
| REACTOME_INTERLEUKIN_4_AND_INTERLEUKIN_13_SIGNALING | 109 | 1.8759 | 0.0021 | 0.0    |
| PID_IL23_PATHWAY                                    | 37  | 1.7323 | 0.0112 | 0.0039 |

#### *TGF- $\beta$ signaling*

|                                                                    |    |        |        |        |
|--------------------------------------------------------------------|----|--------|--------|--------|
| WP_HYPOTHESIZED_PATHWAYS_IN_PATHOGENESIS_OF_CARDIOVASCULAR_DISEASE | 24 | 1.7069 | 0.0153 | 0.0013 |
| WP_TGFBETA_RECEPTOR_SIGNALING                                      | 54 | 1.6506 | 0.0264 | 0.0    |

|                                                       |    |        |        |     |
|-------------------------------------------------------|----|--------|--------|-----|
| WP_TGFBETA_RECEPTOR_SIGNALLING_IN_SKELETAL_DYSPLASIAS | 58 | 1.6447 | 0.0276 | 0.0 |
|-------------------------------------------------------|----|--------|--------|-----|

***Toll-like receptor signaling***

|                                                                          |     |        |        |        |
|--------------------------------------------------------------------------|-----|--------|--------|--------|
| KEGG_TOLL_LIKE_RECEPTOR_SIGNALING_PATHWAY                                | 88  | 1.5516 | 0.0661 | 0.0022 |
| WP_REGULATION_OF_TOLLLIKE_RECEPTOR_SIGNALING_PATHWAY                     | 128 | 1.5392 | 0.0716 | 0.0    |
| WP_TOLLLIKE_RECEPTOR_SIGNALING_PATHWAY                                   | 90  | 1.5144 | 0.084  | 0.0022 |
| REACTOME_TRAF6_MEDIATED_IRF7_ACTIVATION                                  | 18  | 1.6801 | 0.0209 | 0.0027 |
| WP_TOLLLIKE_RECEPTOR_SIGNALING_RELATED_TO_MYD88                          | 31  | 1.6168 | 0.0349 | 0.0025 |
| WP_SARS_CORONAVIRUS_AND_INNATE_IMMUNITY                                  | 20  | 1.7346 | 0.0109 | 0.0027 |
| WP_MIRNAS_INVOLVEMENT_IN_THE_IMMUNE_RESPONSE_IN_SEPSIS                   | 60  | 1.5995 | 0.0406 | 0.0023 |
| WP_HOSTPATHOGEN_INTERACTION_OF_HUMAN_CORONA_VIRUSES_INTERFERON_INDUCTION | 33  | 1.7904 | 0.0065 | 0.0    |
| WP_TYPE_I_INTERFERON_INDUCTION_AND_SIGNALING_DURING_SARSCOV2_INFECTION   | 29  | 1.7061 | 0.0153 | 0.0026 |
| WP_FIBRIN_COMPLEMENT_RECEPTOR_3_SIGNALING_PATHWAY                        | 41  | 1.6355 | 0.0293 | 0.0012 |

***Carcinogenesis-related pathways***

***Cell cycle***

|                                                                                                                                      |     |         |        |     |
|--------------------------------------------------------------------------------------------------------------------------------------|-----|---------|--------|-----|
| REACTOME_RHO_GTPASE_EFFECTORS                                                                                                        | 274 | -2.6005 | 0.0    | 0.0 |
| REACTOME_CELL_CYCLE_CHECKPOINTS                                                                                                      | 265 | -3.1369 | 0.0    | 0.0 |
| REACTOME_ANCHORING_OF_THE_BASAL_BODY_TO_THE_PLASMA_MEMBRANE                                                                          | 96  | -2.4938 | 0.0    | 0.0 |
| REACTOME_RECRUITMENT_OF_NUMA_TO_MITOTIC_CENTROSOMES                                                                                  | 87  | -2.4848 | 0.0    | 0.0 |
| REACTOME_INHIBITION_OF_DNA_RECOMBINATION_AT_TELOMERE                                                                                 | 38  | -2.1621 | 0.0001 | 0.0 |
| REACTOME_INHIBITION_OF_THE_PROTEOLYTIC_ACTIVITY_OF_APC_C_REQUIRED_FOR_THE_ONSET_OF_ANAPHASE_BY_MITOTIC_SPINDLE_CHECKPOINT_COMPONENTS | 21  | -2.0011 | 0.0008 | 0.0 |
| REACTOME_CYCLIN_A_B1_B2_ASSOCIATED_EVENTS_DURING_G2_M_TRANSITION                                                                     | 25  | -2.6381 | 0.0    | 0.0 |
| REACTOME_RUNX1_REGULATES_GENES_INVOLVED_IN_MEGAKARYOCYTE_DIFFERENTIATION_AND_PLATELET_FUNCTION                                       | 59  | -1.6988 | 0.0145 | 0.0 |
| PID_E2F_PATHWAY                                                                                                                      | 72  | -2.2036 | 0.0    | 0.0 |
| REACTOME_INITIATION_OF_NUCLEAR_ENVELOPE_REFORMATION                                                                                  | 19  | -2.069  | 0.0003 | 0.0 |
| REACTOME_FORMATION_OF_THE_BETA_CATENIN_TCF_TRANSACTIVATING_COMPLEX                                                                   | 53  | -2.2427 | 0.0    | 0.0 |
| WP_DNA_IRDOUBLE_STRAND_BREAKS_DSBS_AND_CELLULAR_RESPONSE_VIA_ATM                                                                     | 55  | -2.5294 | 0.0    | 0.0 |
| REACTOME_TELOMERE_C_STRAND_LAGGING_STRAND_SYNTHESIS                                                                                  | 33  | -2.6074 | 0.0    | 0.0 |
| PID_ATM_PATHWAY                                                                                                                      | 34  | -2.2806 | 0.0    | 0.0 |
| REACTOME_REPRODUCTION                                                                                                                | 104 | -2.3235 | 0.0    | 0.0 |
| REACTOME_ORGANELLE_BIOGENESIS_AND_MAINTENANCE                                                                                        | 288 | -1.7125 | 0.0132 | 0.0 |

|                                                                                                               |     |         |        |        |
|---------------------------------------------------------------------------------------------------------------|-----|---------|--------|--------|
| REACTOME_SENESCENCE_ASSOCIATED_SECRETORY PHENOTYPE SASP                                                       | 72  | -1.9527 | 0.0014 | 0.0    |
| REACTOME_POLYMERASE_SWITCHING_ON_THE_C STRAND OF THE TELOMERE                                                 | 25  | -2.5368 | 0.0    | 0.0    |
| REACTOME_B_WICH_COMPLEX_POSITIVELY_REGULATES RRNA EXPRESSION                                                  | 53  | -2.2701 | 0.0    | 0.0    |
| REACTOME_MITOTIC_G2_G2_M PHASES                                                                               | 191 | -2.4314 | 0.0    | 0.0    |
| REACTOME_ACTIVATION_OF_ANTERIOR_HOX_GENES_IN_HINDBRAIN_DEVELOPMENT_DURING_EARLY EMBRYOGENESIS                 | 84  | -2.2113 | 0.0    | 0.0    |
| REACTOME_CHROMOSOME_MAINTENANCE                                                                               | 109 | -3.1124 | 0.0    | 0.0    |
| REACTOME_TELOMERE_MAINTENANCE                                                                                 | 83  | -2.8198 | 0.0    | 0.0    |
| PID_FANCONI_PATHWAY                                                                                           | 46  | -2.7261 | 0.0    | 0.0    |
| REACTOME_TRANSLESION_SYNTHESIS_BY_Y_FAMILY DNA POLYMERASES_BYPASSES_LESIONS_ON DNA TEMPLATE                   | 39  | -1.7728 | 0.0083 | 0.0    |
| REACTOME_ERCC6_CSB_AND_EHMT2_G9A_POSITIVELY REGULATE RRNA EXPRESSION                                          | 38  | -2.4181 | 0.0    | 0.0    |
| REACTOME_MITOTIC_PROPHASE                                                                                     | 102 | -2.6825 | 0.0    | 0.0    |
| REACTOME_REGULATION_OF_TP53_ACTIVITY                                                                          | 158 | -2.0434 | 0.0004 | 0.0    |
| WP_RETINOBLASTOMA_GENE_IN_CANCER                                                                              | 86  | -3.1195 | 0.0    | 0.0    |
| REACTOME_CYCLIN_A_CDK2_ASSOCIATED_EVENTS AT S PHASE ENTRY                                                     | 85  | -1.5635 | 0.0371 | 0.0    |
| REACTOME_G2_M DNA DAMAGE CHECKPOINT                                                                           | 70  | -2.8504 | 0.0    | 0.0    |
| REACTOME_NEGATIVE_EPIGENETIC_REGULATION OF RRNA EXPRESSION                                                    | 70  | -2.3514 | 0.0    | 0.0    |
| REACTOME_RECRUITMENT_OF_MITOTIC_CENTROSOME PROTEINS AND COMPLEXES                                             | 78  | -2.496  | 0.0    | 0.0    |
| REACTOME_CONVERSION_FROM_APC_C_CDC20_TO APC C CDH1 IN LATE ANAPHASE                                           | 20  | -1.8448 | 0.0044 | 0.0042 |
| REACTOME_TERMINATION_OF_TRANSLESION_DNA SYNTHESIS                                                             | 32  | -1.7089 | 0.0134 | 0.0    |
| PID_ATR_PATHWAY                                                                                               | 39  | -2.8735 | 0.0    | 0.0    |
| REACTOME_TRANSCRIPTION_OF_E2F_TARGETS_UNDER NEGATIVE CONTROL BY P107_RBL1_AND_P130_RBL2 IN COMPLEX WITH HDAC1 | 16  | -2.3997 | 0.0    | 0.0    |
| KEGG_OOCYTE_MEIOSIS                                                                                           | 107 | -2.0208 | 0.0006 | 0.0    |
| REACTOME_SEPARATION_OF_SISTER_CHROMATIDS                                                                      | 183 | -2.8433 | 0.0    | 0.0    |
| REACTOME_REGULATION_OF_TP53_ACTIVITY_THROUGH PHOSPHORYLATION                                                  | 91  | -2.2074 | 0.0    | 0.0    |
| REACTOME_LAGGING_STRAND_SYNTHESIS                                                                             | 20  | -2.6226 | 0.0    | 0.0    |
| REACTOME_AURKA_ACTIVATION_BY_TPX2                                                                             | 71  | -2.6781 | 0.0    | 0.0    |
| PID_PLK1_PATHWAY                                                                                              | 46  | -2.9439 | 0.0    | 0.0    |
| REACTOME_PHOSPHORYLATION_OF_THE_APC_C                                                                         | 20  | -1.9603 | 0.0012 | 0.0    |
| REACTOME_SWITCHING_OF_ORIGINS_TO_A_POST REPLICATIVE STATE                                                     | 91  | -2.054  | 0.0004 | 0.0    |
| WP_DNA_IRDAMAGE_AND_CELLULAR_RESPONSE VIA ATR                                                                 | 80  | -2.9654 | 0.0    | 0.0    |
| REACTOME_G1_S_SPECIFIC_TRANSCRIPTION                                                                          | 28  | -2.7196 | 0.0    | 0.0    |
| REACTOME_DUAL_INCISION_IN_GG_NER                                                                              | 40  | -2.3625 | 0.0    | 0.0    |
| REACTOME_PROCESSIVE_SYNTHESIS_ON_THE_C_STRAND OF THE TELOMERE                                                 | 18  | -2.1099 | 0.0001 | 0.0    |

|                                                                                                 |     |         |        |     |
|-------------------------------------------------------------------------------------------------|-----|---------|--------|-----|
| REACTOME_ACTIVATION_OF_ATR_IN_RESPONSE_TO_REPLICATION_STRESS                                    | 37  | -2.8539 | 0.0    | 0.0 |
| KEGG_DNA_REPLICATION                                                                            | 35  | -2.9181 | 0.0    | 0.0 |
| REACTOME_DUAL_INCISION_IN_TC_NER                                                                | 63  | -2.0551 | 0.0004 | 0.0 |
| REACTOME_E2F_MEDIATED_REGULATION_OF_DNA_REPLICATION                                             | 22  | -2.2966 | 0.0    | 0.0 |
| REACTOME_TRANSCRIPTION_OF_E2F_TARGETS_UNDER_NEGATIVE_CONTROL_BY_DREAM_COMPLEX                   | 19  | -2.3834 | 0.0    | 0.0 |
| KEGG_PROGESTERONE_MEDIATED_OOCYTE_MATURATION                                                    | 83  | -1.9003 | 0.0025 | 0.0 |
| REACTOME_TRANSLESION_SYNTHESIS_BY_POLK                                                          | 17  | -2.0197 | 0.0006 | 0.0 |
| REACTOME_TRANSLESION_SYNTHESIS_BY_POLH                                                          | 19  | -2.1091 | 0.0001 | 0.0 |
| REACTOME_RNA_POLYMERASE_I_TRANSCRIPTION                                                         | 72  | -2.2326 | 0.0    | 0.0 |
| WP_G1_TO_S_CELL_CYCLE_CONTROL                                                                   | 64  | -2.4889 | 0.0    | 0.0 |
| REACTOME_RHO_GTPASES_ACTIVATE_FORMINS                                                           | 132 | -3.0313 | 0.0    | 0.0 |
| REACTOME_RESOLUTION_OF_AP_SITES_VIA_THE_MULTIPLE_NUCLEOTIDE_PATCH_REPLACEMENT_PATHWAY           | 24  | -2.5118 | 0.0    | 0.0 |
| REACTOME_DISEASES_OF_MITOTIC_CELL_CYCLE                                                         | 36  | -1.7759 | 0.0082 | 0.0 |
| REACTOME_HDR_THROUGH_SINGLE_STRAND_ANNEALING_SSA                                                | 37  | -2.5529 | 0.0    | 0.0 |
| WP_DNA_MISMATCH_REPAIR                                                                          | 23  | -2.5945 | 0.0    | 0.0 |
| REACTOME_RESOLUTION_OF_D_LOOP_STRUCTURES                                                        | 33  | -2.4205 | 0.0    | 0.0 |
| REACTOME_M_PHASE                                                                                | 364 | -2.9423 | 0.0    | 0.0 |
| REACTOME_DNA_DAMAGE_TELOMERE_STRESS_INDUCED_SENESCENCE                                          | 50  | -2.3346 | 0.0    | 0.0 |
| REACTOME_EXTENSION_OF_TELOMERES                                                                 | 50  | -2.7375 | 0.0    | 0.0 |
| REACTOME_G0_AND_EARLY_G1                                                                        | 27  | -2.6346 | 0.0    | 0.0 |
| REACTOME_PROCESSIVE_SYNTHESIS_ON_THE_LAGGING_STRAND                                             | 15  | -2.4115 | 0.0    | 0.0 |
| REACTOME_RESOLUTION_OF_ABASIC_SITES_AP_SITES                                                    | 37  | -2.5524 | 0.0    | 0.0 |
| REACTOME_MITOTIC_G1_PHASE_AND_G1_S_TRANSITION                                                   | 147 | -2.7303 | 0.0    | 0.0 |
| REACTOME_HDR_THROUGH_HOMOLOGOUS_RECOMBINATION_HRR                                               | 66  | -2.7893 | 0.0    | 0.0 |
| REACTOME_MEIOTIC_SYNAPSIS                                                                       | 49  | -2.3809 | 0.0    | 0.0 |
| REACTOME_MEIOSIS                                                                                | 79  | -2.5991 | 0.0    | 0.0 |
| REACTOME_POLO_LIKE_KINASE_MEDIATED_EVENTS                                                       | 16  | -2.49   | 0.0    | 0.0 |
| REACTOME_ACTIVATION_OF_THE_PRE_REPLICATIVE_COMPLEX                                              | 32  | -2.9215 | 0.0    | 0.0 |
| REACTOME_RECOGNITION_AND_ASSOCIATION_OF_DNA_GLYCOSYLASE_WITH_SITE_CONTAINING_AN_AFFECTED_PURINE | 26  | -2.481  | 0.0    | 0.0 |
| REACTOME_APC_CDC20_MEDIATED_DEGRADATION_OF_NEK2A                                                | 26  | -2.1708 | 0.0001 | 0.0 |
| REACTOME_SIRT1_NEGATIVELY_REGULATES_RRNA_EXPRESSION                                             | 30  | -2.4826 | 0.0    | 0.0 |
| REACTOME_OXIDATIVE_STRESS_INDUCED_SENESCENCE                                                    | 87  | -2.1904 | 0.0    | 0.0 |



|                                                                                     |     |         |        |     |
|-------------------------------------------------------------------------------------|-----|---------|--------|-----|
| REACTOME_G2_M_CHECKPOINTS                                                           | 143 | -2.7554 | 0.0    | 0.0 |
| REACTOME_TRANSCRIPTIONAL_REGULATION_OF_GRANULOPŌIESIS                               | 52  | -2.2394 | 0.0    | 0.0 |
| REACTOME_TRANSCRIPTION_COUPLED_NUCLEOTIDE_EXCISION_REPAIR_TC_NER                    | 76  | -2.1176 | 0.0001 | 0.0 |
| REACTOME_CILIUM_ASSEMBLY                                                            | 195 | -1.8208 | 0.0058 | 0.0 |
| KEGG_HOMOLOGOUS_RECOMBINATION                                                       | 27  | -2.5111 | 0.0    | 0.0 |
| REACTOME_CYCLIN_D_ASSOCIATED_EVENTS_IN_G1                                           | 47  | -1.7167 | 0.0129 | 0.0 |
| REACTOME_NUCLEAR_ENVELOPE_NE_REASSEMBLY                                             | 67  | -2.4833 | 0.0    | 0.0 |
| REACTOME_MITOTIC_METAPHASE_AND_ANAPHASE                                             | 225 | -2.9416 | 0.0    | 0.0 |
| REACTOME_MITOTIC_PROMETAPHASE                                                       | 193 | -3.2758 | 0.0    | 0.0 |
| REACTOME_APC_C_CDC20_MEDIATED_DEGRADATION_OF_CYCLIN_B                               | 24  | -2.0514 | 0.0004 | 0.0 |
| WP_REGULATION_OF_SISTER_CHROMATID_SEPARATION_AT_THE_METAPHASEANAPHASE_TRANSITION    | 15  | -2.1792 | 0.0001 | 0.0 |
| WP_CELL_CYCLE                                                                       | 119 | -2.5818 | 0.0    | 0.0 |
| REACTOME_ASSEMBLY_OF_THE_PRE_REPLICATIVE_COMPLEX                                    | 68  | -1.8755 | 0.0032 | 0.0 |
| REACTOME_RESOLUTION_OF_SISTER_CHROMATID_COHESION                                    | 118 | -3.3488 | 0.0    | 0.0 |
| REACTOME_RHO_GTPASES_ACTIVATE_PKNS                                                  | 53  | -1.973  | 0.0011 | 0.0 |
| REACTOME_CELLULAR_SENESCENCE                                                        | 155 | -2.1188 | 0.0001 | 0.0 |
| REACTOME_FANCONI_ANEMIA_PATHWAY                                                     | 37  | -2.1185 | 0.0001 | 0.0 |
| REACTOME_ESTROGEN_DEPENDENT_GENE_EXPRESSION                                         | 111 | -1.7563 | 0.0094 | 0.0 |
| KEGG_CELL_CYCLE                                                                     | 123 | -2.63   | 0.0    | 0.0 |
| REACTOME_CONDENSATION_OF_PROPHASE_CHROMOSOMES                                       | 35  | -2.6805 | 0.0    | 0.0 |
| REACTOME_RUNX1_REGULATES_TRANSCRIPTION_OF_GENES_INVOLVED_IN_DIFFERENTIATION_OF_HSCS | 92  | -1.5984 | 0.0296 | 0.0 |
| REACTOME_DNA_REPLICATION                                                            | 127 | -2.7513 | 0.0    | 0.0 |
| REACTOME_REGULATION_OF_PLK1_ACTIVITY_AT_G2_M_TRANSITION                             | 86  | -2.6285 | 0.0    | 0.0 |
| REACTOME_RNA_POLYMERASE_I_PROMOTER_ESCAPE                                           | 52  | -2.2517 | 0.0    | 0.0 |
| REACTOME_PRE_NOTCH_EXPRESSION_AND_PROCESSING                                        | 82  | -1.6885 | 0.0156 | 0.0 |
| REACTOME_GAP_FILLING_DNA_REPAIR_SYNTHESIS_AND_LIGATION_IN_GG_NER                    | 25  | -2.4277 | 0.0    | 0.0 |
| WP_BASE_EXCISION_REPAIR                                                             | 31  | -2.5328 | 0.0    | 0.0 |
| REACTOME_GLOBAL_GENOME_NUCLEOTIDE_EXCISION_REPAIR_GG_NER                            | 83  | -2.1227 | 0.0001 | 0.0 |
| REACTOME_DNA_REPLICATION_PRE_INITIATION                                             | 84  | -2.4054 | 0.0    | 0.0 |
| KEGG_MISMATCH_REPAIR                                                                | 22  | -2.559  | 0.0    | 0.0 |
| REACTOME_MITOTIC_SPINDLE_CHECKPOINT                                                 | 109 | -3.2107 | 0.0    | 0.0 |
| REACTOME_SIGNALING_BY_RHO_GTPASES                                                   | 402 | -2.3289 | 0.0    | 0.0 |
| REACTOME_DNA_STRAND_ELONGATION                                                      | 32  | -3.0646 | 0.0    | 0.0 |

|                                                                                                        |     |         |        |     |
|--------------------------------------------------------------------------------------------------------|-----|---------|--------|-----|
| REACTOME_APC_C_MEDIATED_DEGRADATION_OF_CELL_CYCLE_PROTEINS                                             | 88  | -1.9093 | 0.0023 | 0.0 |
| REACTOME_MEIOTIC_RECOMBINATION                                                                         | 48  | -2.6358 | 0.0    | 0.0 |
| REACTOME_ORC1_REMOVAL_FROM_CHROMATIN                                                                   | 71  | -1.7797 | 0.008  | 0.0 |
| REACTOME_RESOLUTION_OF_D_LOOP_STRUCTURES_THROUGH_SYNTHESIS_DEPENDENT_STRAND_ANNEALING_SDSA             | 26  | -2.4311 | 0.0    | 0.0 |
| REACTOME_ACTIVATED_PKN1_STIMULATES_TRANSCRIPTION_OF_AR_ANDROGEN_RECEPTOR_REGULATED_GENES_KLK2_AND_KLK3 | 27  | -2.4351 | 0.0    | 0.0 |
| WP_DNA_REPLICATION                                                                                     | 41  | -2.967  | 0.0    | 0.0 |
| PID_BARD1_PATHWAY                                                                                      | 29  | -2.5673 | 0.0    | 0.0 |
| REACTOME_S_PHASE                                                                                       | 162 | -2.7695 | 0.0    | 0.0 |
| REACTOME_DEPOSITION_OF_NEW_CENPA_CONTAINING_NUCLEOSOMES_AT_THE_CENTROMERE                              | 44  | -2.8681 | 0.0    | 0.0 |

***DNA damage response***

|                                                                           |     |         |        |     |
|---------------------------------------------------------------------------|-----|---------|--------|-----|
| WP_MIRNA_REGULATION_OF_DNA_DAMAGE_RESPONSE                                | 88  | -1.8351 | 0.0049 | 0.0 |
| WP_DNA_DAMAGE_RESPONSE                                                    | 66  | -1.8157 | 0.006  | 0.0 |
| WP_ATM_SIGNALING_PATHWAY                                                  | 40  | -2.0345 | 0.0005 | 0.0 |
| WP_INTEGRATED_CANCER_PATHWAY                                              | 44  | -1.8389 | 0.0048 | 0.0 |
| KEGG_NUCLEOTIDE_EXCISION_REPAIR                                           | 42  | -2.4169 | 0.0    | 0.0 |
| REACTOME_DNA_DAMAGE_BYPASS                                                | 48  | -1.8898 | 0.0028 | 0.0 |
| REACTOME_NONHOMOLOGOUS_END_JOINING_NHEJ                                   | 44  | -2.4834 | 0.0    | 0.0 |
| REACTOME_HOMOLOGOUS_DNA_PAIRING_AND_STRAND_EXCHANGE                       | 42  | -2.7215 | 0.0    | 0.0 |
| REACTOME_PCNA_DEPENDENT_LONG_PATCH_BASE_EXCISION_REPAIR                   | 21  | -2.5942 | 0.0    | 0.0 |
| REACTOME_NUCLEOTIDE_EXCISION_REPAIR                                       | 108 | -2.1    | 0.0001 | 0.0 |
| REACTOME_DNA_REPAIR                                                       | 296 | -2.6978 | 0.0    | 0.0 |
| KEGG_BASE_EXCISION_REPAIR                                                 | 33  | -2.169  | 0.0001 | 0.0 |
| REACTOME_BASE_EXCISION_REPAIR                                             | 60  | -2.8635 | 0.0    | 0.0 |
| REACTOME_DNA_DOUBLE_STRAND_BREAK_RESPONSE                                 | 52  | -2.4418 | 0.0    | 0.0 |
| REACTOME_BASE_EXCISION_REPAIR_AP_SITE_FORMATION                           | 33  | -2.4868 | 0.0    | 0.0 |
| REACTOME_MISMATCH_REPAIR                                                  | 15  | -2.2441 | 0.0    | 0.0 |
| REACTOME_HOMOLOGY_DIRECTED_REPAIR                                         | 112 | -3.046  | 0.0    | 0.0 |
| REACTOME_RECOGNITION_OF_DNA_DAMAGE_BY_PCNA_CONTAINING_REPLICATION_COMPLEX | 30  | -2.4868 | 0.0    | 0.0 |
| WP_NUCLEOTIDE_EXCISION_REPAIR                                             | 42  | -2.4755 | 0.0    | 0.0 |
| REACTOME_DNA_DOUBLE_STRAND_BREAK_REPAIR                                   | 140 | -3.0429 | 0.0    | 0.0 |
| REACTOME_PROCESSING_OF_DNA_DOUBLE_STRAND_BREAK_ENDS                       | 73  | -2.8438 | 0.0    | 0.0 |

***ECM metabolism***

|                                       |     |        |        |        |
|---------------------------------------|-----|--------|--------|--------|
| WP_MATRIX_METALLOPROTEINASES          | 29  | 1.6362 | 0.0292 | 0.0038 |
| PID_INTEGRIN5_PATHWAY                 | 17  | 1.6712 | 0.023  | 0.0    |
| KEGG_FOCAL_ADHESION                   | 195 | 1.6641 | 0.0237 | 0.0    |
| REACTOME_LAMININ_INTERACTIONS         | 30  | 1.8015 | 0.0057 | 0.0    |
| REACTOME_MET_ACTIVATES_PTK2_SIGNALING | 30  | 1.6404 | 0.0282 | 0.0026 |
| PID_INTEGRIN1_PATHWAY                 | 66  | 1.9123 | 0.0009 | 0.0    |

|                                                                       |     |        |        |        |
|-----------------------------------------------------------------------|-----|--------|--------|--------|
| REACTOME COLLAGEN CHAIN TRIMERIZATION                                 | 43  | 1.6418 | 0.0278 | 0.0012 |
| REACTOME_INTEGRIN_CELL_SURFACE_INTERACTIONS                           | 84  | 1.7676 | 0.0081 | 0.0    |
| REACTOME_ANCHORING_FIBRIL_FORMATION                                   | 15  | 1.8935 | 0.0015 | 0.0    |
| WP_ALPHA_6_BETA_4_SIGNALING_PATHWAY                                   | 33  | 1.5979 | 0.0409 | 0.0026 |
| REACTOME_COLLAGEN_FORMATION                                           | 89  | 1.8363 | 0.0038 | 0.0    |
| PID_AVB3_OPN_PATHWAY                                                  | 31  | 1.6701 | 0.0232 | 0.0012 |
| REACTOME_DEGRADATION_OF_THE_EXTRACELLULAR_MATRIX                      | 134 | 1.8377 | 0.0039 | 0.0    |
| PID_INTEGRIN2_PATHWAY                                                 | 28  | 1.7013 | 0.0166 | 0.0013 |
| REACTOME_COLLAGEN_BIOSYNTHESIS_AND_MODIFYING_ENZYMES                  | 66  | 1.5997 | 0.0408 | 0.0023 |
| REACTOME_ASSEMBLY_OF_COLLAGEN_FIBRILS_AND_OTHER_MULTIMERIC_STRUCTURES | 61  | 1.8358 | 0.0037 | 0.0    |
| REACTOME_ECM_PROTEOGLYCANS                                            | 76  | 1.7397 | 0.0108 | 0.0    |
| REACTOME_EXTRACELLULAR_MATRIX_ORGANIZATION                            | 291 | 1.7677 | 0.0083 | 0.0    |
| REACTOME_COLLAGEN_DEGRADATION                                         | 63  | 1.7591 | 0.0094 | 0.0    |
| REACTOME_NON_INTEGRIN_MEMBRANE_ECM_INTERACTIONS                       | 59  | 1.773  | 0.0077 | 0.0    |
| KEGG_ECM_RECEPTOR_INTERACTION                                         | 83  | 1.637  | 0.0292 | 0.0    |
| PID_AVB3_INTEGRIN_PATHWAY                                             | 74  | 1.6628 | 0.0234 | 0.0    |
| PID_INTEGRIN3_PATHWAY                                                 | 43  | 1.9161 | 0.0008 | 0.0    |
| PID_SYNDECAN_1_PATHWAY                                                | 46  | 1.5358 | 0.0734 | 0.0048 |
| PID_UPA_UPAR_PATHWAY                                                  | 42  | 1.7766 | 0.0075 | 0.0    |
| WP_FOCAL_ADHESION                                                     | 195 | 1.6186 | 0.0352 | 0.0    |

#### ***Keratinization***

|                                              |     |        |        |     |
|----------------------------------------------|-----|--------|--------|-----|
| REACTOME_FORMATION_OF_THE_CORNIFIED_ENVELOPE | 99  | 1.6139 | 0.0361 | 0.0 |
| REACTOME KERATINIZATION                      | 130 | 1.6896 | 0.019  | 0.0 |

#### ***NCAM signaling***

|                                               |    |        |        |     |
|-----------------------------------------------|----|--------|--------|-----|
| REACTOME_NCAM1_INTERACTIONS                   | 42 | 1.7417 | 0.0108 | 0.0 |
| REACTOME_NCAM_SIGNALING_FOR_NEURITE_OUTGROWTH | 63 | 1.7358 | 0.0108 | 0.0 |

#### ***PPAR signaling***

|                             |    |        |        |        |
|-----------------------------|----|--------|--------|--------|
| KEGG_PPAR_SIGNALING_PATHWAY | 68 | 1.5814 | 0.0491 | 0.0035 |
| WP_PPAR_SIGNALING_PATHWAY   | 67 | 1.618  | 0.0349 | 0.0035 |

#### ***TP53 regulation***

|                                                                                 |     |         |        |        |
|---------------------------------------------------------------------------------|-----|---------|--------|--------|
| REACTOME_TP53_REGULATES_TRANSCRIPTION_OF_CELL_CYCLE_GENES                       | 48  | -1.9636 | 0.0012 | 0.0    |
| REACTOME_TRANSCRIPTIONAL_REGULATION_BY_TP53                                     | 350 | -1.7507 | 0.0099 | 0.0    |
| PID_P53_DOWNSTREAM_PATHWAY                                                      | 131 | 1.4861  | 0.0998 | 0.0021 |
| REACTOME_TP53_REGULATES_TRANSCRIPTION_OF_GENES_INVOLVED_IN_G2_CELL_CYCLE_ARREST | 17  | -1.9329 | 0.0018 | 0.0    |

#### **Others**

##### ***Adipogenesis***

|                                                    |     |        |        |     |
|----------------------------------------------------|-----|--------|--------|-----|
| WP_ADIPOGENESIS                                    | 129 | 1.7206 | 0.0136 | 0.0 |
| WP_TRANSCRIPTION_FACTOR_REGULATION_IN_ADIPOGENESIS | 22  | 1.8038 | 0.0055 | 0.0 |

##### ***Cardiomyopathy***

|                                      |    |        |        |     |
|--------------------------------------|----|--------|--------|-----|
| KEGG_HYPERTROPHIC_CARDIOMYOPATHY_HCM | 83 | 1.6682 | 0.0232 | 0.0 |
|--------------------------------------|----|--------|--------|-----|

|                                                           |     |        |        |        |
|-----------------------------------------------------------|-----|--------|--------|--------|
| KEGG DILATED CARDIOMYOPATHY                               | 89  | 1.6431 | 0.0277 | 0.0011 |
| KEGG ARRHYTHMOGENIC_RIGHT_VENTRICULAR_CARDIOMYOPATHY_ARVC | 74  | 1.5454 | 0.0682 | 0.0011 |
| WP_ARRHYTHMOGENIC_RIGHT_VENTRICULAR_CARDIOMYOPATHY        | 74  | 1.5328 | 0.074  | 0.0034 |
| <b><i>Fatty acid metabolism</i></b>                       |     |        |        |        |
| REACTOME ARACHIDONIC ACID METABOLISM                      | 53  | 1.663  | 0.0236 | 0.0    |
| WP EICOSANOID SYNTHESIS                                   | 22  | 1.6724 | 0.0229 | 0.0027 |
| WP_EICOSANOID_METABOLISM_VIA_LIPO_OXYGENASES_LOX          | 28  | 1.6988 | 0.0171 | 0.0013 |
| REACTOME FATTY ACID METABOLISM                            | 168 | 1.5306 | 0.0756 | 0.0    |
| <b><i>Glutathione/cytochrome p450 metabolism</i></b>      |     |        |        |        |
| WP GLUTATHIONE METABOLISM                                 | 19  | 1.6734 | 0.0228 | 0.0028 |
| REACTOME_PHASE_II_CONJUGATION_OF_COMPOUNDS                | 86  | 1.7161 | 0.0141 | 0.0    |
| KEGG_METABOLISM_OF_XENOBIOTICS_BY_CYTOCHROME_P450         | 48  | 1.9572 | 0.0002 | 0.0    |
| WP_METAPATHWAY_BIOTRANSFORMATION_PHASE_I_AND_II           | 149 | 1.6565 | 0.0249 | 0.0    |
| REACTOME_PHASE_I_FUNCTIONALIZATION_OF_COMPOUNDS           | 93  | 1.6458 | 0.0276 | 0.0    |
| REACTOME_CYTOCHROME_P450_ARRANGED_BY_SUBSTRATE_TYPE       | 55  | 1.5261 | 0.0781 | 0.0048 |
| KEGG RETINOL METABOLISM                                   | 44  | 1.7199 | 0.0136 | 0.0    |
| REACTOME BIOLOGICAL OXIDATIONS                            | 184 | 1.7924 | 0.0065 | 0.0    |
| KEGG GLUTATHIONE METABOLISM                               | 46  | 1.5179 | 0.0812 | 0.0012 |
| REACTOME GLUTATHIONE CONJUGATION                          | 31  | 1.8742 | 0.002  | 0.0    |
| KEGG DRUG METABOLISM CYTOCHROME_P450                      | 50  | 1.925  | 0.0006 | 0.0    |
| <b><i>Muscle contraction</i></b>                          |     |        |        |        |
| REACTOME ION HOMEOSTASIS                                  | 52  | 1.723  | 0.0132 | 0.0    |
| REACTOME SMOOTH MUSCLE CONTRACTION                        | 36  | 2.0309 | 0.0    | 0.0    |
| WP_STRIATED_MUSCLE_CONTRACTION_PATHWAY                    | 38  | 1.7136 | 0.0145 | 0.005  |
| REACTOME MUSCLE CONTRACTION                               | 200 | 1.866  | 0.002  | 0.0    |
| REACTOME CARDIAC CONDUCTION                               | 134 | 1.6643 | 0.0239 | 0.0    |

<sup>1</sup> MO4 cells exposed to 1 $\mu$ M CM-272 for 24 hours were subjected to RNA sequencing, followed by GSEA on normalized gene expression counts. Listed gene sets comply with following cut-offs: nominal  $p$ -value <0.005, FDR-value <0.1, and |NES| >1.

**Table S3 – Multiplex gene expression analysis on *ex vivo* tumor tissue - significantly changed gene sets.** <sup>1</sup>

| Gene set name                                                      | # genes | NES    | FDR-value | p-value |
|--------------------------------------------------------------------|---------|--------|-----------|---------|
| <b>Immune response</b>                                             |         |        |           |         |
| <i>Toll-like receptor signaling</i>                                |         |        |           |         |
| REACTOME_MYD88_INDEPENDENT_TLR4_CASCADE                            | 16      | 2.3143 | 0.0       | 0.0     |
| REACTOME_TOLL_LIKE_RECEPTOR_4_TLR4_CASCADE                         | 20      | 2.223  | 0.0005    | 0.0     |
| REACTOME_TOLL_LIKE_RECEPTOR_CASCADES                               | 22      | 2.1434 | 0.0003    | 0.0     |
| REACTOME_TOLL_LIKE_RECEPTOR_TLR1_TLR2_CASCADE                      | 16      | 2.0911 | 0.0008    | 0.0     |
| WP_CYTOSOLIC_DNASENSING_PATHWAY                                    | 16      | 1.9938 | 0.0025    | 0.0016  |
| WP_NOVEL_INTRACELLULAR_COMPONENTS_OF_RIGILIKE_RECEPTOR_RLR_PATHWAY | 15      | 1.934  | 0.0042    | 0.0     |
| KEGG_RIG_I_LIKE_RECEPTOR_SIGNALING_PATHWAY                         | 16      | 1.8374 | 0.0088    | 0.00    |
| KEGG_TOLL_LIKE_RECEPTOR_SIGNALING_PATHWAY                          | 23      | 1.7758 | 0.0122    | 0.0046  |
| WP_TOLLLIKE_RECEPTOR_SIGNALING_PATHWAY                             | 23      | 1.7679 | 0.0116    | 0.0046  |
| <i>IFN-I response</i>                                              |         |        |           |         |
| REACTOME_DDX58_IFIH1_MEDIATED_INDUCTION_OF_INTERFERON_ALPHA_BETA   | 17      | 2.0716 | 0.0008    | 0.0     |
| <i>T cell receptor signaling</i>                                   |         |        |           |         |
| WP_TCELL_ANTIGEN_RECEPTOR_TCR_SIGNALING_PATHWAY                    | 24      | 1.7989 | 0.0104    | 0.0     |
| <b>Other pathways</b>                                              |         |        |           |         |
| <i>Signaling by nuclear receptors</i>                              |         |        |           |         |
| REACTOME_SIGNALING_BY_NUCLEAR_RECEPTORS                            | 17      | 1.9016 | 0.0051    | 0.0016  |
| <i>Cancer-related pathways</i>                                     |         |        |           |         |
| WP_INTEGRATED_BREAST_CANCER_PATHWAY                                | 15      | 1.961  | 0.0035    | 0.0     |
| REACTOME_TRANSCRIPTIONAL_REGULATION_BY_TP53                        | 16      | 1.8904 | 0.0054    | 0.0047  |
| WP_GASTRIN_SIGNALING_PATHWAY                                       | 16      | 1.8744 | 0.0061    | 0.0015  |
| KEGG_APOPTOSIS                                                     | 15      | 1.8212 | 0.0096    | 0.015   |
| KEGG_PATHWAYS_IN_CANCER                                            | 32      | 1.8003 | 0.0105    | 0.0015  |
| KEGG_APOPTOSIS                                                     | 15      | 1.8212 | 0.0096    | 0.015   |

<sup>1</sup> Tumors of MO4 tumor-bearing mice subjected to the CM-272 treatment regimen were resected at 706.9±193.8 mm<sup>3</sup> tumor volume and subjected to multiplex gene expression analysis, followed by GSEA on normalized gene expression counts. Listed gene sets comply with following cut-offs: nominal *p*-value <0.005, FDR-value <0.1, and |NES| >1.

**Table S4 – Report on statistical significance pertaining to Figure 5C. <sup>1</sup>**

| Days after tumor inoculation          | 7 | 10 | 11 | 12 | 13  | 14  | 17   | 18 | 19 |
|---------------------------------------|---|----|----|----|-----|-----|------|----|----|
| <b>Sidak multiple comparison test</b> |   |    |    |    |     |     |      |    |    |
| vehicle vs CM-272                     | - | -  | -  | -  | -   | -   |      |    |    |
| vehicle vs DC                         | - | -  | *  | *  | **  | *   |      |    |    |
| vehicle vs DC + CM-272                | * | ** | ** | ** | *** | *** |      |    |    |
| CM-272 vs DC                          | - | -  | -  | -  | -   | -   | ***  |    |    |
| CM-272 vs DC + CM-272                 | - | -  | *  | *  | **  | **  | **** |    |    |
| DC vs DC + CM-272                     | - | -  | -  | -  | -   | -   | -    | -  | -  |

<sup>1</sup> MO4 tumor-bearing C57Bl6J mice were subjected to following treatment regimen: vehicle treatment, CM-272 treatment, vehicle treatment + DC vaccination, or CM-272 treatment + DC vaccination, until 1000 mm<sup>3</sup> tumor volume endpoint was reached. Mean tumor volume in time was plotted for each experimental group, until the first mouse of the concerning group had reached the experimental endpoint tumor volume (Figure 5C). Experimental conditions were statistically compared using REML modeling with Geisser-Greenhouse correction and post-hoc Sidak multiple comparison test. Fixed effects of ‘treatment’ was significant ( $p < 0.0001$ ). Adjusted  $p$ -values ( $q$ -values) of the Sidak multiple comparison tests are listed in this table. Asterisks indicate statistical significance: \*  $q \leq 0.05$ ; \*\*  $q \leq 0.01$ ; \*\*\*  $q \leq 0.001$ ; \*\*\*\*  $q \leq 0.0001$ .
